# Supplementary material
Source: publisher figshare collection journal article supplement (https://gsapubs.figshare.com/ndownloader/files/23307335)
Supplement: Supplementary file 1 [file 23307335]

## Sheet: Sheet1
Table DR2: 40Ar/39Ar analytical data
Run ID	Irradiation	Run	Laser	40Ar	40Ar	±s	39Ar	±s	38Ar	±s	37Ar	±s	36Ar	±s	%40Ar*	40Ar*/39ArK	±s	Age	±s
			(W)	(Moles)	(nA)	(nA)	(nA)	(nA)	(nA)	(nA)	(nA)	(nA)	(nA)	(nA)				(Ma)	(Ma)
Sample LG13-1			J = 0.013167 ± 3.0100E-06
37003-01	443PRA	11b	6	6.4857e-15	0.821525	0.0006841	0.287602	0.000344	0.0034869	2.8e-05	0.0001344	2.34e-05	4.59e-05	1.34e-05	98.3493	2.80606	0.0146651	65.7587	0.337374
37003-02	443PRA	11b	6	4.16869e-15	0.52815	0.0007823	0.178403	0.0002066	0.0021437	2.64e-05	6.62e-05	2.12e-05	9.16e-05	1.34e-05	94.8362	2.80432	0.0232086	65.7187	0.53393
37003-04	443PRA	11b	6	4.92696e-15	0.624265	0.0008249	0.210786	0.0002261	0.0025332	3.94e-05	0.0001589	1.7e-05	0.0001135	1.35e-05	94.596	2.79833	0.0198546	65.5809	0.456804
37003-05	443PRA	11b	6	4.77525e-15	0.605058	0.0008509	0.205832	0.0002066	0.0024562	2.48e-05	6.49e-05	1.76e-05	8.67e-05	1.35e-05	95.7336	2.8109	0.0203989	65.8702	0.469253
37003-06	443PRA	11b	6	5.82091e-15	0.737567	0.0008422	0.256788	0.0002554	0.0031216	2.64e-05	7.65e-05	2.12e-05	7.37e-05	1.33e-05	97.0262	2.78363	0.016169	65.2424	0.372079
37003-07	443PRA	11b	6	1.27151e-14	1.61111	0.0011775	0.561953	0.000453	0.0066504	5.35e-05	0.000291	1.92e-05	7.78e-05	1.38e-05	98.5765	2.8229	0.0082412	66.1461	0.189551
37003-08	443PRA	11b	6	7.59454e-15	0.962248	0.0008771	0.333571	0.0003835	0.0039677	4.78e-05	0.0001423	2.27e-05	8.35e-05	1.33e-05	97.4242	2.80712	0.0128427	65.7832	0.295445
37003-09	443PRA	11b	6	5.88666e-15	0.745928	0.0008249	0.239195	0.0002848	0.0030133	3.85e-05	0.000101	1.75e-05	0.0002071	1.37e-05	91.7243	2.85715	0.0179497	66.9342	0.412668
37003-10	443PRA	11b	6	6.17401e-15	0.782363	0.0008078	0.26404	0.0002848	0.0030785	2.8e-05	0.0001382	1.86e-05	0.0001453	1.37e-05	94.4701	2.79596	0.0162272	65.5264	0.373357
37003-11	443PRA	11b	6	6.96137e-15	0.882032	0.0008335	0.308207	0.0003736	0.0036054	2.8e-05	0.0001605	1.74e-05	4.87e-05	1.31e-05	98.3693	2.81188	0.0135741	65.8926	0.312252
37003-12	443PRA	11b	6	5.43152e-15	0.688167	0.0008509	0.240071	0.0002554	0.0028387	2.64e-05	0.0001205	1.8e-05	3.85e-05	1.27e-05	98.3453	2.8158	0.0166784	65.9828	0.383641
37003-13	443PRA	11b	6	5.68999e-15	0.720823	0.0006303	0.24361	0.0002651	0.0029792	4.03e-05	0.0001061	1.72e-05	0.0001224	1.32e-05	94.9439	2.80607	0.016832	65.759	0.387222
37003-14	443PRA	11b	6	5.44714e-15	0.690001	0.0006155	0.240628	0.0003045	0.0030052	4.12e-05	0.0001002	1.78e-05	6e-05	1.31e-05	97.4177	2.7902	0.0170146	65.3937	0.391502
37003-15	443PRA	11b	6	6.01865e-15	0.762395	0.0008335	0.26578	0.000344	0.0031432	2.88e-05	0.0001461	2.19e-05	5.28e-05	1.29e-05	97.9522	2.80651	0.0154168	65.769	0.354665
37003-16	443PRA	11b	6	4.79056e-15	0.606786	0.0006083	0.209292	0.000197	0.0024228	2.72e-05	7.12e-05	2.27e-05	3.36e-05	1.33e-05	98.3557	2.84824	0.0195329	66.7293	0.449116
37003-17	443PRA	11b	6	5.18708e-15	0.657062	0.0008249	0.214236	0.0002554	0.0026189	2.48e-05	0.0001026	1.79e-05	0.0001581	1.33e-05	92.8301	2.84383	0.0194614	66.6278	0.447497
37003-18	443PRA	11b	6	5.29321e-15	0.670591	0.0007823	0.231082	0.0002358	0.0027703	3.49e-05	0.0001296	1.74e-05	3.18e-05	1.31e-05	98.6063	2.85819	0.0176857	66.9581	0.406593
37003-19	443PRA	11b	6	6.37364e-15	0.807478	0.0008422	0.274546	0.0003045	0.0033668	4.22e-05	6.36e-05	2.19e-05	0.0001176	1.29e-05	95.6599	2.81022	0.0148706	65.8545	0.342083
37003-20	443PRA	11b	6	6.92177e-15	0.877006	0.0008335	0.308117	0.0003538	0.0036124	2.97e-05	9.52e-05	2.27e-05	-6.26e-06	1.31e-05	100.224	2.84938	0.0135835	66.7555	0.312319
37003-21	443PRA	12b	6	1.14398e-14	1.44922	0.0010689	0.510369	0.0005042	0.0060627	4.68e-05	0.0001874	1.4e-05	6.4e-05	1.34e-05	98.7035	2.79899	0.0091486	65.5959	0.210484
37003-22	443PRA	12b	6	3.51761e-15	0.445635	0.0007235	0.155982	0.0001914	0.001842	2.14e-05	7.56e-05	1.33e-05	1.38e-05	1.24e-05	99.1029	2.82754	0.0246974	66.2531	0.568012
37003-23	443PRA	12b	6	4.5336e-15	0.574388	0.0006438	0.19821	0.0001914	0.0024385	3.18e-05	7.3e-05	1.36e-05	4.85e-05	1.24e-05	97.5003	2.82166	0.0194799	66.1178	0.448049
37003-24	443PRA	12b	6	6.43995e-15	0.815814	0.0008936	0.28484	0.0003462	0.003386	2.47e-05	7.89e-05	1.34e-05	6.12e-05	1.27e-05	97.7756	2.79665	0.014528	65.5422	0.334259
37003-25	443PRA	12b	6	5.8608e-15	0.742404	0.0008682	0.255498	0.000307	0.0030196	2.91e-05	7.19e-05	1.34e-05	6.46e-05	1.29e-05	97.418	2.8269	0.0161549	66.2382	0.371548
37003-26	443PRA	12b	6	5.0898e-15	0.644727	0.0006172	0.22102	0.0002486	0.0027976	4.21e-05	7.11e-05	1.7e-05	7.23e-05	1.3e-05	96.6718	2.81619	0.0183736	65.9919	0.422633
37003-27	443PRA	12b	6	6.59815e-15	0.835745	0.0009278	0.292038	0.0002874	0.0035328	3.45e-05	7.91e-05	1.33e-05	4.67e-05	1.25e-05	98.3468	2.81067	0.0139013	65.8649	0.319783
37003-28	443PRA	12b	6	4.94382e-15	0.626268	0.0008102	0.218212	0.000239	0.0027018	3.73e-05	6.89e-05	1.31e-05	7.76e-05	1.28e-05	96.3205	2.76069	0.0184863	64.7143	0.425526
37003-29	443PRA	12b	6	5.9135e-15	0.749095	0.0008936	0.26141	0.0002972	0.0030579	2.64e-05	7.82e-05	1.43e-05	1.58e-05	1.3e-05	99.3881	2.84423	0.0159002	66.637	0.36561
37003-30	443PRA	12b	6	6.35298e-15	0.804769	0.0009021	0.279546	0.0003265	0.0033265	2.82e-05	0.0001172	1.33e-05	6.51e-05	1.25e-05	97.6079	2.80621	0.014516	65.7622	0.333943
37003-31	443PRA	12b	6	7.59161e-15	0.961739	0.0009192	0.33123	0.0003658	0.0039438	3e-05	9e-05	1.7e-05	0.0001029	1.25e-05	96.8203	2.80745	0.0124964	65.7907	0.287477
37003-32	443PRA	12b	6	5.7211e-15	0.724746	0.0008021	0.249077	0.000268	0.0029763	2.47e-05	6.69e-05	1.7e-05	7.62e-05	1.3e-05	96.8739	2.81498	0.0165541	65.964	0.380786
37003-33	443PRA	12b	6	4.13982e-15	0.524462	0.000786	0.181974	0.0002008	0.0021412	2.39e-05	1.9e-05	1.86e-05	3.59e-05	1.27e-05	97.9598	2.81947	0.0218249	66.0674	0.502001
37003-34	443PRA	12b	6	7.55658e-15	0.957367	0.0009625	0.335994	0.000356	0.003969	3.09e-05	8.48e-05	1.36e-05	4.29e-05	1.3e-05	98.6779	2.8079	0.0126867	65.801	0.291853
37003-35	443PRA	12b	6	8.02505e-15	1.0167	0.0009278	0.348827	0.0003757	0.0041711	2.91e-05	0.0001135	1.34e-05	0.0001203	1.29e-05	96.4868	2.80844	0.0122871	65.8135	0.282659
37003-36	443PRA	13	6	9.1512e-15	1.15953	0.0011588	0.409121	0.0003562	0.0049849	4.66e-05	8.52e-05	1.22e-05	4.08e-05	1.27e-05	98.9677	2.80083	0.0104846	65.6384	0.241216
37003-37	443PRA	13	6	1.03395e-14	1.31008	0.0011981	0.454887	0.0004054	0.0053885	3.79e-05	7.07e-05	1.41e-05	8.85e-05	1.26e-05	97.9958	2.81815	0.0095957	66.0371	0.220717
37003-38	443PRA	13	6	6.4797e-15	0.820878	0.0009774	0.282681	0.0003169	0.0032898	3.51e-05	7.1e-05	1.4e-05	7.08e-05	1.24e-05	97.444	2.82554	0.0143453	66.207	0.329935
37003-39	443PRA	13	6	8.96646e-15	1.13621	0.0011744	0.380891	0.000366	0.0046597	3.79e-05	6.59e-05	1.49e-05	0.0002501	1.28e-05	93.441	2.78333	0.0114572	65.2355	0.263652
37003-40	443PRA	13	6	6.28128e-15	0.796077	0.0010114	0.277491	0.0003463	0.003306	3.42e-05	4.68e-05	1.37e-05	5.78e-05	1.24e-05	97.8453	2.80291	0.0146852	65.6863	0.33785
37003-41	443PRA	13	6	6.08999e-15	0.771955	0.0010395	0.268256	0.0003267	0.0031268	2.51e-05	7.81e-05	1.24e-05	4.75e-05	1.24e-05	98.1842	2.8213	0.0151487	66.1093	0.348431
37003-42	443PRA	13	6	6.34084e-15	0.803787	0.0009976	0.28167	0.0003758	0.003422	3.61e-05	6.56e-05	1.15e-05	3.6e-05	1.25e-05	98.6842	2.81197	0.0145841	65.8948	0.335484
37003-43	443PRA	13	6	4.40166e-15	0.557959	0.0008373	0.194547	0.0001917	0.0023649	2.16e-05	2.24e-05	1.31e-05	3.61e-05	1.23e-05	98.077	2.80871	0.0198593	65.8197	0.456851
37003-44	443PRA	13	6	6.01233e-15	0.762136	0.0010324	0.26641	0.0002974	0.0032024	2.42e-05	5.08e-05	1.23e-05	4.58e-05	1.26e-05	98.2216	2.80577	0.0152851	65.7521	0.351639
37003-45	443PRA	13	6	8.15635e-15	1.03397	0.0010395	0.362187	0.0004054	0.0045081	4.18e-05	1.6e-05	1.41e-05	5.77e-05	1.24e-05	98.3376	2.8032	0.0115502	65.693	0.265725
37003-46	443PRA	13	6	5.54309e-15	0.702657	0.0010114	0.245127	0.0002682	0.0029357	2.68e-05	7.88e-05	1.17e-05	7.27e-05	1.25e-05	96.9368	2.77463	0.0164161	65.0353	0.377808
37003-47	443PRA	13	6	6.89397e-15	0.874019	0.0010538	0.3057	0.0003758	0.0037612	3.7e-05	7.62e-05	1.49e-05	5.84e-05	1.27e-05	98.0275	2.79856	0.0137062	65.5862	0.315345
37003-48	443PRA	13	6	5.54653e-15	0.703208	0.0008472	0.244371	0.0002682	0.0029497	2.42e-05	6.14e-05	1.23e-05	5.77e-05	1.27e-05	97.5715	2.80363	0.0165016	65.7028	0.379633
37003-49	443PRA	13	6	6.51178e-15	0.825622	0.0010114	0.287739	0.0003463	0.0034345	2.42e-05	7.54e-05	1.24e-05	3.91e-05	1.29e-05	98.6071	2.82522	0.0145833	66.1996	0.33541
37003-50	443PRA	13	6	6.796e-15	0.861785	0.0011204	0.299889	0.000366	0.0037294	3.61e-05	4.57e-05	1.2e-05	4.78e-05	1.27e-05	98.359	2.82237	0.0140021	66.134	0.322054
37003-51	443PRA	13	6	5.50041e-15	0.697484	0.0009449	0.237655	0.0002682	0.0028607	2.51e-05	7.06e-05	1.19e-05	0.0001043	1.28e-05	95.5581	2.80039	0.0172401	65.6283	0.39664
37003-52	443PRA	13	6	5.56482e-15	0.705602	0.0008792	0.247871	0.0002489	0.0030353	3.42e-05	6.51e-05	1.22e-05	4.3e-05	1.24e-05	98.2026	2.79138	0.0159731	65.4208	0.367532
37003-53	443PRA	13	6	7.01381e-15	0.889095	0.001061	0.286463	0.0003365	0.0035361	3.79e-05	4.32e-05	1.41e-05	0.0002964	1.37e-05	90.0583	2.79108	0.0156451	65.4139	0.359988
37003-54	443PRA	13	6	4.56259e-15	0.578392	0.0009386	0.198806	0.0002106	0.0023483	2.16e-05	2.76e-05	1.17e-05	6.69e-05	1.26e-05	96.5549	2.80498	0.0199761	65.7338	0.45956
37003-55	443PRA	13	6	4.86873e-15	0.617168	0.0008682	0.212074	0.0002011	0.0025584	3.32e-05	3.94e-05	1.21e-05	8.22e-05	1.27e-05	96.0369	2.79072	0.0189081	65.4058	0.43507
37003-56	443PRA	13	6	5.30247e-15	0.672212	0.0010045	0.233596	0.0002586	0.0027916	3.51e-05	8.29e-05	1.41e-05	4.77e-05	1.22e-05	97.9114	2.81344	0.0168151	65.9285	0.386799
37003-58	443PRA	13	6	7.98661e-15	1.01241	0.0010904	0.34845	0.0004153	0.0043269	4.37e-05	6.62e-05	1.21e-05	9.93e-05	1.28e-05	97.0883	2.81672	0.0123624	66.0039	0.28436
37003-59	443PRA	13	6	4.95005e-15	0.62732	0.0008523	0.217399	0.0002586	0.0025811	2.16e-05	8.76e-05	1.56e-05	6.7e-05	1.25e-05	96.8426	2.79035	0.0182362	65.3972	0.419611
37003-60	443PRA	14a	6	3.88212e-15	0.492106	0.0009823	0.17269	0.0001935	0.0021225	2.08e-05	2.41e-05	8.2807e-06	3.08e-05	1.56e-05	98.1471	2.79253	0.0277845	65.4474	0.639299
37003-61	443PRA	14a	6	6.36367e-15	0.806693	0.0011322	0.28214	0.0003278	0.0034425	4.29e-05	3.12e-05	1.16e-05	4.62e-05	1.6e-05	98.3035	2.80635	0.0178299	65.7655	0.41018
37003-62	443PRA	14a	6	9.66029e-15	1.2246	0.0011395	0.42632	0.0004358	0.0051131	4.48e-05	6.82e-05	9.28493e-06	7.08e-05	1.6e-05	98.2901	2.81901	0.0120552	66.0568	0.277286
37003-63	443PRA	14a	6	5.65707e-15	0.71711	0.0010474	0.22748	0.0002407	0.0027257	2.27e-05	3.96e-05	8.55628e-06	0.0002518	1.64e-05	89.531	2.8181	0.0223752	66.0357	0.514667
37003-64	443PRA	14a	6	6.07453e-15	0.770051	0.0010749	0.260632	0.0003278	0.0031255	2.27e-05	3.24e-05	8.48646e-06	0.0001077	1.62e-05	95.8342	2.82712	0.0194717	66.2434	0.447829
37003-65	443PRA	14a	6	5.47609e-15	0.694209	0.0010207	0.238301	0.0002503	0.0028949	2.27e-05	6.88e-05	1.1e-05	8.46e-05	1.6e-05	96.389	2.80366	0.0208182	65.7034	0.478942
37003-66	443PRA	14a	6	8.85933e-15	1.12303	0.0011322	0.39058	0.0004063	0.0047506	2.83e-05	7.39e-05	8.84138e-06	6.85e-05	1.6e-05	98.198	2.81912	0.0131094	66.0592	0.301535
37003-67	443PRA	14a	6	6.25409e-15	0.792821	0.001096	0.27305	0.0003376	0.003269	3.6e-05	5.62e-05	8.41724e-06	0.0001052	1.61e-05	96.0581	2.78482	0.0185163	65.2699	0.426087
37003-68	443PRA	14a	6	5.41153e-15	0.685961	0.0008969	0.2385	0.0002503	0.0028324	2.27e-05	5.43e-05	8.2134e-06	5.86e-05	1.58e-05	97.4732	2.79914	0.0204534	65.5996	0.470576
37003-69	443PRA	14a	6	6.11671e-15	0.775417	0.001096	0.273045	0.0003473	0.0032211	2.17e-05	6.23e-05	8.41724e-06	2.85e-05	1.6e-05	98.9249	2.80501	0.0184706	65.7346	0.424925
37003-70	443PRA	14a	6	9.61084e-15	1.21838	0.0012542	0.424873	0.0003768	0.005298	5.27e-05	8.06e-05	9.28493e-06	6.07e-05	1.6e-05	98.5335	2.82122	0.0120996	66.1076	0.2783
37003-71	443PRA	14a	6	8.25918e-15	1.04689	0.0011844	0.357794	0.0003866	0.0042791	4.09e-05	3.21e-05	1.26e-05	0.000133	1.61e-05	96.2152	2.81087	0.014342	65.8694	0.329921
37003-72	443PRA	14a	6	3.52893e-15	0.447297	0.0009701	0.156773	0.0001842	0.0019021	1.81e-05	2.88e-05	8.14678e-06	3.67e-05	1.61e-05	97.5664	2.77942	0.0314988	65.1456	0.724883
37003-73	443PRA	14a	6	4.74917e-15	0.601942	0.0008868	0.209075	0.0002122	0.002486	2.08e-05	3.03e-05	8.41724e-06	3.91e-05	1.55e-05	98.0741	2.81926	0.0228538	66.0625	0.525669
37003-74	443PRA	14a	6	4.90841e-15	0.622208	0.0010141	0.21621	0.0002407	0.002686	3.41e-05	4.26e-05	8.76927e-06	5.54e-05	1.6e-05	97.3613	2.79753	0.0229566	65.5624	0.528179
37003-75	443PRA	14a	6	5.50412e-15	0.697719	0.0010474	0.227099	0.0002599	0.0027624	2.45e-05	3.86e-05	8.6267e-06	0.0001801	1.61e-05	92.3103	2.83172	0.0221052	66.3491	0.508367
37003-76	443PRA	14a	6	5.69981e-15	0.722545	0.0009949	0.245204	0.0002986	0.0030428	3.8e-05	7.51e-05	1.1e-05	0.0001116	1.58e-05	95.4202	2.80744	0.0201496	65.7905	0.463536
37003-77	443PRA	14a	6	4.65612e-15	0.590254	0.0010207	0.205849	0.0002028	0.0024026	2.27e-05	1.83e-05	1.1e-05	2.33e-05	1.57e-05	98.8287	2.82943	0.0235162	66.2965	0.540834
37003-78	443PRA	14a	6	4.98415e-15	0.631799	0.0010474	0.22044	0.0002503	0.0026918	3.12e-05	2.91e-05	8.6977e-06	3.78e-05	1.61e-05	98.2291	2.81096	0.0226328	65.8716	0.520639
37003-79	443PRA	14a	6	5.67045e-15	0.718827	0.0011104	0.250887	0.0002695	0.0030804	3.31e-05	4.01e-05	1.05e-05	1.97e-05	1.58e-05	99.198	2.83776	0.0196753	66.488	0.452452
37003-03	443PRA	11b	6	6.1696e-15	0.781712	0.0008335	0.263709	0.0002848	0.0031644	3.49e-05	0.0001344	1.73e-05	6.99e-05	1.35e-05	97.3488	2.88239	0.0161184	4117.53	0.370447
37003-57	443PRA	13	6	2.66216e-16	0.0337402	0.0007684	0.0003867	8.22e-05	3.39e-05	1.45e-05	1.85e-05	1.16e-05	0.0001091	1.24e-05	3.63916	3.17414	9.85536	3628.1	225.665
Weighted Mean																2.8107	0.00175813	65.7027	0.0426058
J = 0.013013 ± 4.75544E-06
37133-01	456PRC	20	6	4.92135e-15	0.623961	0.0009502	0.217202	0.0002273	0.0025041	2.37e-05	0.0002116	1.03e-05	3.4e-05	1.34e-05	98.3863	2.82402	0.0196006	65.2478	0.443415
37133-02	456PRC	20	6	4.42289e-15	0.560738	0.000805	0.195529	0.0002181	0.0022521	2.02e-05	0.0002098	9.96243e-06	2.94e-05	1.31e-05	98.4498	2.82101	0.0211681	65.1794	0.478892
37133-03	456PRC	20	6	5.30971e-15	0.673071	0.0009437	0.233712	0.0002742	0.0028161	3.38e-05	0.0002412	1.03e-05	3.87e-05	1.32e-05	98.2993	2.8286	0.0181777	65.3516	0.411201
37133-06	456PRC	20	6	5.29895e-15	0.671743	0.0011526	0.189028	0.0002273	0.0022382	3.01e-05	0.0002093	9.67988e-06	0.0004374	1.47e-05	80.5693	2.86094	0.0255342	66.0852	0.57738
37133-07	456PRC	20	6	5.01463e-15	0.635744	0.0010253	0.220728	0.0002366	0.0026674	3.67e-05	0.0002314	9.84733e-06	1.22e-05	1.33e-05	99.4434	2.8618	0.0192477	66.1048	0.435224
37133-08	456PRC	20	6	3.77383e-15	0.478372	0.0008095	0.164568	0.000191	0.0019222	2.02e-05	0.000206	1.02e-05	3.56e-05	1.35e-05	97.7954	2.84041	0.0256624	65.6195	0.580428
37133-09	456PRC	20	6	2.55926e-15	0.324362	0.0008881	0.105013	0.0001648	0.0013941	2.46e-05	0.0001194	1.17e-05	9.5e-05	1.34e-05	91.2675	2.81677	0.039778	65.0832	0.899959
37133-10	456PRC	20	6	6.7684e-15	0.857808	0.0010542	0.296801	0.000351	0.0034799	2.55e-05	0.0003029	9.96243e-06	3.35e-05	1.35e-05	98.8472	2.85449	0.0150892	65.939	0.341225
37133-12	456PRC	20	6	9.6309e-15	1.22052	0.0011682	0.417601	0.0003996	0.0050524	4.44e-05	0.0004184	1.11e-05	0.0001	1.39e-05	97.5667	2.84922	0.01154	65.8195	0.26098
37133-13	456PRC	20	6	6.82427e-15	0.865294	0.0010542	0.300747	0.0003413	0.0035267	2.46e-05	0.0003199	1.06e-05	2.21e-05	1.36e-05	99.2519	2.85325	0.0149185	65.9108	0.33737
37133-14	456PRC	20	6	3.5143e-15	0.445591	0.0008335	0.153467	0.0001999	0.0018215	1.86e-05	8.63e-05	9.36483e-06	1.08e-05	1.34e-05	99.2868	2.8804	0.027186	66.5266	0.61458
37133-15	456PRC	20	6	5.75096e-15	0.729158	0.0010325	0.252188	0.0002932	0.0029537	2.28e-05	0.0002475	1.03e-05	6.52e-05	1.34e-05	97.3453	2.81222	0.0172569	64.98	0.390451
37133-16	456PRC	20	6	4.67711e-15	0.593005	0.0009972	0.196767	0.000191	0.0022993	2.2e-05	0.0002346	1.03e-05	0.0001081	1.38e-05	94.5746	2.84789	0.0222562	65.7893	0.50334
37133-17	456PRC	20	6	4.128e-15	0.52341	0.0008006	0.180518	0.0001999	0.0022311	2.82e-05	0.0001767	1.03e-05	2.57e-05	1.33e-05	98.5506	2.85507	0.0230025	65.9522	0.52017
37133-18	456PRC	20	6	4.52508e-15	0.573742	0.0008709	0.198657	0.0002366	0.0023511	2.2e-05	0.0002494	9.90454e-06	2.53e-05	1.31e-05	98.6994	2.84817	0.0209686	65.7957	0.474218
37133-19	456PRC	20	6	4.628e-15	0.586753	0.0008335	0.19244	0.0002273	0.0023949	3.01e-05	0.0001428	9.41541e-06	0.000115	1.41e-05	94.1567	2.86848	0.0230942	66.2564	0.522157
37133-20	456PRC	20	6	2.48273e-15	0.314782	0.0008653	0.107793	0.000191	0.0012492	1.86e-05	0.0001337	1.13e-05	2.58e-05	1.34e-05	97.5714	2.84694	0.0385373	65.7678	0.871558
37133-21	456PRC	19b	6	5.16744e-15	0.654988	0.0011652	0.225489	0.0002837	0.0025806	2.05e-05	0.000257	9.33381e-06	6.39e-05	1.35e-05	97.1123	2.81809	0.0192482	65.1131	0.435474
37133-22	456PRC	19b	6	4.52902e-15	0.573988	0.0009693	0.194553	0.0001999	0.0023149	2.14e-05	0.0001409	8.59128e-06	4.68e-05	1.33e-05	97.5811	2.8761	0.0214506	66.4291	0.484949
37133-23	456PRC	19b	6	4.75287e-15	0.602467	0.0011402	0.202693	0.0002273	0.0024329	2.78e-05	0.0001539	1.08e-05	7.31e-05	1.33e-05	96.3924	2.86227	0.0209047	66.1155	0.472688
37133-24	456PRC	19b	6	5.53322e-15	0.701163	0.0010986	0.241311	0.0002459	0.0028325	2.14e-05	0.0001588	8.59128e-06	5.95e-05	1.37e-05	97.482	2.82968	0.0179851	65.3761	0.406839
37133-26	456PRC	19b	6	4.66023e-15	0.590515	0.0009849	0.189256	0.000209	0.0024137	3.16e-05	0.0001138	8.2801e-06	0.000144	1.35e-05	92.7288	2.89051	0.0224112	66.7558	0.506574
37133-27	456PRC	19b	6	4.93055e-15	0.624781	0.001122	0.21202	0.0002553	0.0024978	2.14e-05	0.0001427	9.62081e-06	7.76e-05	1.34e-05	96.3075	2.8352	0.0201832	65.5013	0.456531
37133-28	456PRC	19b	6	4.69009e-15	0.594386	0.0010107	0.204525	0.0002181	0.0023392	3.25e-05	0.0001434	8.40238e-06	4.44e-05	1.34e-05	97.7837	2.83896	0.0206563	65.5867	0.467209
37133-29	456PRC	19b	6	6.26846e-15	0.794522	0.0011652	0.264962	0.0003124	0.0031628	2.32e-05	0.0001731	8.40238e-06	0.0001401	1.37e-05	94.7488	2.83837	0.0166719	65.5733	0.377091
37133-30	456PRC	19b	6	3.38077e-15	0.428556	0.0010872	0.147063	0.0001999	0.0016836	1.96e-05	0.0001087	8.72067e-06	2.71e-05	1.32e-05	98.1277	2.85671	0.0282761	65.9894	0.639414
37133-31	456PRC	19b	6	5.41002e-15	0.68586	0.0013232	0.236525	0.0003028	0.0028515	3.35e-05	0.0001626	9.33381e-06	3.52e-05	1.33e-05	98.4828	2.85291	0.0182852	65.9032	0.413507
37133-32	456PRC	19b	6	4.94324e-15	0.626708	0.001122	0.214478	0.0002742	0.0024917	2.32e-05	0.0001451	8.59128e-06	6.17e-05	1.38e-05	97.0761	2.83377	0.0204512	65.4689	0.462601
37133-34	456PRC	19b	6	5.09416e-15	0.645623	0.0011402	0.222855	0.0002273	0.0027258	3.06e-05	0.0001691	8.59128e-06	4.48e-05	1.28e-05	97.9462	2.83474	0.0184098	65.4911	0.416421
37133-35	456PRC	19b	6	1.07455e-15	0.136197	0.0009769	0.0467232	0.0001288	0.0005943	1.96e-05	4.11e-05	7.56637e-06	2.06e-05	1.29e-05	95.4953	2.7809	0.085503	64.2689	1.93534
37133-36	456PRC	19b	6	5.36286e-15	0.679868	0.0010872	0.237609	0.0002553	0.0028129	2.87e-05	0.0001777	8.5276e-06	2.39e-05	1.29e-05	98.9665	2.82889	0.0173273	65.3583	0.391963
37133-37	456PRC	19b	6	5.63139e-15	0.71385	0.001191	0.247292	0.0002553	0.0029112	2.41e-05	0.0001565	9.05539e-06	1.67e-05	1.35e-05	99.3161	2.86407	0.0174723	66.1563	0.395068
37133-39	456PRC	19b	6	3.91654e-15	0.496333	0.0010653	0.170106	0.0001999	0.0020018	1.96e-05	0.0001148	8.5276e-06	4.32e-05	1.34e-05	97.4149	2.83953	0.0248205	65.5997	0.561393
37133-40	456PRC	19b	6	5.60785e-15	0.710742	0.0011402	0.238925	0.0002647	0.0028939	2.97e-05	0.0001778	8.65563e-06	9.62e-05	1.35e-05	95.9754	2.85219	0.0181422	65.887	0.410277
37133-43	456PRC	19b	6	3.33676e-15	0.422894	0.0010653	0.143603	0.000191	0.0017288	1.79e-05	7.91e-05	8.16088e-06	3.99e-05	1.29e-05	97.1948	2.85942	0.0283604	66.0508	0.641299
37133-44	456PRC	19b	6	4.97769e-15	0.630877	0.0011161	0.21845	0.0002273	0.0025249	2.32e-05	0.0001605	8.2201e-06	1.52e-05	1.36e-05	99.2951	2.86475	0.0197234	66.1718	0.445966
37133-45	456PRC	19b	6	5.43548e-15	0.688899	0.0011044	0.226153	0.0002273	0.0026907	2.23e-05	0.0001807	8.10247e-06	0.0001574	1.36e-05	93.1943	2.83606	0.019129	65.5208	0.432679
37133-46	456PRC	18a	6	4.47821e-15	0.566904	0.0009458	0.170586	0.0001725	0.0021492	2.8e-05	3.53e-05	9.0377e-06	0.0002915	1.2e-05	84.6603	2.80939	0.022315	64.9158	0.501727
37133-47	456PRC	18a	6	6.51651e-15	0.825008	0.0008963	0.28476	0.0003114	0.0033796	2.22e-05	5.19e-05	9.0802e-06	3.53e-05	1.08e-05	98.7368	2.85635	0.0124479	65.9812	0.279713
37133-48	456PRC	18a	6	4.8304e-15	0.611491	0.0010222	0.169812	0.0001725	0.0020279	2.04e-05	3.17e-05	9.0802e-06	0.0004223	1.18e-05	79.3879	2.85463	0.0223489	65.9421	0.502207
37133-49	456PRC	18a	6	5.85904e-15	0.741683	0.0012167	0.253221	0.0002716	0.0029591	2.13e-05	6.53e-05	1e-05	7.82e-05	1.12e-05	96.8721	2.83316	0.0146443	65.4551	0.329164
37133-50	456PRC	18a	6	5.10856e-15	0.646659	0.000872	0.222624	0.0002219	0.0025979	1.76e-05	1.48e-05	8.99611e-06	4.44e-05	1.12e-05	97.9537	2.84103	0.0159754	65.6337	0.359048
37133-51	456PRC	18a	6	5.86835e-15	0.742846	0.0008963	0.257716	0.0002815	0.0031331	3.28e-05	4.88e-05	9.16788e-06	2.19e-05	1.14e-05	99.1362	2.85326	0.0142044	65.9112	0.319195
37133-52	456PRC	18a	6	5.49252e-15	0.695242	0.0008402	0.229675	0.0002417	0.0027954	3.67e-05	4.36e-05	9.76371e-06	0.0001695	1.16e-05	92.7352	2.80301	0.016116	64.7708	0.362378
37133-53	456PRC	18a	6	4.82695e-15	0.610937	0.000872	0.207721	0.0001922	0.0024123	2.22e-05	4.04e-05	9.16788e-06	6.27e-05	1.16e-05	96.9518	2.84724	0.0175548	65.7747	0.394514
37133-11	456PRC	20	6	1.94637e-15	0.246674	0.0008823	0.0028713	0.0001063	0.0001659	1.78e-05	4.14e-05	9.21792e-06	0.0008252	1.56e-05	0.128159	0.110041	1.71256	2.58703	40.1074
37133-25	456PRC	19b	6	2.29742e-16	0.0291126	0.0009289	0.0062392	0.0001057	0.0001024	1.29e-05	0.0082164	4.65e-05	6.07e-05	1.29e-05	55.7572	2.61848	0.641634	60.5774	14.5529
37133-38	456PRC	19b	6	4.42893e-15	0.561278	0.0010762	0.189082	0.0002181	0.0022199	2.14e-05	0.000125	8.59128e-06	8.77e-06	1.34e-05	99.5476	2.95208	0.0224232	68.1513	0.506455
37133-42	456PRC	19b	6	1.02453e-15	0.129854	0.0009586	0.0032887	0.0001019	0.0001019	1.63e-05	3.61e-05	7.71751e-06	0.0004129	1.4e-05	5.0706	2.00072	1.31589	46.4678	30.0793
Weighted Mean																2.84422	0.00284726	65.7062	0.0681752
Sample PL14-1			J = 0.013089 ± 4.38539E-06
37107-01	456PRA	16b	6	1.1096e-14	1.40591	0.0013932	0.491867	0.0004885	0.0057768	3.23e-05	0.0002755	1.07e-05	3.52e-05	1.37e-05	99.2682	2.8343	0.0098079	65.8585	0.220534
37107-02	456PRA	16b	6	1.03446e-14	1.31064	0.0014666	0.460648	0.0004591	0.0054178	5.34e-05	0.0002717	1.03e-05	4.95e-05	1.31e-05	98.8883	2.8105	0.0100742	65.3154	0.226588
37107-03	456PRA	16b	6	1.08914e-14	1.37994	0.001543	0.482218	0.0004395	0.0056312	3.14e-05	0.0002551	9.09725e-06	7.75e-05	1.34e-05	98.3385	2.81104	0.0098495	65.3275	0.221533
37107-04	456PRA	16b	6	1.24119e-14	1.57256	0.0017032	0.55019	0.0004885	0.0064639	3.23e-05	0.0003028	9.74525e-06	4.74e-05	1.36e-05	99.1163	2.82986	0.0090141	65.7572	0.202696
37107-05	456PRA	16b	6	7.33765e-15	0.929712	0.001251	0.32635	0.000381	0.0039888	3.98e-05	0.0001869	9.62133e-06	2.57e-05	1.31e-05	99.1922	2.82272	0.0134086	65.5942	0.301539
37107-06	456PRA	16b	6	8.14602e-15	1.03212	0.0014666	0.362075	0.0003713	0.0043262	3.7e-05	0.000218	9.26553e-06	2.95e-05	1.32e-05	99.165	2.82367	0.0124342	65.6158	0.279622
37107-07	456PRA	16b	6	1.12338e-14	1.42335	0.00133	0.499847	0.0004885	0.0061311	4.66e-05	0.0003316	1.01e-05	1.81e-05	1.34e-05	99.6416	2.83427	0.0094429	65.8577	0.212325
37107-08	456PRA	16b	6	1.2691e-14	1.6079	0.0013932	0.566783	0.0004591	0.0066979	4.46e-05	0.0002759	1.03e-05	3.37e-05	1.31e-05	99.3881	2.81644	0.0083282	65.4509	0.187303
37107-09	456PRA	16b	6	8.50774e-15	1.0779	0.0012637	0.378636	0.0003907	0.0045186	4.18e-05	0.0002235	9.5e-06	2.75e-05	1.26e-05	99.2569	2.82254	0.0113886	65.59	0.256113
37107-10	456PRA	16b	6	8.6659e-15	1.09793	0.001303	0.384464	0.0004395	0.0046817	3.89e-05	0.0002147	9.44034e-06	2.31e-05	1.24e-05	99.3892	2.83518	0.0112085	65.8786	0.252024
37107-11	456PRA	16b	6	6.79869e-15	0.861151	0.0012573	0.301719	0.000352	0.0037213	3.61e-05	0.0001289	9.20869e-06	5.28e-05	1.29e-05	98.184	2.79924	0.0142295	65.0582	0.320095
37107-12	456PRA	16b	6	9.82925e-15	1.24498	0.0013507	0.437115	0.0004102	0.0052297	4.56e-05	0.0002269	9.38137e-06	4.35e-05	1.34e-05	98.9713	2.81577	0.0105419	65.4357	0.237092
37107-13	456PRA	16b	6	1.31745e-14	1.66857	0.001543	0.584762	0.0004689	0.0069645	5.53e-05	0.0002933	9.87168e-06	5.94e-05	1.37e-05	98.9526	2.82044	0.0084522	65.5421	0.190083
37107-14	456PRA	16b	6	1.30606e-14	1.65413	0.0014666	0.57988	0.0004787	0.0069406	5.34e-05	0.0003021	1.01e-05	1.98e-05	1.41e-05	99.658	2.83967	0.0086425	65.9808	0.194317
37107-15	456PRA	16b	6	9.3614e-15	1.18555	0.001543	0.415918	0.0004102	0.0049709	4.46e-05	0.0002304	9.80816e-06	1.55e-05	1.37e-05	99.6256	2.83665	0.0113458	65.9121	0.255106
37107-16	456PRA	16b	6	1.19602e-14	1.51414	0.001386	0.530142	0.0004787	0.0065093	4.46e-05	0.0002583	1.01e-05	4.51e-05	1.31e-05	99.1267	2.82804	0.0088729	65.7156	0.199524
37107-17	456PRA	16b	6	6.4073e-15	0.811424	0.001214	0.277968	0.000352	0.0033001	3.79e-05	0.000158	9.56033e-06	8.38e-05	1.29e-05	96.9339	2.82653	0.0153861	65.681	0.345994
37107-18	456PRA	16b	6	1.08184e-14	1.37	0.001622	0.481118	0.0004493	0.0058462	4.66e-05	0.000228	9.5e-06	5.23e-05	1.33e-05	98.8739	2.81237	0.0098902	65.358	0.222444
37107-19	456PRA	16b	6	7.49142e-15	0.948694	0.00122	0.332638	0.0003713	0.0039142	3.05e-05	0.0001638	9.20869e-06	4.62e-05	1.29e-05	98.5596	2.80785	0.0130272	65.2549	0.293018
37107-20	456PRA	16b	6	1.11003e-14	1.40573	0.0012963	0.492961	0.0004689	0.0057755	3.14e-05	0.0002852	9.74525e-06	5.52e-05	1.31e-05	98.8446	2.81555	0.0093903	65.4305	0.211193
37107-21	456PRA	16b	6	1.13579e-14	1.43839	0.0013577	0.503144	0.0004787	0.0059599	4.95e-05	0.0002498	9.74525e-06	2.73e-05	1.34e-05	99.4491	2.83992	0.0093987	65.9867	0.211318
37107-22	456PRA	16b	6	1.02435e-14	1.2973	0.00133	0.454197	0.00042	0.005524	4.75e-05	0.000264	9.62133e-06	3.1e-05	1.31e-05	99.3048	2.83327	0.0099959	65.835	0.224764
37107-23	456PRA	16b	6	1.25749e-14	1.59298	0.0013932	0.560148	0.0004787	0.0066318	5.34e-05	0.0002299	9.62133e-06	2.9e-05	1.31e-05	99.4693	2.82563	0.0084451	65.6606	0.189912
37107-24	456PRA	16b	6	1.11987e-14	1.41865	0.0013932	0.497465	0.0004102	0.0060134	5.14e-05	0.0002669	1.19e-05	4.5e-05	1.33e-05	99.0705	2.82213	0.0093425	65.5806	0.210101
37107-25	456PRA	16b	6	9.08094e-15	1.15057	0.0013718	0.402174	0.00042	0.0048211	2.95e-05	0.0002098	9.74525e-06	4.08e-05	1.35e-05	98.956	2.82789	0.0114659	65.7123	0.257834
37107-26	456PRA	16b	6	9.10823e-15	1.15419	0.0013164	0.401121	0.0004102	0.0048025	4.37e-05	0.0002169	9.20869e-06	5.75e-05	1.28e-05	98.5295	2.83197	0.0110299	65.8053	0.248018
37107-27	456PRA	16b	6	1.30155e-14	1.64927	0.0017863	0.578817	0.00042	0.0070423	5.43e-05	0.0003302	1.01e-05	5.62e-05	1.36e-05	99.0004	2.81779	0.0085838	65.4816	0.193048
37107-28	456PRA	16b	6	8.71883e-15	1.10465	0.0013164	0.387634	0.00042	0.0046634	3.89e-05	0.0001901	9.44034e-06	5.9e-06	1.31e-05	99.8558	2.84248	0.0115331	66.0451	0.259298
37107-29	456PRA	16b	6	1.32076e-14	1.67354	0.0014666	0.584107	0.0005378	0.0070088	4.75e-05	0.0003474	1.42e-05	1.94e-05	1.33e-05	99.6724	2.85259	0.0083691	66.2756	0.188139
37107-30	456PRA	16b	6	1.10718e-14	1.40306	0.0013932	0.489695	0.0004591	0.0057784	3.32e-05	0.0002675	1e-05	4.32e-05	1.34e-05	99.0978	2.83619	0.0096293	65.9015	0.216513
37107-31	456PRA	16b	6	1.01087e-14	1.28112	0.0013507	0.445686	0.00042	0.0052276	3.23e-05	0.0002214	9.87168e-06	6.79e-05	1.33e-05	98.4315	2.82627	0.0103244	65.6751	0.232171
37107-32	456PRA	16b	6	1.1759e-14	1.49027	0.0017863	0.523731	0.0004395	0.0061424	3.23e-05	0.0002811	1.22e-05	6.22e-05	1.29e-05	98.7695	2.80735	0.0090969	65.2435	0.204615
37107-33	456PRA	16b	6	1.44079e-14	1.82597	0.0014666	0.634908	0.0004885	0.0076341	5.24e-05	0.0003342	1.05e-05	7.95e-05	1.35e-05	98.7163	2.8359	0.0078111	65.895	0.175631
37107-34	456PRA	16b	6	1.24566e-14	1.57877	0.0014666	0.552738	0.000597	0.0066733	5.92e-05	0.0002893	9.93579e-06	1.93e-05	1.31e-05	99.6511	2.84315	0.0087969	66.0604	0.19778
37107-35	456PRA	16b	6	1.02466e-14	1.29864	0.001386	0.455918	0.000381	0.0054994	4.27e-05	0.0003346	1.34e-05	1.34e-05	1.32e-05	99.7146	2.83714	0.0099968	65.9232	0.224773
37107-36	456PRA	16b	6	1.19372e-14	1.51289	0.0014666	0.531191	0.0004984	0.0063995	5.04e-05	0.0002298	9.38137e-06	2.9e-05	1.29e-05	99.4419	2.82906	0.008809	65.7389	0.198085
37107-37	456PRA	16b	6	7.77473e-15	0.985228	0.0012766	0.347915	0.0004984	0.0041343	4.08e-05	0.0001611	8.93588e-06	1.85e-05	1.33e-05	99.4522	2.81316	0.0130604	65.3759	0.293745
37107-38	456PRA	16b	6	9.40298e-15	1.19164	0.001303	0.418377	0.0004787	0.0050382	3.89e-05	0.0002253	9.26553e-06	2.97e-05	1.33e-05	99.2723	2.82439	0.010985	65.6322	0.247031
37107-40	456PRA	16b	6	1.21329e-14	1.53751	0.0013932	0.537389	0.0005378	0.0063507	5.43e-05	0.000329	1.34e-05	5.01e-05	1.3e-05	99.0465	2.83066	0.0088198	65.7753	0.198324
37107-41	456PRA	16b	6	8.96849e-15	1.13653	0.0012766	0.393251	0.0004102	0.0047367	4.27e-05	0.000187	1.24e-05	6.72e-05	1.31e-05	98.2497	2.83634	0.0114223	65.905	0.256827
37107-42	456PRA	16b	6	7.96856e-15	1.00967	0.001303	0.351963	0.0003907	0.0041536	2.68e-05	0.0001985	9.62133e-06	1.32e-05	1.29e-05	99.6254	2.85477	0.0124641	66.3254	0.280187
37107-43	456PRA	16b	6	1.26674e-14	1.60495	0.0014666	0.565772	0.0004984	0.0068088	3.23e-05	0.0002869	9.87168e-06	5.48e-05	1.33e-05	98.9964	2.80513	0.0085089	65.1928	0.191394
37107-44	456PRA	16b	6	1.29274e-14	1.63806	0.0014666	0.574636	0.0005279	0.0069443	5.34e-05	0.0002531	9.68298e-06	2.7e-05	1.29e-05	99.5211	2.83378	0.0082752	65.8467	0.186071
37107-45	456PRA	16b	6	1.49875e-14	1.89936	0.001543	0.667436	0.0005279	0.0079278	5.34e-05	0.0003893	1.24e-05	2.97e-05	1.33e-05	99.5521	2.82985	0.0074892	65.7568	0.168406
37107-46	456PRA	18c	6	1.08922e-14	1.38056	0.00146	0.47753	0.0004153	0.0056179	4.85e-05	0.0001161	7.32393e-06	8.84e-05	1.01e-05	98.1035	2.83231	0.0078457	65.813	0.176417
37107-47	456PRA	18c	6	9.92941e-15	1.25849	0.0013023	0.438705	0.0004449	0.0053257	4.18e-05	9.11e-05	7.62168e-06	6.02e-05	1.04e-05	98.5846	2.82413	0.0085539	65.6264	0.192362
37107-48	456PRA	18c	6	1.16673e-14	1.47875	0.0013647	0.518912	0.0004845	0.0063135	5.04e-05	0.0002334	1.11e-05	2.81e-05	9.76217e-06	99.4643	2.83053	0.0071671	65.7724	0.161162
37107-49	456PRA	18c	6	1.28985e-14	1.63474	0.0025849	0.567506	0.0006334	0.0065545	7.6e-05	0.0001228	7.62168e-06	3.93e-05	1.64e-05	99.2952	2.85631	0.0106336	66.3607	0.239033
37107-50	456PRA	18c	6	9.62492e-15	1.21986	0.0012625	0.42716	0.0003857	0.0052072	4.56e-05	9.97e-05	7.74661e-06	2.7e-05	1.03e-05	99.3554	2.83341	0.0085435	65.8381	0.192105
37107-51	456PRA	18c	6	8.54406e-15	1.0828	0.0013023	0.37763	0.000435	0.0046368	3.79e-05	9.43e-05	7.62168e-06	4e-05	9.5462e-06	98.9139	2.8323	0.0092897	65.8128	0.208886
37107-52	456PRA	18c	6	9.46849e-15	1.19995	0.0015367	0.422638	0.0004153	0.0050298	3.14e-05	9.11e-05	7.04911e-06	4.22e-05	1.01e-05	98.9652	2.80592	0.0088258	65.2107	0.19852
37107-53	456PRA	18c	6	8.96274e-15	1.13581	0.0012369	0.398741	0.0004054	0.0048275	4.56e-05	0.000104	7.44043e-06	2.21e-05	9.83514e-06	99.4376	2.82854	0.0088505	65.7271	0.199021
Weighted Mean																2.82775	0.00132617	65.709	0.0369358
Sample HC13-1			J = 0.013245 ± 2.88297E-06
36826-01	430PRA	2	6	1.63475e-14	2.06991	0.0021633	0.734087	0.0006749	0.008809	3.86e-05	0.0007815	1.46e-05	4.73e-05	1.63e-05	99.3342	2.79851	0.0085709	65.8032	0.195132
36826-02	430PRA	2	6	1.65721e-14	2.09824	0.0021633	0.743958	0.0007941	0.0089162	4.34e-05	0.0009139	2.07e-05	3.86e-05	1.58e-05	99.4695	2.80299	0.0084696	65.9066	0.192816
36826-03	430PRA	2	6	7.91978e-15	1.00276	0.0020591	0.352557	0.0004376	0.0042129	3.1e-05	0.0003193	1.2e-05	6.48e-05	1.6e-05	98.0841	2.78734	0.0157721	65.5452	0.359134
36826-04	430PRA	2	6	1.10224e-14	1.39555	0.0021633	0.496279	0.0005856	0.0058766	2.92e-05	0.0005289	1.3e-05	1.92e-05	1.55e-05	99.6064	2.79853	0.0115032	65.8037	0.261893
36826-05	430PRA	2	6	1.14046e-14	1.44397	0.0020447	0.509589	0.0005757	0.0060897	2.92e-05	0.0005627	1.27e-05	3.8e-05	1.59e-05	99.2311	2.80937	0.0113054	66.0539	0.257354
36826-06	430PRA	2	6	1.70778e-14	2.16217	0.0025456	0.768459	0.0007146	0.0093101	6.4e-05	0.0008914	1.46e-05	6.25e-05	1.64e-05	99.1558	2.78747	0.0085216	65.5484	0.194038
36826-07	430PRA	2	6	1.13156e-14	1.43265	0.0021095	0.505424	0.0005263	0.0061303	5.32e-05	0.0005358	1.8e-05	2.73e-05	1.58e-05	99.4478	2.81645	0.0113004	66.2175	0.257218
36826-08	430PRA	2	6	1.22257e-14	1.54755	0.0022204	0.549043	0.0006253	0.0066319	5.41e-05	0.0006048	1.3e-05	2.36e-05	1.61e-05	99.5629	2.80388	0.0108665	65.9271	0.247379
36826-09	430PRA	2	6	2.03074e-14	2.57007	0.0026907	0.91467	0.0007444	0.010939	6.79e-05	0.0007763	1.54e-05	4.05e-05	1.64e-05	99.5431	2.79456	0.0074922	65.7121	0.170583
36826-10	430PRA	2	6	9.54271e-15	1.20775	0.0020591	0.427125	0.0006154	0.0049718	3.1e-05	0.0004377	1.63e-05	3.63e-05	1.55e-05	99.1185	2.80026	0.0131534	65.8436	0.299455
36826-11	430PRA	2	6	1.34941e-14	1.70792	0.0022204	0.60298	0.0007444	0.0073241	6.2e-05	0.0009546	1.38e-05	4.91e-05	1.6e-05	99.1668	2.80644	0.0101664	65.9863	0.231435
36826-12	430PRA	2	6	9.72075e-15	1.23041	0.0021633	0.435358	0.0005757	0.0051579	3.2e-05	0.0004659	1.28e-05	1.08e-05	1.58e-05	99.7548	2.81683	0.0130852	66.2263	0.297841
36826-13	430PRA	2	6	9.38777e-15	1.18823	0.0020215	0.421217	0.0005263	0.0050283	3.29e-05	0.0004734	1.22e-05	1.87e-05	1.59e-05	99.5481	2.80574	0.0133246	65.9702	0.303333
36826-14	430PRA	2	6	1.17694e-14	1.48972	0.0022204	0.512209	0.0006352	0.0061455	3.2e-05	0.0006542	1.38e-05	0.0001599	1.61e-05	96.8151	2.81336	0.0117199	66.1462	0.266777
36826-15	430PRA	2	6	9.28408e-15	1.17505	0.0022204	0.416973	0.0006054	0.0048992	3.29e-05	0.0004618	1.25e-05	1.77e-05	1.54e-05	99.5684	2.80345	0.0135139	65.9174	0.307651
36826-16	430PRA	2	6	7.77828e-15	0.984506	0.002008	0.35	0.0005065	0.0041888	2.82e-05	0.0003515	1.2e-05	3.7e-06	1.54e-05	99.904	2.80771	0.0154673	66.0158	0.352103
36826-17	430PRA	2	6	1.16934e-14	1.47996	0.0021095	0.524101	0.000665	0.006389	5.9e-05	0.0005943	1.98e-05	3.81e-05	1.58e-05	99.2488	2.80015	0.0111924	65.841	0.254812
36826-18	430PRA	2	6	1.15598e-14	1.46299	0.0021095	0.517506	0.0005757	0.006158	3.67e-05	0.0004944	1.27e-05	3.75e-05	1.56e-05	99.2494	2.80333	0.011088	65.9146	0.252424
36826-19	430PRA	2	6	1.0077e-14	1.27533	0.0020591	0.450768	0.0005164	0.0054751	4.83e-05	0.0004749	1.71e-05	3.78e-05	1.58e-05	99.1315	2.80222	0.0124816	65.889	0.284154
36826-20	430PRA	2	6	1.01734e-14	1.28751	0.0021095	0.456581	0.0005856	0.0055489	4.63e-05	0.0004579	1.3e-05	1.45e-05	1.56e-05	99.68	2.80841	0.0123984	66.0318	0.282238
36826-21	430PRA	3a	6	1.24882e-14	1.5812	0.0032757	0.558839	0.0008152	0.0068051	5.26e-05	0.0004457	1.65e-05	2.97e-05	1.68e-05	99.4571	2.81128	0.0119243	66.0982	0.271436
36826-22	430PRA	3a	6	1.49954e-14	1.8984	0.0031765	0.673863	0.000706	0.0080611	6.43e-05	0.0005347	1.41e-05	3.4e-05	1.71e-05	99.4831	2.79985	0.0098519	65.8342	0.224295
36826-23	430PRA	3a	6	1.24227e-14	1.57258	0.0030871	0.55382	0.0009246	0.0067559	5.26e-05	0.0004246	1.27e-05	4.91e-05	1.7e-05	99.0845	2.81074	0.0121881	66.0856	0.277442
36826-24	430PRA	3a	6	9.65391e-15	1.22209	0.0030871	0.434963	0.0004986	0.0051511	2.91e-05	0.0003451	1.24e-05	1.55e-05	1.65e-05	99.6384	2.7967	0.0141612	65.7614	0.322413
36826-25	430PRA	3a	6	1.78966e-14	2.26551	0.0035609	0.801491	0.0009445	0.0095438	6.53e-05	0.0008476	1.57e-05	3.99e-05	1.7e-05	99.4981	2.80964	0.0089207	66.0603	0.203069
36826-27	430PRA	3a	6	1.23258e-14	1.56057	0.0031305	0.540335	0.0006664	0.0064415	5.65e-05	0.0003906	1.25e-05	0.0001485	1.7e-05	97.1738	2.80375	0.0120428	65.9242	0.27416
36826-29	430PRA	3a	6	1.19068e-14	1.50757	0.0031765	0.534174	0.0006268	0.0063978	5.17e-05	0.0004694	1.22e-05	2.64e-05	1.7e-05	99.4973	2.80526	0.0121114	65.9592	0.275716
36826-30	430PRA	3a	6	1.50224e-14	1.90211	0.0030463	0.671141	0.0007854	0.0080039	6.24e-05	0.0004484	1.41e-05	3.55e-05	1.65e-05	99.4578	2.81597	0.0097251	66.2063	0.221361
36826-32	430PRA	5a	6	1.18964e-14	1.50513	0.0012714	0.529206	0.0005628	0.0062722	3.54e-05	0.0001272	9.1351e-06	3.27e-05	1.17e-05	99.3652	2.82225	0.0084224	66.3514	0.191694
36826-33	430PRA	5a	6	1.13191e-14	1.43247	0.0015577	0.506705	0.0006424	0.0062372	5.3e-05	0.0001448	8.14678e-06	7.68e-05	1.2e-05	98.4181	2.77854	0.0092397	65.342	0.210412
36826-34	430PRA	5a	6	9.70638e-15	1.22841	0.0014616	0.432021	0.0007022	0.0051133	3.07e-05	0.0001111	8.34865e-06	3.72e-05	1.2e-05	99.1113	2.81432	0.0107239	66.1683	0.244102
36826-37	430PRA	5a	6	1.3188e-14	1.66908	0.0014616	0.589941	0.0007222	0.0069602	3.64e-05	0.0001492	9.1351e-06	5.14e-05	1.22e-05	99.0954	2.79982	0.0083271	65.8336	0.189579
36826-38	430PRA	5a	6	1.19398e-14	1.5111	0.0010846	0.532364	0.0006325	0.0064183	5.98e-05	0.0001141	9.36056e-06	2.5e-05	1.22e-05	99.5204	2.82103	0.0086663	66.3231	0.197249
36826-39	430PRA	5a	6	9.78666e-15	1.23856	0.0013662	0.439203	0.000523	0.005183	3.07e-05	9.82e-05	8.48646e-06	1.71e-05	1.15e-05	99.6009	2.80493	0.0097622	65.9516	0.222236
36826-40	430PRA	5a	6	1.30158e-14	1.64722	0.0015577	0.582681	0.0006624	0.0069018	3.16e-05	0.0001598	8.6977e-06	4.43e-05	1.21e-05	99.2145	2.80094	0.0082864	65.8594	0.188649
36826-41	430PRA	6a	6	2.24204e-14	2.83717	0.0022074	1.00685	0.0008401	0.0120663	7.37e-05	0.0002021	1.05e-05	2.9e-05	1.41e-05	99.7105	2.80565	0.0063455	65.968	0.144455
36826-42	430PRA	6a	6	1.138e-14	1.44	0.0016469	0.511476	0.0005749	0.0061451	4.9e-05	0.0001094	9.7949e-06	3.43e-05	1.33e-05	99.3067	2.79181	0.0097023	65.6486	0.220911
36826-45	430PRA	6a	6	1.64222e-14	2.07765	0.0014671	0.735712	0.000771	0.0088581	6.48e-05	0.0001963	1.07e-05	3.64e-05	1.37e-05	99.4988	2.80577	0.0075078	65.9709	0.170914
36826-46	430PRA	6a	6	1.46164e-14	1.8493	0.0012932	0.654708	0.0006433	0.0078414	5.59e-05	0.0002126	1.05e-05	3.11e-05	1.32e-05	99.5236	2.8071	0.0077651	66.0016	0.176769
36826-47	430PRA	6a	6	1.2024e-14	1.52122	0.0016469	0.500591	0.0006923	0.0059714	3.07e-05	0.0001382	9.30054e-06	0.0003998	1.49e-05	92.1719	2.79696	0.0112498	65.7675	0.256129
36826-49	430PRA	6a	6	9.22559e-15	1.16716	0.0012932	0.4128	0.0006335	0.0048913	3.07e-05	8.07e-05	8.95879e-06	3.03e-05	1.29e-05	99.2416	2.80191	0.0113996	65.8817	0.259523
36826-51	430PRA	6a	6	2.25713e-14	2.85588	0.0022074	1.01442	0.0007809	0.0123019	6.08e-05	0.0002198	1.05e-05	5.05e-05	1.41e-05	99.4906	2.79688	0.0062566	65.7655	0.142446
36826-52	430PRA	6a	6	1.06007e-14	1.34119	0.0012932	0.472311	0.000712	0.0057509	4.71e-05	9.02e-05	9.48103e-06	2.7e-05	1.32e-05	99.4156	2.81893	0.0104395	66.2748	0.237614
36826-53	430PRA	6a	6	9.20955e-15	1.16534	0.0012093	0.410648	0.0005846	0.0050078	4.41e-05	7.44e-05	9.36002e-06	1.98e-05	1.29e-05	99.5088	2.81978	0.0112674	66.2943	0.256454
36826-55	430PRA	6a	6	1.78481e-14	2.25843	0.0023984	0.80878	0.000771	0.0097365	6.38e-05	0.0001533	1.03e-05	4.79e-05	1.4e-05	99.3819	2.77109	0.0074428	65.1699	0.169509
36826-56	430PRA	6a	6	1.53781e-14	1.94537	0.001831	0.632038	0.0007218	0.0077949	5.59e-05	0.0001249	9.54254e-06	0.0006109	1.64e-05	90.6377	2.78577	0.0101091	65.509	0.230189
36826-58	430PRA	6a	6	8.95274e-15	1.1327	0.001144	0.399173	0.0006335	0.0047274	2.69e-05	9.68e-05	1.13e-05	2.95e-05	1.35e-05	99.2417	2.812	0.0119815	66.1147	0.272735
36826-59	430PRA	6a	6	9.78761e-15	1.2384	0.0014671	0.438458	0.0005554	0.0052966	5.2e-05	8.92e-05	9.30054e-06	4.38e-05	1.32e-05	98.9604	2.79102	0.0108802	65.6303	0.247733
36826-60	430PRA	6a	6	1.04173e-14	1.31809	0.0013793	0.467452	0.0006629	0.0055223	3.45e-05	9.68e-05	9.24175e-06	4.02e-05	1.36e-05	99.1063	2.79047	0.0106571	65.6177	0.242653
36826-61	430PRA	6a	6	1.25327e-14	1.58578	0.0017385	0.561475	0.0007316	0.0066372	3.45e-05	0.0001137	9.48103e-06	3.05e-05	1.34e-05	99.4416	2.80445	0.0093419	65.9405	0.21267
36826-62	430PRA	6a	6	1.13689e-14	1.43833	0.0012932	0.509372	0.0006531	0.0060767	3.45e-05	9.83e-05	8.95879e-06	4.93e-05	1.35e-05	98.9917	2.79118	0.0097475	65.634	0.221941
36826-63	430PRA	6a	6	1.371e-14	1.73458	0.0012932	0.614269	0.000771	0.0072317	3.35e-05	0.0001137	9.54254e-06	2.07e-05	1.32e-05	99.6589	2.81008	0.0084202	66.0705	0.191674
36826-64	430PRA	6a	6	6.7256e-15	0.850886	0.0009338	0.302492	0.0004301	0.00368	4.12e-05	5.25e-05	9.12634e-06	2.99999e-07	1.27e-05	100.005	2.80894	0.0139752	66.0442	0.31813
36826-65	430PRA	6a	6	1.47276e-14	1.86328	0.001831	0.659156	0.0007612	0.0078221	3.54e-05	0.0001325	9.66747e-06	3.74e-05	1.36e-05	99.4175	2.8062	0.0083311	65.9808	0.189655
36826-66	430PRA	6a	6	1.52634e-14	1.93115	0.0015564	0.683069	0.0008698	0.008134	4.22e-05	0.0001459	9.36002e-06	4.48e-05	1.41e-05	99.3245	2.80397	0.0083106	65.9293	0.189194
36826-67	430PRA	6a	6	6.2519e-15	0.79098	0.0008382	0.280045	0.0004301	0.0033803	2.6e-05	6.46e-05	9.24175e-06	3.49e-05	1.27e-05	98.7018	2.78375	0.014975	65.4623	0.340998
36826-68	430PRA	6a	6	1.11445e-14	1.40975	0.0012932	0.494261	0.0005554	0.0058798	3.35e-05	8.98e-05	9.24175e-06	5.48e-05	1.37e-05	98.8542	2.81545	0.0099656	66.1943	0.226837
36826-69	430PRA	6a	6	1.29623e-14	1.63947	0.001831	0.580876	0.0006139	0.0070104	5.69e-05	0.0001169	9.7949e-06	1.8e-05	1.39e-05	99.6899	2.80955	0.0090921	66.0581	0.206971
36826-70	430PRA	6a	6	1.14688e-14	1.45048	0.0013793	0.512218	0.0006433	0.0062559	4.61e-05	0.0001249	9.73088e-06	4.07e-05	1.38e-05	99.1825	2.80452	0.009892	65.9421	0.225193
36826-71	430PRA	6a	6	1.30627e-14	1.65193	0.0016469	0.584883	0.0007218	0.0070022	3.45e-05	0.0001411	9.42019e-06	8.61e-05	1.38e-05	98.4637	2.77692	0.0091269	65.3047	0.207849
36826-73	430PRA	6a	6	9.46505e-15	1.19705	0.0014671	0.424589	0.0005457	0.0049657	4.71e-05	8.52e-05	9.36002e-06	5.71e-05	1.35e-05	98.5905	2.77551	0.0113346	65.2722	0.258128
36826-74	430PRA	6a	6	1.26246e-14	1.5969	0.0012932	0.563287	0.0006237	0.0066256	3.45e-05	0.000137	9.30054e-06	4.66e-05	1.37e-05	99.1486	2.80672	0.0089745	65.9929	0.2043
36826-75	430PRA	6a	6	1.17467e-14	1.48605	0.0012932	0.525134	0.0006629	0.0062743	3.45e-05	0.0001074	9.92472e-06	5.09e-05	1.37e-05	98.9938	2.79727	0.0096115	65.7747	0.218828
36826-26	430PRA	3a	6	7.9405e-16	0.100516	0.0028479	0.0332969	0.0001846	0.0004642	1.7e-05	0.0086022	5.97e-05	2.5e-05	1.61e-05	98.061	2.96161	0.17135	69.5654	3.89309
36826-31	430PRA	5a	6	1.15338e-15	0.145934	0.0005869	0.0462645	0.0001415	0.0005767	1.49e-05	0.0044219	2.96e-05	8.44e-05	1.16e-05	88.0426	2.7775	0.0767937	65.3181	1.74882
36826-35	430PRA	5a	6	3.19655e-16	0.0404562	0.000528	0.0134859	0.0001695	0.000172	1.29e-05	0.0014468	2.28e-05	2.32e-05	1.08e-05	89.158	2.67545	0.245833	62.9594	5.60556
36826-36	430PRA	5a	6	1.24766e-14	1.57894	0.0012714	0.554729	0.0006424	0.0067369	5.89e-05	0.0001489	9.36056e-06	1.42e-05	1.2e-05	99.7487	2.83532	0.0083691	66.653	0.190451
36826-43	430PRA	6a	6	1.11757e-14	1.41413	0.0016469	0.486543	0.0006433	0.0058304	3.16e-05	0.000115	9.18368e-06	4.65e-05	1.35e-05	99.0372	2.87436	0.0104375	67.5539	0.237403
36826-48	430PRA	6a	6	3.86216e-16	0.0488627	0.0007694	0.0171954	0.0001838	0.0002014	1.37e-05	0.0011375	1.59e-05	3.03e-05	1.26e-05	86.8186	2.46671	0.225896	58.1254	5.16458
36826-50	430PRA	6a	6	5.38401e-16	0.0681176	0.0007889	0.0240945	0.0001501	0.0002686	1.97e-05	0.0016085	1.86e-05	2.15e-05	1.26e-05	95.9838	2.71321	0.160448	63.8326	3.65684
36826-54	430PRA	6a	6	4.4776e-16	0.0566563	0.0007603	0.0124612	0.000191	0.000216	1.89e-05	7.69447e-07	8.59593e-06	6.24e-05	1.31e-05	67.1394	3.04842	0.324386	71.5648	7.36205
36826-57	430PRA	6a	6	8.87864e-15	1.12332	0.0012093	0.38767	0.0007316	0.0045862	3.07e-05	8.54e-05	9.54254e-06	3.24e-05	1.29e-05	99.1554	2.86897	0.0124049	67.4296	0.28217
36826-72	430PRA	6a	6	1.01374e-15	0.128197	0.0007992	0.0444714	0.0001985	0.0005835	1.64e-05	0.0027921	3.78e-05	4.68e-05	1.27e-05	94.233	2.71596	0.0882542	63.8961	2.01137
Weighted Mean																2.80197	0.00123944	65.8833	0.0316408
Sample MK12-1			J = 0.013025 ± 2.68450E-06
36773-02	425PRA	N/A	6	2.23367e-14	0.0014446	0.393078	0.0006729	0.0047721	2.73e-05	0.0019228	3.81e-05	6.73e-05	1.41e-05	1.13055	98.2358	2.8247	0.0128165	65.3242	0.288347
36773-03	425PRA	N/A	6	1.78527e-14	0.0012676	0.314121	0.0006631	0.0036827	2.39e-05	0.0015824	3.33e-05	1.4e-05	1.3e-05	0.903619	99.5488	2.86296	0.0148413	66.1931	0.333741
36773-04	425PRA	N/A	6	2.00468e-14	0.0010026	0.353445	0.0005848	0.0042277	4.3e-05	0.0017007	3.52e-05	1.91e-05	1.31e-05	1.01472	99.4506	2.85445	0.0128402	65.9999	0.288772
36773-05	425PRA	N/A	6	3.53526e-14	0.0019071	0.625873	0.0009691	0.0075619	4.68e-05	0.003059	4.73e-05	1.79e-05	1.41e-05	1.78956	99.7149	2.85044	0.0092369	65.9087	0.207745
36773-06	425PRA	N/A	6	2.41364e-14	0.0009343	0.424953	0.0007221	0.0051642	2.82e-05	0.0019427	3.54e-05	4.21e-05	1.41e-05	1.22178	98.9819	2.84511	0.0117389	65.7878	0.264034
36773-08	425PRA	N/A	6	3.52502e-14	0.0016269	0.622216	0.0009889	0.0073949	5.17e-05	0.0026968	4.28e-05	3.62e-05	1.31e-05	1.7842	99.4053	2.84972	0.0088601	65.8924	0.199272
36773-09	425PRA	N/A	6	1.29589e-14	0.0011819	0.226466	0.0004018	0.0026482	2.3e-05	0.0009674	3e-05	3.67e-05	1.37e-05	0.655904	98.3391	2.84745	0.0198668	65.8409	0.446838
36773-10	425PRA	N/A	6	1.86409e-14	0.0013553	0.326486	0.0006631	0.0039632	2.64e-05	0.0015942	3.6e-05	4.77e-05	1.41e-05	0.943614	98.5018	2.8462	0.0151798	65.8125	0.341424
36773-11	425PRA	N/A	6	2.37021e-14	0.0013553	0.42015	0.0007615	0.0050227	4.59e-05	0.001936	3.52e-05	2.6e-05	1.32e-05	1.19995	99.3646	2.83713	0.0116981	65.6066	0.263143
36773-12	425PRA	N/A	6	1.82848e-14	0.0012676	0.322139	0.0007024	0.0037738	2.47e-05	0.0015948	3.63e-05	2.71e-05	1.28e-05	0.925633	99.1382	2.84792	0.0144398	65.8516	0.324774
36773-14	425PRA	N/A	6	2.36654e-14	0.001813	0.412366	0.0008899	0.0051134	4.78e-05	0.0018629	3.65e-05	8.03e-05	2.69e-05	1.19808	98.01	2.84686	0.0212412	65.8276	0.477754
36773-15	425PRA	N/A	6	1.6644e-14	0.0009052	0.29424	0.0006827	0.0034377	2.64e-05	0.001297	3.57e-05	3.06e-05	1.32e-05	0.842634	98.9276	2.83234	0.0156595	65.4977	0.352274
36773-16	425PRA	N/A	6	1.5592e-14	0.0011316	0.275004	0.0004303	0.0032323	2.47e-05	0.0010807	3.21e-05	3.29e-05	1.32e-05	0.789112	98.7662	2.83334	0.0160074	65.5204	0.360096
36773-17	425PRA	N/A	6	1.84363e-14	0.0011819	0.325472	0.0005848	0.0038496	2.73e-05	0.0014671	3.26e-05	2.1e-05	1.33e-05	0.933072	99.3384	2.84715	0.0141816	65.834	0.318968
36773-19	425PRA	N/A	6	3.5637e-14	0.0017196	0.628515	0.0008998	0.007581	5.17e-05	0.0026056	4.12e-05	3.78e-05	1.37e-05	1.80365	99.3845	2.85131	0.008807	65.9286	0.198074
36773-21	425PRA	N/A	6	1.55322e-14	0.0011819	0.274759	0.0005849	0.0032053	2.64e-05	0.0012309	3.31e-05	1.96e-05	1.28e-05	0.786224	99.2656	2.83978	0.0161913	65.6666	0.364204
36773-22	425PRA	N/A	6	1.6374e-14	0.0011068	0.289172	0.0005459	0.0035111	4.02e-05	0.0013553	3.55e-05	1.26e-05	1.27e-05	0.828719	99.5593	2.85248	0.0151394	65.9552	0.34049
36773-23	425PRA	N/A	6	1.42866e-14	0.0008106	0.253652	0.000459	0.0031535	3.55e-05	0.0010186	3.32e-05	6.18e-06	1.25e-05	0.72309	99.7555	2.84302	0.016329	65.7404	0.367286
36773-24	425PRA	N/A	6	1.32536e-14	0.0011819	0.233944	0.0004018	0.0027394	2.22e-05	0.0012154	3.48e-05	1.62e-05	1.3e-05	0.670817	99.292	2.84641	0.018376	65.8172	0.413312
36773-25	425PRA	N/A	6	1.29862e-14	0.0012676	0.229351	0.0004207	0.0027091	2.56e-05	0.0011127	3.33e-05	1.68e-05	1.28e-05	0.657324	99.2509	2.84383	0.0186946	65.7586	0.420493
36773-26	425PRA	N/A	6	1.70084e-14	0.0014446	0.300259	0.0004398	0.0035769	4.21e-05	0.0013553	3.41e-05	6.91e-06	1.48e-05	0.860901	99.7719	2.85993	0.016431	66.1243	0.369502
36773-27	425PRA	N/A	6	1.56278e-14	0.0011819	0.275491	0.0006141	0.0032245	2.39e-05	0.001192	3.53e-05	1.47e-05	1.26e-05	0.790996	99.4551	2.85486	0.0161133	66.0091	0.362381
36773-30	425PRA	N/A	6	2.02604e-14	0.0013553	0.357979	0.0007319	0.0041286	2.56e-05	0.0018764	3.95e-05	2e-05	1.32e-05	1.02535	99.4292	2.84722	0.0135464	65.8356	0.304682
36773-31	425PRA	N/A	6	1.4871e-14	0.0013553	0.263042	0.0004878	0.003069	2.82e-05	0.0013635	3.42e-05	3e-05	1.3e-05	0.752611	98.8208	2.82673	0.0168964	65.3704	0.380126
36773-32	425PRA	N/A	6	2.58295e-14	0.0014446	0.451435	0.0007615	0.0053065	3.18e-05	0.0020486	4.41e-05	7e-05	1.34e-05	1.30716	98.4123	2.84888	0.0111562	65.8734	0.250918
36773-33	425PRA	N/A	6	2.08314e-14	0.0013553	0.365107	0.0006827	0.0044826	3.92e-05	0.0015073	3.62e-05	3.27e-05	1.29e-05	1.05423	99.085	2.86032	0.0129282	66.1331	0.290729
36773-34	425PRA	N/A	6	1.71775e-14	0.0014446	0.302488	0.0006239	0.0036808	3.92e-05	0.0012563	3.61e-05	3.6e-05	1.3e-05	0.869346	98.7748	2.83806	0.0153567	65.6277	0.345439
36773-35	425PRA	N/A	6	1.79414e-14	0.0012676	0.314262	0.0006141	0.0037849	2.73e-05	0.0015556	3.35e-05	6.35e-05	1.41e-05	0.907957	97.9235	2.82847	0.0154841	65.4099	0.348345
36773-37	425PRA	N/A	6	2.15959e-14	0.0014446	0.380441	0.0007516	0.0046869	4.11e-05	0.0017318	3.7e-05	3.51e-05	1.34e-05	1.09288	99.0526	2.84475	0.013023	65.7795	0.292918
36773-38	425PRA	N/A	6	1.74388e-14	0.0012676	0.307999	0.0005751	0.0036272	3e-05	0.00151	3.68e-05	1.6e-05	1.28e-05	0.882517	99.4711	2.84945	0.0145625	65.8864	0.327526
36773-39	425PRA	N/A	6	1.90007e-14	0.0015042	0.334512	0.000849	0.0041132	4.68e-05	0.001508	0.0001153	2.49e-05	1.49e-05	0.961569	99.2377	2.85191	0.0162488	65.9422	0.365442
36773-40	425PRA	N/A	6	4.3044e-14	0.0021708	0.764478	0.0014059	0.0093226	5.65e-05	0.0036437	9.03e-05	4.15e-05	1.63e-05	2.17851	99.4437	2.8331	0.0093625	65.515	0.210617
36773-42	425PRA	N/A	6	5.81998e-14	0.0037407	0.965019	0.0014059	0.0118124	7.51e-05	0.0046784	0.0001277	0.0006987	1.86e-05	2.94548	92.928	2.83573	0.0091105	65.5746	0.204941
36773-43	425PRA	N/A	6	2.73239e-14	0.0017868	0.481921	0.0008589	0.0056422	3.27e-05	0.0024823	8.11e-05	1.08e-05	1.49e-05	1.38271	99.7807	2.86215	0.0117062	66.1747	0.263244
36773-44	425PRA	N/A	6	3.05801e-14	0.0020742	0.540573	0.0012067	0.0067406	5.94e-05	0.003049	0.0001121	5.57e-05	1.49e-05	1.54774	98.9402	2.83209	0.011666	65.492	0.262438
36773-46	425PRA	N/A	6	3.8205e-14	0.0022677	0.67665	0.0012067	0.0081759	7.22e-05	0.002371	9.09e-05	1.08e-05	1.49e-05	1.93328	99.8419	2.85189	0.009602	65.9416	0.215952
36773-47	425PRA	N/A	6	4.29858e-14	0.001978	0.758784	0.0008193	0.0089469	4.02e-05	0.0034319	8.78e-05	2.48e-05	1.56e-05	2.17545	99.6708	2.85687	0.0080232	66.0547	0.180434
36773-48	425PRA	N/A	6	5.72184e-14	0.0033455	1.01623	0.0016054	0.012211	7.32e-05	0.0038839	0.0001242	3.74e-05	1.56e-05	2.89541	99.624	2.83774	0.0079688	65.6203	0.179253
36773-49	425PRA	N/A	6	1.45186e-14	0.0009463	0.25644	0.0005633	0.0029724	2.64e-05	0.0016902	9.78e-05	4.77e-06	1.4e-05	0.734699	99.8228	2.8592	0.0182496	66.1076	0.410404
36773-50	425PRA	N/A	6	2.42162e-14	0.0017868	0.429016	0.0008886	0.0051949	5.26e-05	0.0019069	8.11e-05	2.52e-05	1.47e-05	1.22539	99.3967	2.83834	0.0130244	65.634	0.292975
36773-51	425PRA	N/A	6	1.74652e-14	0.0015042	0.308706	0.0007402	0.0035658	3.27e-05	0.0015432	8.04e-05	1.21e-05	1.45e-05	0.88378	99.602	2.85074	0.0168247	65.9156	0.3784
36773-52	425PRA	N/A	6	1.38491e-14	0.0015042	0.244511	0.000466	0.0028949	2.56e-05	0.0010029	8.83e-05	2.3e-05	1.44e-05	0.700845	99.0297	2.83778	0.0197966	65.6213	0.445313
36773-53	425PRA	N/A	6	2.575e-14	0.0016919	0.457445	0.0010077	0.0055248	5.36e-05	0.002392	8.84e-05	-2e-07	1.43e-05	1.30294	100.018	2.8481	0.0124019	65.8557	0.278937
36773-54	425PRA	N/A	6	1.85324e-14	0.0016919	0.326962	0.0008589	0.003886	3e-05	0.0017365	8.54e-05	2.45e-05	1.49e-05	0.937836	99.2344	2.84566	0.0168272	65.8002	0.378481
36773-55	425PRA	N/A	6	4.60328e-14	0.0024622	0.81448	0.0011071	0.009787	6.24e-05	0.003503	9.17e-05	3.2e-05	1.49e-05	2.32979	99.6003	2.84831	0.0080653	65.8605	0.181399
36773-57	425PRA	N/A	6	4.1224e-14	0.0020742	0.73007	0.0013063	0.0087	3.83e-05	0.003394	0.0001336	9.9e-06	1.63e-05	2.08637	99.8701	2.85333	0.0094987	65.9745	0.213625
36773-58	425PRA	N/A	6	1.71486e-14	0.0014116	0.302377	0.0007008	0.0035773	2.82e-05	0.0016533	8.03e-05	1.93e-05	1.43e-05	0.867948	99.3488	2.85101	0.0167546	65.9218	0.376821
36773-59	425PRA	N/A	6	2.0622e-14	0.0015042	0.360626	0.0008787	0.0042889	3.18e-05	0.0015598	0.0001063	6.24e-05	1.49e-05	1.0437	98.2261	2.84207	0.0152414	65.7187	0.342827
36773-61	425PRA	N/A	6	1.53533e-14	0.0015042	0.270433	0.0006515	0.0031819	2.56e-05	0.0013615	8.07e-05	4.25e-05	1.47e-05	0.776895	98.3777	2.82546	0.0188647	65.3415	0.424415
36773-62	425PRA	N/A	6	1.76601e-14	0.0014116	0.31273	0.0007501	0.0038638	4.97e-05	0.0018097	8.11e-05	3.7e-05	1.46e-05	0.893724	98.7776	2.82217	0.0165987	65.2667	0.373449
36773-63	425PRA	N/A	6	1.50775e-14	0.00132	0.267464	0.0007402	0.0031048	3.27e-05	0.0011878	7.98e-05	7.11e-06	1.43e-05	0.763137	99.7326	2.84489	0.0189381	65.7826	0.425964
36773-65	425PRA	N/A	6	9.48189e-15	0.0019416	0.702041	0.0008954	0.0082433	4.21e-05	0.0035668	0.0001166	3.38e-05	1.7e-05	2.01546	99.5117	2.85613	0.0092122	66.0379	0.207176
36773-66	425PRA	N/A	6	8.35786e-15	0.0014469	0.622882	0.0008256	0.007266	3.64e-05	0.0028972	0.0001072	1.61e-05	1.56e-05	1.77587	99.7398	2.84291	0.0093325	65.7378	0.209916
36773-69	425PRA	N/A	6	3.81149e-15	0.0013901	0.282505	0.0006087	0.0031838	3.18e-05	0.0017473	0.0001059	5.62e-06	1.43e-05	0.809935	99.8074	2.86074	0.0174367	66.1425	0.392117
36773-70	425PRA	N/A	6	4.30715e-15	0.0014276	0.319752	0.0006383	0.0037212	3.45e-05	0.0014527	0.0001023	8.9e-07	1.52e-05	0.915211	99.9818	2.86101	0.0164022	66.1487	0.36885
36773-72	425PRA	N/A	6	3.53819e-15	0.0015556	0.263111	0.000616	0.0031219	3.73e-05	0.0014276	0.0001047	1.51e-05	1.53e-05	0.751958	99.4132	2.84046	0.0199279	65.6821	0.448252
36773-73	425PRA	N/A	6	5.16589e-15	0.0012777	0.384769	0.0007829	0.0045111	3.45e-05	0.0016229	0.0001027	6.12e-06	1.53e-05	1.09788	99.8437	2.84817	0.0141012	65.8573	0.317157
36773-74	425PRA	N/A	6	5.41841e-15	0.0017029	0.403949	0.0007661	0.0046909	3.27e-05	0.002281	0.0001128	4.46e-06	1.51e-05	1.1516	99.8982	2.84724	0.0136115	65.836	0.306146
36773-75	425PRA	N/A	6	1.62463e-15	0.0013202	0.118328	0.0004891	0.0015006	2.14e-05	0.0007019	9.83e-05	2.54e-05	1.56e-05	0.345305	97.8188	2.85385	0.0428542	65.9862	0.963785
36773-76	425PRA	N/A	6	7.02654e-15	0.0018601	0.522768	0.0008515	0.0060791	4.4e-05	0.0025514	0.0001151	3.07e-05	1.55e-05	1.4935	99.3985	2.839	0.0111871	65.6489	0.251644
36773-78	425PRA	N/A	6	3.15066e-15	0.0015556	0.234788	0.0006768	0.002679	2.82e-05	0.0009587	9.72e-05	3.15e-06	1.44e-05	0.669666	99.8687	2.84774	0.0215858	65.8475	0.4855
36773-79	425PRA	N/A	6	5.13462e-15	0.0015556	0.383389	0.0006846	0.0044646	3.18e-05	0.0017988	0.0001048	4.25e-06	1.49e-05	1.09141	99.895	2.84304	0.0137697	65.7408	0.30972
36773-80	425PRA	N/A	6	5.37578e-15	0.0016279	0.397751	0.0007914	0.0045566	3.55e-05	0.0018586	9.98e-05	7.98e-06	1.48e-05	1.14205	99.8021	2.86485	0.0136315	66.236	0.306529
36773-81	425PRA	N/A	6	5.81284e-15	0.0015556	0.432736	0.0007248	0.005082	4.02e-05	0.0020434	0.0001095	6.53e-06	1.47e-05	1.23531	99.8537	2.84976	0.0122997	65.8932	0.276633
36773-82	425PRA	N/A	6	4.73495e-15	0.0016279	0.351209	0.0006689	0.0040869	3.18e-05	0.001758	0.0001047	2.26e-06	1.49e-05	1.00619	99.945	2.86263	0.015004	66.1856	0.3374
36773-83	425PRA	N/A	6	6.65942e-15	0.0016279	0.493849	0.0008603	0.0057791	4.11e-05	0.0023041	0.0001149	2.26e-05	1.55e-05	1.41523	99.5352	2.85168	0.0116674	65.9369	0.262405
36773-84	425PRA	N/A	6	4.41587e-15	0.001434	0.32697	0.0007248	0.0037991	2.91e-05	0.0016828	0.0001068	1.03e-05	1.51e-05	0.93846	99.6837	2.86038	0.016221	66.1343	0.364779
36773-85	425PRA	N/A	6	4.9769e-15	0.0016279	0.368253	0.0006926	0.0042235	3.55e-05	0.001621	0.0001032	1.29e-05	1.56e-05	1.05782	99.6459	2.86165	0.0149258	66.1634	0.335648
36773-86	425PRA	N/A	6	4.30889e-15	0.00146	0.31943	0.0006689	0.0037151	3.45e-05	0.0013378	0.0001064	1.87e-06	1.56e-05	0.915771	99.9488	2.8647	0.0168612	66.2325	0.379154
36773-87	425PRA	N/A	6	4.70983e-15	0.0014866	0.349416	0.0007412	0.0040035	3.64e-05	0.0018435	0.0001056	1.34e-05	1.48e-05	1.00104	99.6124	2.85306	0.0151447	65.9684	0.340606
36773-92	425PRA	N/A	6	2.36989e-14	0.0018385	0.422373	0.0008381	0.0049625	3.64e-05	0.0017635	0.0001616	0	2.12e-05	1.19939	100.01	2.83921	0.0171563	65.6537	0.385913
36773-94	425PRA	N/A	6	2.50648e-14	0.0017029	0.444492	0.0006049	0.0054241	4.65e-05	0.002095	0.0001737	1.13e-05	1.73e-05	1.26846	99.7471	2.8458	0.0135273	65.8034	0.304258
36773-95	425PRA	N/A	6	4.0055e-14	0.0021401	0.706573	0.0008479	0.0085946	6.58e-05	0.0037374	0.0001783	1.2e-06	1.86e-05	2.0265	99.9962	2.86724	0.0099822	66.2902	0.22446
36773-96	425PRA	N/A	6	2.14918e-14	0.0017029	0.379125	0.0007112	0.0045239	3.72e-05	0.0018402	0.0001982	2.2e-06	1.72e-05	1.08741	99.9518	2.86611	0.0158903	66.2645	0.357316
36773-98	425PRA	N/A	6	2.9047e-14	0.0020616	0.516494	0.000721	0.0061207	3.56e-05	0.0020805	0.0001788	9.1e-06	1.98e-05	1.46952	99.8249	2.83949	0.0134515	65.6601	0.302577
36773-99	425PRA	N/A	6	1.68855e-14	0.0015869	0.299594	0.0005571	0.0036669	4.65e-05	0.0015842	0.0001639	6.24e-06	1.7e-05	0.85431	99.796	2.84502	0.019046	65.7857	0.428388
36773-100	425PRA	N/A	6	2.65539e-14	0.0016401	0.471531	0.0006627	0.0055748	5.19e-05	0.0023162	0.0001706	9.6e-06	1.72e-05	1.34335	99.7988	2.84246	0.0128301	65.7277	0.288588
36773-102	425PRA	N/A	6	1.39835e-14	0.001537	0.246299	0.0004442	0.0030763	3.97e-05	0.001283	0.0001668	1.46e-05	1.75e-05	0.707425	99.398	2.85422	0.0231575	65.9945	0.520808
36773-103	425PRA	N/A	6	2.23318e-14	0.0020616	0.395266	0.0007502	0.0046606	4.65e-05	0.0017554	0.0002	9.77e-06	1.73e-05	1.12998	99.7526	2.85099	0.0157119	65.9212	0.353372
36773-104	425PRA	N/A	6	2.72311e-14	0.0018385	0.482188	0.000538	0.0057023	3.8e-05	0.002544	0.0001715	1.52e-05	1.76e-05	1.37782	99.6839	2.84768	0.0127063	65.8461	0.285786
36773-105	425PRA	N/A	6	2.02537e-14	0.0017029	0.360814	0.0004908	0.0043411	3.48e-05	0.0016034	0.0001661	5e-08	1.71e-05	1.0251	100.01	2.84065	0.0160126	65.6864	0.360181
36773-108	425PRA	N/A	6	1.92444e-14	0.0019105	0.340657	0.0006724	0.0041648	5.01e-05	0.0017449	0.000161	9.5e-07	1.7e-05	0.973929	99.9845	2.85781	0.0174418	66.0761	0.392244
36773-109	425PRA	N/A	6	2.66892e-14	0.0017029	0.472588	0.0006049	0.0057445	5.01e-05	0.0026532	0.0001693	1.57e-05	1.74e-05	1.35078	99.6671	2.84803	0.0128251	65.854	0.288456
36773-36	425PRA	N/A	6	1.14071e-15	0.0008631	0.0032148	0.0001839	4.73e-05	1.91e-05	5.05e-05	2.74e-05	7.28e-05	1.34e-05	0.0577252	62.3419	11.1939	1.44236	246.072	29.3836
36773-56	425PRA	N/A	6	3.22542e-15	0.0008981	0.0402771	0.0001563	0.0006018	1.91e-05	0.0002308	7.3e-05	4.66e-05	1.44e-05	0.163203	91.4942	3.70669	0.110446	85.247	2.45778
36773-68	425PRA	N/A	6	6.51781e-15	0.0019416	0.460007	0.0008084	0.00564	4.49e-05	0.0023733	0.0001036	6.74e-05	1.7e-05	1.38512	98.5599	2.967	0.013479	68.5535	0.302714
36773-101	425PRA	N/A	6	1.36677e-15	0.0013342	0.000821	0.0001836	0.0002287	2.66e-05	-0.0002084	0.0001687	3.42e-05	1.66e-05	0.0691437	85.249	71.7849	17.7312	1193.46	214.474
36773-106	425PRA	N/A	6	6.91927e-15	0.0014765	0.0084222	0.0001893	0.0001495	2.56e-05	0.0003155	0.0001579	0.0001582	1.7e-05	0.350284	86.5198	35.9843	1.0496	694.943	16.7057
Weighted Mean																2.84758	0.00144784	65.844	0.0325643
Sample HH13-1			J = 0.013261 ± 3.00697E-06
36828-02	430PRA	1b	6	6.55069e-15	0.830103	0.0010296	0.292783	0.0005022	0.0034798	3.14e-05	0.0004615	1.21e-05	2.73e-05	1.37e-05	99.0357	2.80581	0.0156298	66.0476	0.35625
36828-03	430PRA	1b	6	1.08262e-14	1.37197	0.0013454	0.48199	0.0006297	0.0058387	4.78e-05	0.0019033	2.72e-05	7.05e-05	1.46e-05	98.5088	2.80198	0.010735	65.9591	0.244694
36828-04	430PRA	1b	6	1.35433e-14	1.71635	0.0014213	0.609062	0.0006297	0.0073273	5.63e-05	0.0013798	1.52e-05	5.38e-05	1.39e-05	99.0899	2.79033	0.0084434	65.6898	0.192489
36828-05	430PRA	1b	6	1.07503e-14	1.36243	0.0015811	0.484878	0.0005707	0.0057329	3.85e-05	0.0007567	1.44e-05	2.17e-05	1.34e-05	99.5413	2.79488	0.0100653	65.7951	0.229449
36828-07	430PRA	1b	6	9.02559e-15	1.14397	0.001287	0.398544	0.0005511	0.0047637	3.4e-05	0.0009203	1.61e-05	8.36e-05	1.42e-05	97.8413	2.80635	0.0123317	66.0602	0.281074
36828-08	430PRA	1b	6	1.0336e-14	1.31002	0.0013232	0.466803	0.0005511	0.0055572	3.58e-05	0.0007324	1.35e-05	4.15e-05	1.4e-05	99.0707	2.77823	0.010488	65.4101	0.239136
36828-09	430PRA	1b	6	1.29481e-14	1.64112	0.0015811	0.581513	0.0006002	0.0071468	4.59e-05	0.0008479	1.44e-05	8.84e-05	1.43e-05	98.4085	2.7752	0.0090013	65.3399	0.205246
36828-10	430PRA	1b	6	1.12418e-14	1.42467	0.0013232	0.50315	0.0005707	0.0060664	3.49e-05	0.0014877	1.78e-05	6.46e-05	1.45e-05	98.6785	2.79202	0.010117	65.729	0.230636
36828-11	430PRA	1b	6	7.84863e-15	0.994642	0.0012657	0.353245	0.0005022	0.0042311	3.31e-05	0.000731	1.35e-05	2.12e-05	1.36e-05	99.3878	2.79642	0.013153	65.8306	0.299831
36828-12	430PRA	1b	6	1.2385e-14	1.56958	0.0013159	0.557918	0.0006494	0.0067489	5.35e-05	0.0008098	1.35e-05	2.88e-05	1.4e-05	99.4694	2.79628	0.0091108	65.8274	0.207687
36828-13	430PRA	1b	6	1.06542e-14	1.35026	0.0013454	0.478111	0.0005903	0.005916	5.44e-05	0.0008393	1.44e-05	2.08e-05	1.43e-05	99.5606	2.80965	0.0105607	66.1365	0.240697
36828-15	430PRA	1b	6	1.39917e-14	1.77388	0.0015	0.548396	0.0006691	0.0067449	5.73e-05	0.0008976	1.44e-05	0.0007826	1.7e-05	86.8413	2.80702	0.0114373	66.0758	0.260687
36828-16	430PRA	1b	6	6.92083e-15	0.877678	0.0011526	0.311923	0.000473	0.003729	2.88e-05	0.0006394	1.78e-05	2.19e-05	1.4e-05	99.2772	2.79136	0.0149213	65.7136	0.340163
36828-17	430PRA	1b	6	9.96594e-15	1.26386	0.0012942	0.446866	0.0005511	0.0052434	3.67e-05	0.0006309	1.7e-05	3.39e-05	1.38e-05	99.2146	2.80397	0.0108055	66.0053	0.246296
36828-18	430PRA	1b	6	1.09356e-14	1.3868	0.0014213	0.49444	0.00061	0.005957	4.96e-05	0.0007808	1.52e-05	6.45e-06	1.39e-05	99.8792	2.79931	0.0100877	65.8976	0.229949
36828-19	430PRA	1b	6	1.16175e-14	1.47318	0.0013454	0.525477	0.0006002	0.0063038	5.25e-05	0.0011145	1.52e-05	2.53e-05	1.43e-05	99.5121	2.78775	0.0096988	65.6303	0.221114
36828-20	430PRA	1b	6	9.60345e-15	1.21751	0.0012448	0.433005	0.0006002	0.0052443	5.25e-05	0.000621	1.24e-05	2.13e-05	1.35e-05	99.4953	2.79548	0.011049	65.809	0.251872
36828-21	430PRA	3c	6	1.03792e-14	1.31437	0.0016971	0.469176	0.0006373	0.0054806	3.15e-05	0.0003941	1.2e-05	3.85e-05	1.26e-05	99.1439	2.77468	0.0100191	65.328	0.228454
36828-22	430PRA	3c	6	1.00989e-14	1.27883	0.0018439	0.450778	0.0006373	0.0052905	2.86e-05	0.0003529	1.65e-05	5.45e-05	1.28e-05	98.7448	2.79853	0.0106348	65.8794	0.242422
36828-25	430PRA	3c	6	1.04129e-14	1.31587	0.0017692	0.467502	0.0005485	0.0055497	3.72e-05	0.0003546	1.18e-05	2.05e-05	1.28e-05	99.5526	2.79929	0.0100223	65.897	0.228457
36828-26	430PRA	3c	6	8.47984e-15	1.07375	0.0017692	0.379554	0.000519	0.0047009	4.11e-05	0.000283	1.24e-05	3.27e-05	1.3e-05	99.1094	2.80097	0.0122409	65.9359	0.279024
36828-27	430PRA	3c	6	6.83999e-15	0.866165	0.0016971	0.29562	0.0004993	0.0037463	2.49e-05	0.0002074	1.19e-05	0.0001122	1.31e-05	96.1502	2.8144	0.0155995	66.2462	0.355522
36828-28	430PRA	3c	6	9.08163e-15	1.14998	0.0016971	0.408903	0.0005978	0.0050653	4.4e-05	0.0003142	1.24e-05	3.21e-05	1.27e-05	99.1859	2.78666	0.0113532	65.6049	0.258835
36828-29	430PRA	3c	6	8.7555e-15	1.10877	0.0018439	0.394962	0.0005485	0.0046488	2.96e-05	0.0002787	1.15e-05	3.48e-05	1.25e-05	99.078	2.77861	0.0116421	65.419	0.26545
36828-30	430PRA	3c	6	7.56347e-15	0.957789	0.0016279	0.341193	0.0005091	0.0040988	2.49e-05	0.0009573	2.28e-05	4.34e-05	1.25e-05	98.7128	2.76829	0.013018	65.1803	0.29686
36828-31	430PRA	5a	6	7.09381e-15	0.897642	0.0009481	0.317418	0.0004237	0.0037732	2.69e-05	8.62e-05	7.82432e-06	3.08e-05	1.14e-05	98.9925	2.79564	0.012302	65.8125	0.280436
36828-32	430PRA	5a	6	1.553e-14	1.96516	0.0013662	0.695669	0.0008419	0.0084657	5.49e-05	0.0002287	1.35e-05	3.56e-05	1.22e-05	99.4811	2.80636	0.0074535	66.0604	0.169888
36828-33	430PRA	5a	6	1.00348e-14	1.26977	0.0012714	0.450198	0.0005628	0.0054888	4.71e-05	0.0001308	8.55628e-06	4.92e-05	1.24e-05	98.8629	2.78459	0.0100424	65.5571	0.228958
36828-34	430PRA	5a	6	8.58433e-15	1.08628	0.0010846	0.384678	0.0005131	0.004512	2.88e-05	0.0001033	8.55628e-06	2.84e-05	1.16e-05	99.2369	2.79849	0.0107815	65.8784	0.245766
36828-35	430PRA	5a	6	1.20924e-14	1.53016	0.0012714	0.540523	0.0005628	0.0064544	5.1e-05	0.0001634	8.98721e-06	3.32e-05	1.22e-05	99.3714	2.80926	0.0085072	66.1275	0.193896
36828-36	430PRA	5a	6	8.88358e-15	1.1242	0.0014616	0.397856	0.0005131	0.0047609	2.79e-05	0.000125	8.76927e-06	2.27e-05	1.18e-05	99.4159	2.80532	0.0108986	66.0363	0.248414
36828-37	430PRA	5a	6	8.0204e-15	1.01485	0.0012714	0.359235	0.0005429	0.0043106	2.79e-05	0.0001166	8.6977e-06	1.39e-05	1.22e-05	99.6118	2.8102	0.0121035	66.1492	0.275861
36828-38	430PRA	5a	6	9.34278e-15	1.18215	0.0010022	0.416508	0.0005429	0.0050931	4.51e-05	0.0001365	8.6267e-06	3.24e-05	1.18e-05	99.2026	2.81176	0.0102001	66.1852	0.232473
36828-39	430PRA	5a	6	1.78693e-14	2.26091	0.0016542	0.801684	0.0009516	0.0094543	4.22e-05	0.0002306	9.82344e-06	6.3e-05	1.31e-05	99.1863	2.79343	0.0072043	65.7614	0.164234
36828-40	430PRA	5a	6	8.769e-15	1.10942	0.0010296	0.392946	0.0005429	0.0047332	4.22e-05	0.0001384	1.17e-05	3.01e-05	1.2e-05	99.2117	2.79726	0.0108383	65.85	0.247064
36828-41	430PRA	6a	6	1.13757e-14	1.43918	0.0012932	0.506569	0.0006139	0.005908	3.26e-05	6.7e-05	1.25e-05	4.23e-05	1.33e-05	99.1321	2.81221	0.0096282	66.1956	0.219438
36828-42	430PRA	6a	6	4.66911e-15	0.590745	0.00105	0.206297	0.0002907	0.0024936	2.06e-05	5.06e-05	9.30054e-06	4.15e-05	1.28e-05	97.9257	2.80004	0.0200303	65.9142	0.456583
36828-43	430PRA	6a	6	1.27694e-14	1.61579	0.0014671	0.56404	0.0006923	0.0067094	3.45e-05	7.92e-05	9.18368e-06	0.0001512	1.41e-05	97.217	2.78083	0.0094684	65.4703	0.215881
36828-44	430PRA	6a	6	7.87548e-15	0.996372	0.001073	0.352448	0.000507	0.004136	3.26e-05	7.26e-05	9.24175e-06	1.19e-05	1.31e-05	99.6617	2.81327	0.0127596	66.2202	0.290803
36828-47	430PRA	6a	6	1.17353e-14	1.48407	0.0015564	0.485803	0.0006629	0.0058136	4.51e-05	0.0002365	1.42e-05	0.0004475	1.49e-05	91.0346	2.77695	0.0114669	65.3805	0.26146
36828-48	430PRA	6a	6	7.75145e-15	0.980282	0.0011846	0.344743	0.0005166	0.0040344	3.16e-05	7.42e-05	9.92472e-06	3.14e-05	1.35e-05	99.0628	2.8127	0.0134084	66.2069	0.305592
36828-49	430PRA	6a	6	9.31924e-15	1.17858	0.00112	0.420216	0.0007809	0.0050029	3.93e-05	0.0001114	9.12634e-06	2.62e-05	1.31e-05	99.3597	2.7826	0.0116215	65.5111	0.264966
36828-51	430PRA	6a	6	1.17372e-14	1.48447	0.0016469	0.525665	0.0007415	0.0063535	5e-05	0.0001271	9.99049e-06	4.76e-05	1.35e-05	99.0641	2.79341	0.0099199	65.7611	0.22614
36828-52	430PRA	6a	6	9.36192e-15	1.1841	0.001201	0.417466	0.0005944	0.0049993	4.12e-05	0.0001044	9.92472e-06	6.18e-05	1.33e-05	98.4631	2.78867	0.0113672	65.6515	0.259148
36828-53	430PRA	6a	6	1.05762e-14	1.33774	0.0013793	0.47608	0.0005846	0.0058352	4.61e-05	8.18e-05	1.19e-05	2.28e-05	1.31e-05	99.5074	2.79191	0.0100547	65.7263	0.229216
36828-54	430PRA	6a	6	1.53866e-14	1.94624	0.0016469	0.689614	0.0007218	0.0083192	5.49e-05	0.0001999	1.33e-05	4.32e-05	1.35e-05	99.3638	2.80011	0.0078437	65.9159	0.178794
36828-55	430PRA	6a	6	1.33766e-14	1.6921	0.0013793	0.602186	0.0006923	0.0072505	5.59e-05	0.0001413	1.33e-05	5.66e-05	1.34e-05	99.0222	2.77832	0.0085239	65.4121	0.194352
36828-56	430PRA	6a	6	9.74208e-15	1.23238	0.0014671	0.434536	0.0005652	0.0051554	3.26e-05	0.0001096	9.66747e-06	5.47e-05	1.35e-05	98.6974	2.79499	0.0111548	65.7976	0.254287
36828-58	430PRA	6a	6	1.05647e-14	1.33643	0.0012932	0.473077	0.0006433	0.0056418	3.26e-05	8.72e-05	9.36002e-06	4.57e-05	1.35e-05	98.9962	2.79245	0.0104158	65.7388	0.237448
36828-60	430PRA	6a	6	9.66162e-15	1.22205	0.0013793	0.433586	0.0006237	0.005117	3.07e-05	0.0001014	9.54254e-06	5.21e-05	1.31e-05	98.7477	2.77905	0.0110476	65.429	0.251894
36828-61	430PRA	6a	6	7.11998e-15	0.900481	0.0010348	0.317822	0.0004973	0.0037883	2.6e-05	7.87e-05	9.18368e-06	4.52e-05	1.33e-05	98.5238	2.78731	0.0141734	65.6202	0.323131
36828-62	430PRA	6a	6	1.22321e-14	1.54697	0.0015564	0.552513	0.0006139	0.0066359	5.79e-05	0.0001285	9.85951e-06	3.01e-05	1.3e-05	99.4411	2.78009	0.0089321	65.453	0.203656
36828-63	430PRA	6a	6	1.02309e-14	1.29386	0.0012093	0.454446	0.0005944	0.0054777	4.71e-05	7.73e-05	9.06973e-06	6.85e-05	1.35e-05	98.434	2.79837	0.0106231	65.8757	0.242155
36828-65	430PRA	6a	6	8.03738e-15	1.01646	0.001144	0.35903	0.000507	0.0043869	4.22e-05	9.22e-05	1.09e-05	6.73e-05	1.32e-05	98.0452	2.77166	0.0126697	65.2581	0.288906
36828-66	430PRA	6a	6	1.13505e-14	1.43552	0.0016469	0.508326	0.0006727	0.0062812	4.81e-05	8.79e-05	9.42019e-06	3.28e-05	1.33e-05	99.335	2.80106	0.0099332	65.9378	0.226421
36828-68	430PRA	6a	6	1.16073e-14	1.46821	0.0013793	0.523305	0.0008401	0.006161	3.35e-05	0.0001552	1.2e-05	5.23e-05	1.33e-05	98.9632	2.77242	0.0099282	65.2756	0.226388
36828-69	430PRA	6a	6	1.47914e-14	1.87123	0.001831	0.665015	0.0007218	0.0079749	5.59e-05	0.0002151	1.25e-05	2.93e-05	1.35e-05	99.5623	2.79732	0.0081409	65.8516	0.185575
36828-70	430PRA	6a	6	9.2776e-15	1.1737	0.0011928	0.417747	0.000712	0.0049967	4.61e-05	9.49e-05	9.54254e-06	3.88e-05	1.31e-05	99.0336	2.77829	0.011526	65.4115	0.262804
36828-71	430PRA	6a	6	5.30458e-15	0.671097	0.000856	0.238377	0.000364	0.002847	2.33e-05	6e-05	9.42019e-06	2.54e-05	1.25e-05	98.8928	2.77994	0.0170363	65.4497	0.388435
36828-72	430PRA	6a	6	1.04964e-14	1.3279	0.0013793	0.472681	0.0006335	0.0057691	5.49e-05	8.07e-05	9.24175e-06	6.58e-06	1.29e-05	99.8686	2.8014	0.0101233	65.9457	0.230754
36828-73	430PRA	6a	6	1.16118e-14	1.46903	0.0012932	0.51885	0.0007021	0.0063076	5.1e-05	8.65e-05	9.54254e-06	1.88e-05	1.34e-05	99.6331	2.81671	0.0096638	66.2997	0.220237
36828-74	430PRA	6a	6	8.49907e-15	1.07513	0.0011521	0.383017	0.000536	0.0044731	2.88e-05	7e-05	9.66747e-06	3.35e-05	1.27e-05	99.0855	2.77719	0.0116451	65.386	0.265524
36828-06	430PRA	1b	6	7.22514e-16	0.091566	0.0009621	0.0317475	0.000178	0.0003865	2e-05	0.01929	0.0001103	4.8e-05	1.35e-05	90.905	2.62426	0.13188	61.8463	3.01285
36828-23	430PRA	3c	6	4.59954e-15	0.582271	0.0012714	0.15757	0.0001698	0.001967	1.86e-05	0.0001303	1.1e-05	7.11e-05	1.31e-05	96.3673	3.55773	0.02674	83.3452	0.60375
36828-45	430PRA	6a	6	7.70867e-16	0.0975121	0.0008382	0.0284061	0.0001985	0.0003511	1.49e-05	0.0024756	3.29e-05	5.39e-05	1.23e-05	89.8073	3.08426	0.135289	72.4726	3.07283
36828-50	430PRA	6a	6	7.2468e-16	0.0916538	0.00085	0.0313429	0.000222	0.0003966	1.56e-05	0.0018234	2.8e-05	3.8e-05	1.27e-05	92.5975	2.70719	0.125824	63.7666	2.87148
36828-57	430PRA	6a	6	3.94127e-15	0.498591	0.0014671	0.153483	0.0002555	0.0019101	2.06e-05	0.0001305	9.73088e-06	0.000275	1.31e-05	83.5956	2.71171	0.0283973	63.8713	0.64803
36828-59	430PRA	6a	6	1.068e-15	0.135091	0.000844	0.0240569	0.0001703	0.0003271	1.41e-05	3.32e-05	8.79829e-06	0.0001739	1.33e-05	61.6291	3.45615	0.171688	81.0181	3.88141
36828-64	430PRA	6a	6	7.6711e-16	0.0970131	0.0008382	0.0310575	0.0002062	0.0003835	1.56e-05	0.0019053	2.8e-05	4.38e-05	1.26e-05	91.5291	2.85874	0.125726	67.2708	2.86377
36828-67	430PRA	6a	6	7.93479e-16	0.100365	0.000779	0.0338957	0.0003547	0.0003676	2.33e-05	0.0021186	3.09e-05	4.07e-05	1.28e-05	93.2929	2.76212	0.119337	65.0376	2.72155
Weighted Mean																2.79397	0.001334	65.7742	0.0338656
Sample HH13-2			J = 0.013259 ± 2.97454E-06
36827-01	430PRA	1b	6	1.03725e-14	1.3138	0.0014213	0.456667	0.000512	0.0055513	4.68e-05	0.0004708	1.35e-05	0.000134	1.41e-05	96.966	2.78762	0.0108453	65.6218	0.247254
36827-02	430PRA	1b	6	1.24499e-14	1.57686	0.0014213	0.545207	0.0005903	0.0066354	4.68e-05	0.0005648	1.87e-05	0.0001817	1.49e-05	96.5695	2.79098	0.009777	65.6996	0.22289
36827-04	430PRA	1b	6	9.89202e-15	1.25268	0.0012942	0.443462	0.0005511	0.0052707	3.58e-05	0.0005036	1.26e-05	4.58e-05	1.49e-05	98.9193	2.7922	0.0115123	65.7277	0.262446
36827-05	430PRA	1b	6	1.1365e-14	1.43932	0.0017493	0.509288	0.0006297	0.0061441	4.22e-05	0.0008164	1.35e-05	5.05e-05	1.49e-05	98.9702	2.795	0.0105754	65.7924	0.241077
36827-06	430PRA	1b	6	9.03762e-15	1.14508	0.0012379	0.404	0.0005413	0.0047905	4.78e-05	0.0004153	1.21e-05	4.74e-05	1.45e-05	98.7752	2.7976	0.0122885	65.8525	0.280122
36827-08	430PRA	1b	6	9.37815e-15	1.18827	0.0015	0.421384	0.000512	0.0051545	5.25e-05	0.0004613	1.24e-05	2.61e-05	1.43e-05	99.3555	2.7997	0.0118065	65.9011	0.269126
36827-09	430PRA	1b	6	1.21524e-14	1.53995	0.0015811	0.538976	0.0005903	0.0063395	3.76e-05	0.0006661	1.35e-05	0.0001	1.45e-05	98.0733	2.8001	0.0097577	65.9102	0.222423
36827-10	430PRA	1b	6	1.13775e-14	1.44194	0.0012799	0.512265	0.0005903	0.0060425	4.87e-05	0.0006849	1.27e-05	4.08e-05	1.4e-05	99.1697	2.78942	0.0096977	65.6635	0.221085
36827-11	430PRA	1b	6	1.32332e-14	1.67715	0.0014213	0.59762	0.0006198	0.0072887	5.25e-05	0.000632	1.44e-05	2.38e-05	1.43e-05	99.5875	2.79275	0.0086982	65.7404	0.19829
36827-12	430PRA	1b	6	9.0333e-15	1.14488	0.0012311	0.406798	0.0004924	0.0049925	4.59e-05	0.0005738	1.35e-05	2.62e-05	1.42e-05	99.3337	2.79358	0.0118705	65.7595	0.270605
36827-13	430PRA	1b	6	1.29143e-14	1.63678	0.0014213	0.58166	0.0007284	0.006802	3.85e-05	0.000762	1.52e-05	2.04e-05	1.43e-05	99.6423	2.80186	0.0091416	65.9509	0.208375
36827-14	430PRA	1b	6	7.44662e-15	0.943691	0.0012728	0.334388	0.0005315	0.0040191	3.4e-05	0.0003593	1.13e-05	5.07e-05	1.37e-05	98.4089	2.77521	0.0140455	65.3348	0.320263
36827-15	430PRA	1b	6	9.45028e-15	1.19745	0.0012379	0.42483	0.0006198	0.005133	4.96e-05	0.0005649	1.22e-05	2.47e-05	1.37e-05	99.3982	2.79964	0.0114021	65.8998	0.25991
36827-16	430PRA	1b	6	1.02853e-14	1.3032	0.0013454	0.457753	0.0005609	0.0054866	3.67e-05	0.000451	1.7e-05	9.04e-05	1.45e-05	97.9402	2.78625	0.0110771	65.5902	0.252542
36827-17	430PRA	1b	6	9.74145e-15	1.23426	0.0013454	0.439164	0.0005217	0.0051636	3.58e-05	0.0006321	1.87e-05	3.41e-05	1.37e-05	99.1907	2.78568	0.0109043	65.5771	0.248604
36827-20	430PRA	1b	6	1.05039e-14	1.33079	0.0013454	0.435487	0.0005315	0.0052576	3.4e-05	0.000474	1.52e-05	0.0003882	1.56e-05	91.2997	2.78799	0.012418	65.6304	0.283106
36827-21	430PRA	2	6	1.18998e-14	1.50598	0.0023431	0.539014	0.0005856	0.0064121	3.1e-05	0.0003552	1.18e-05	2.45e-05	1.55e-05	99.5239	2.77822	0.0108114	65.4044	0.246511
36827-22	430PRA	2	6	9.44678e-15	1.1956	0.0022204	0.428167	0.0005658	0.0051555	3.48e-05	0.0003399	1.17e-05	4.16e-05	1.56e-05	98.9746	2.76131	0.0132181	65.0135	0.301451
36827-23	430PRA	2	6	1.69605e-14	2.14636	0.0023431	0.733671	0.0007245	0.0089243	6.3e-05	0.0004288	1.28e-05	0.0003197	1.7e-05	95.5613	2.79323	0.0091754	65.7514	0.209168
36827-24	430PRA	2	6	1.02707e-14	1.29974	0.0022804	0.465129	0.0006253	0.005471	3.1e-05	0.0003435	1.22e-05	2.74e-05	1.54e-05	99.3832	2.77469	0.012322	65.3229	0.280965
36827-25	430PRA	2	6	1.04347e-14	1.32052	0.0021095	0.465827	0.0005658	0.0055518	3.2e-05	0.0003594	1.25e-05	7.05e-05	1.58e-05	98.4176	2.78748	0.0122903	65.6187	0.280198
36827-26	430PRA	2	6	1.42227e-14	1.80004	0.0022204	0.641384	0.000665	0.0076555	4.15e-05	0.0004276	1.3e-05	1.66e-05	1.57e-05	99.7352	2.7966	0.0093727	65.8294	0.213656
36827-27	430PRA	2	6	1.63887e-14	2.07413	0.0022204	0.738563	0.0007245	0.0086461	3.67e-05	0.0006443	1.8e-05	3.35e-05	1.61e-05	99.5319	2.79273	0.00853	65.7399	0.194456
36827-28	430PRA	2	6	9.27825e-15	1.17425	0.0020307	0.414244	0.0006352	0.0049617	2.92e-05	0.0003965	1.63e-05	6.63e-05	1.59e-05	98.3297	2.7849	0.013833	65.5589	0.31538
36827-29	430PRA	2	6	7.89638e-15	0.999424	0.0020353	0.355649	0.0005559	0.0041611	3.2e-05	0.0003251	1.17e-05	5.47e-05	1.55e-05	98.381	2.76221	0.0154718	65.0342	0.352843
36827-30	430PRA	5a	6	1.18129e-14	1.49449	0.0013662	0.531543	0.0005528	0.0061831	3.64e-05	9.05e-05	8.41724e-06	4.97e-05	1.26e-05	99.0178	2.78016	0.0088218	65.4494	0.201142
36827-31	430PRA	5a	6	1.03763e-14	1.31274	0.0013662	0.46941	0.0006424	0.0055299	4.41e-05	8.11e-05	8.34865e-06	2.75e-05	1.2e-05	99.3859	2.77558	0.0097169	65.3435	0.221561
36827-32	430PRA	5a	6	3.31814e-15	0.419873	0.0008859	0.147332	0.0002077	0.0017793	2.06e-05	2.48e-05	7.5213e-06	1.47e-05	1.18e-05	98.9671	2.81654	0.0253052	66.2902	0.576704
36827-33	430PRA	5a	6	8.14828e-15	1.03112	0.0009213	0.364548	0.0006325	0.0043161	4.32e-05	7.07e-05	8.55628e-06	4.6e-05	1.15e-05	98.6803	2.78732	0.0114992	65.6149	0.262162
36827-34	430PRA	5a	6	1.11787e-14	1.41463	0.0010754	0.498792	0.0005827	0.0059791	5.59e-05	8.07e-05	8.2134e-06	6.91e-05	1.21e-05	98.552	2.79122	0.0089967	65.705	0.205099
36827-35	430PRA	5a	6	8.15899e-15	1.03257	0.0010296	0.33943	0.0004932	0.0042075	3.74e-05	7.16e-05	8.08084e-06	0.0002672	1.26e-05	92.2864	2.80362	0.013036	65.9916	0.297139
36827-36	430PRA	5a	6	2.28455e-14	2.89115	0.002338	0.999214	0.0008119	0.0118653	3.83e-05	0.0002655	9.82344e-06	0.0002943	1.39e-05	96.9771	2.80212	0.0065248	65.9571	0.148727
36827-38	430PRA	5a	6	9.53609e-15	1.2067	0.0011775	0.426099	0.0005727	0.0051328	4.81e-05	0.0001071	8.2807e-06	4.57e-05	1.13e-05	98.8864	2.79659	0.0099208	65.8292	0.226152
36827-39	430PRA	5a	6	9.18989e-15	1.16294	0.0010754	0.408789	0.0005628	0.0048902	2.97e-05	7.51e-05	8.2807e-06	6.41e-05	1.2e-05	98.3651	2.79447	0.0106202	65.7802	0.2421
36827-40	430PRA	5a	6	5.34171e-15	0.67593	0.0006607	0.236521	0.0003446	0.0028407	2.51e-05	5.09e-05	7.76209e-06	4.83e-05	1.13e-05	97.8819	2.79343	0.0155291	65.7562	0.35401
36827-41	430PRA	5a	6	7.79613e-15	0.986609	0.0009302	0.349161	0.0005131	0.0042037	2.97e-05	8.08e-05	8.2807e-06	3.42e-05	1.19e-05	98.9812	2.79302	0.0118601	65.7467	0.270371
36827-42	430PRA	5a	6	1.66666e-14	2.10893	0.0014616	0.748581	0.0007122	0.009032	6.68e-05	0.000126	9.20978e-06	4.69e-05	1.28e-05	99.3466	2.79497	0.0070216	65.7918	0.160064
36827-43	430PRA	5a	6	1.56054e-14	1.97446	0.0012714	0.703015	0.0007122	0.0084098	6.48e-05	0.0001663	8.48646e-06	3.15e-05	1.27e-05	99.5399	2.79179	0.0072331	65.7182	0.164893
36827-45	430PRA	6a	6	1.07591e-14	1.36088	0.0016469	0.476291	0.0006237	0.0056273	3.07e-05	7.1e-05	9.99049e-06	0.0001198	1.33e-05	97.3836	2.77832	0.0104808	65.4069	0.238972
36827-46	430PRA	6a	6	6.59167e-15	0.833677	0.0010124	0.286761	0.0005263	0.0033607	2.79e-05	5.2e-05	9.12634e-06	8.85e-05	1.3e-05	96.8452	2.81131	0.0154763	66.1694	0.352727
36827-47	430PRA	6a	6	1.14742e-14	1.45108	0.0012932	0.515673	0.0006727	0.0062337	4.81e-05	6.83e-05	9.48103e-06	4.1e-05	1.37e-05	99.1697	2.78641	0.009799	65.5939	0.223403
36827-48	430PRA	6a	6	8.8843e-15	1.12344	0.0012932	0.396773	0.0005457	0.0047709	3.07e-05	6.54e-05	8.95879e-06	5.41e-05	1.31e-05	98.5767	2.78697	0.0117162	65.6069	0.26711
36827-50	430PRA	6a	6	1.18612e-14	1.50018	0.0012932	0.534057	0.0005749	0.0062927	3.64e-05	5.81e-05	9.12634e-06	8.42e-06	1.33e-05	99.842	2.80038	0.0090768	65.9167	0.206901
36827-51	430PRA	6a	6	7.04064e-15	0.890722	0.001144	0.304918	0.0004876	0.0037155	2.97e-05	4.31e-05	9.12634e-06	0.0001437	1.33e-05	95.1953	2.77668	0.0149132	65.3689	0.340043
36827-53	430PRA	6a	6	1.16514e-14	1.47405	0.0015564	0.525986	0.0006727	0.0063059	4.81e-05	5.87e-05	8.90449e-06	1.79e-05	1.31e-05	99.6482	2.78839	0.0094663	65.6396	0.215812
36827-54	430PRA	6a	6	9.15476e-15	1.15818	0.0013793	0.400853	0.0007415	0.0049078	4.81e-05	4.03e-05	9.12634e-06	0.0001232	1.32e-05	96.8325	2.79357	0.012344	65.7595	0.281401
36827-55	430PRA	6a	6	9.24138e-15	1.16916	0.0012093	0.416513	0.000536	0.0048397	2.97e-05	7.95e-05	9.48103e-06	4.93e-05	1.31e-05	98.758	2.76799	0.0110671	65.168	0.252373
36827-56	430PRA	6a	6	7.8185e-15	0.989082	0.0011121	0.3395	0.0004973	0.0040337	2.88e-05	6.57e-05	1.15e-05	0.0001344	1.27e-05	95.9606	2.7915	0.0130058	65.7114	0.296496
36827-57	430PRA	6a	6	8.04361e-15	1.0177	0.0012093	0.359956	0.0005263	0.0044003	4.51e-05	7.09e-05	9.18368e-06	2.59e-05	1.29e-05	99.2592	2.80215	0.0124942	65.9576	0.284794
36827-58	430PRA	6a	6	9.51876e-15	1.20428	0.0011121	0.421263	0.0006042	0.0049797	2.79e-05	5.37e-05	8.74643e-06	8.39e-05	1.31e-05	97.932	2.79542	0.0111562	65.8022	0.254316
36827-60	430PRA	6a	6	1.57533e-14	1.9931	0.0014671	0.670491	0.0006531	0.0081285	5.69e-05	0.0001546	9.42019e-06	0.0003827	1.8e-05	94.2866	2.7986	0.0097393	65.8755	0.222008
36827-61	430PRA	6a	6	1.76012e-14	2.22677	0.0017385	0.79393	0.00085	0.0095673	6.38e-05	9.2e-05	9.30054e-06	3.72e-05	1.35e-05	99.5128	2.78688	0.0072259	65.6047	0.164739
36827-62	430PRA	6a	6	1.00771e-14	1.27486	0.0011764	0.448678	0.000536	0.0053308	3.26e-05	5.97e-05	9.06973e-06	4.9e-05	1.35e-05	98.8641	2.80487	0.0105801	66.0207	0.241154
36827-64	430PRA	6a	6	1.0916e-14	1.38088	0.0014671	0.484617	0.0008204	0.0057861	3.64e-05	6.86e-05	9.66747e-06	7.09e-05	1.36e-05	98.4792	2.80187	0.0108129	65.9513	0.246471
36827-65	430PRA	6a	6	7.0584e-15	0.892986	0.0009003	0.316955	0.000536	0.0036826	2.69e-05	4.54e-05	9.18368e-06	3.86e-05	1.34e-05	98.7199	2.77714	0.0142656	65.3794	0.325273
36827-66	430PRA	6a	6	9.61183e-15	1.21631	0.0012093	0.412786	0.0005554	0.0049204	3.07e-05	3.76e-05	8.74643e-06	0.0001843	1.35e-05	95.4842	2.80932	0.0116713	66.1235	0.266012
36827-68	430PRA	6a	6	8.79994e-15	1.11371	0.0013793	0.392698	0.000712	0.0046343	2.88e-05	5.09e-05	9.06973e-06	2.47e-05	1.29e-05	99.3497	2.81337	0.0122089	66.2171	0.278251
36827-69	430PRA	6a	6	9.88482e-15	1.25135	0.0015564	0.443621	0.0006042	0.0053093	5.2e-05	5.1e-05	9.42019e-06	5.97e-05	1.31e-05	98.5852	2.77666	0.0109148	65.3683	0.248872
36827-70	430PRA	6a	6	1.18822e-14	1.50424	0.001831	0.527016	0.0005846	0.0064456	4.51e-05	6.87e-05	9.18368e-06	0.0001044	1.35e-05	97.9414	2.7913	0.0097597	65.707	0.222494
36827-71	430PRA	6a	6	1.60904e-14	2.0369	0.0019242	0.724881	0.0006531	0.0083769	3.83e-05	0.0001119	9.48103e-06	5.62e-05	1.34e-05	99.1891	2.78299	0.0075283	65.5148	0.171642
36827-72	430PRA	6a	6	1.04673e-14	1.32509	0.0014671	0.461865	0.0005457	0.0056125	5.1e-05	6.89e-05	9.12634e-06	0.0001132	1.36e-05	97.4636	2.79202	0.0106491	65.7235	0.242766
36827-73	430PRA	6a	6	8.12438e-15	1.02847	0.0010885	0.363535	0.0005263	0.0043839	2.6e-05	3.51e-05	9.73088e-06	2.61e-05	1.31e-05	99.2514	2.80367	0.0124231	65.9928	0.283168
36827-74	430PRA	6a	6	7.49722e-15	0.949038	0.0012932	0.326648	0.0005554	0.0039019	2.51e-05	5.96e-05	8.95879e-06	0.0001354	1.34e-05	95.7564	2.77792	0.0143517	65.3975	0.327234
36827-75	430PRA	6a	6	1.0165e-14	1.28655	0.0013793	0.453696	0.0005554	0.0054879	4.61e-05	6.09e-05	8.85099e-06	6.86e-05	1.35e-05	98.4204	2.78671	0.0106901	65.6008	0.243719
36827-77	430PRA	6a	6	6.09653e-15	0.771485	0.0010424	0.264057	0.0004397	0.0033172	3.74e-05	4.26e-05	8.40773e-06	0.0001249	1.32e-05	95.1807	2.77668	0.0166737	65.3688	0.380183
36827-78	430PRA	6a	6	1.50073e-14	1.89902	0.0016469	0.678382	0.0007316	0.0081488	5.69e-05	0.0001022	9.06973e-06	3.6e-05	1.29e-05	99.4481	2.77967	0.0077486	65.438	0.176672
36827-79	430PRA	6a	6	1.24714e-14	1.57818	0.0013793	0.559707	0.0006237	0.006589	3.93e-05	9.67e-05	9.30054e-06	5.71e-05	1.35e-05	98.9354	2.78541	0.009002	65.5708	0.205236
36827-03	430PRA	1b	6	3.87648e-13	49.0938	0.015027	0.752212	0.001205	0.0095508	0.0001211	0.0007401	1.61e-05	0.0002067	3.2e-05	99.8748	65.1528	0.13197	1121.93	1.68261
Weighted Mean																2.79063	0.00127581	65.6915	0.0325902
Sample HH13-3			J = 0.013247 ± 2.92543E-06
36829-03	430PRA	1a	6	2.5268e-14	3.19828	0.0022581	1.1399	0.0009266	0.0137545	8.32e-05	0.0016996	1.88e-05	2.34e-05	1.4e-05	99.7955	2.7981	0.0057176	65.8032	0.130173
36829-06	430PRA	1a	6	2.0349e-14	2.57515	0.0019821	0.916831	0.0007877	0.0110116	6.84e-05	0.0014078	1.7e-05	2.9e-05	1.27e-05	99.6787	2.79782	0.0061722	65.7966	0.140522
36829-07	430PRA	1a	6	1.8881e-14	2.38943	0.0024452	0.853076	0.0007284	0.0102684	7.53e-05	0.0012798	1.53e-05	1.95e-05	1.3e-05	99.7704	2.79262	0.0067213	65.6766	0.153034
36829-10	430PRA	1a	6	1.56284e-14	1.97772	0.0014591	0.699906	0.0006395	0.0085388	5.58e-05	0.0011194	2.34e-05	6.51e-05	1.3e-05	99.0329	2.79646	0.0072378	65.7653	0.164786
36829-11	430PRA	1a	6	1.1088e-14	1.40299	0.0012766	0.498781	0.00061	0.0061456	5.19e-05	0.0007876	2.16e-05	1.3e-05	1.24e-05	99.738	2.80355	0.0092141	65.9291	0.209762
36829-12	430PRA	1a	6	2.36655e-14	2.99475	0.0024452	1.06692	0.0008075	0.0129395	7.83e-05	0.0017319	2.53e-05	3.2e-05	1.32e-05	99.6965	2.79648	0.0058072	65.7657	0.132214
36829-13	430PRA	1a	6	3.43322e-14	4.34424	0.0026342	1.54673	0.0009961	0.0187584	9.31e-05	0.0022759	3.2e-05	3.54e-05	1.4e-05	99.7708	2.8003	0.0048387	65.854	0.110159
36829-16	430PRA	1a	6	1.39379e-14	1.76432	0.0014591	0.622744	0.00061	0.007385	3.68e-05	0.0009533	1.45e-05	4.97e-05	1.27e-05	99.1726	2.80778	0.0078399	66.0267	0.178468
36829-17	430PRA	1a	6	2.10031e-14	2.65839	0.0020734	0.942643	0.001006	0.0113693	7.63e-05	0.0015314	2.72e-05	7.44e-05	1.32e-05	99.1798	2.7951	0.0064998	65.7339	0.147986
36829-19	430PRA	1a	6	2.06206e-14	2.60974	0.0020734	0.927615	0.0008472	0.0112847	5.68e-05	0.0013947	1.62e-05	6.78e-05	1.31e-05	99.2386	2.79005	0.006333	65.6172	0.144196
36829-20	430PRA	2	6	1.72355e-14	2.18224	0.0024083	0.779055	0.0008439	0.0093505	4.24e-05	0.0007325	1.46e-05	3.14e-05	1.63e-05	99.5858	2.78712	0.008475	65.5496	0.192975
36829-21	430PRA	2	6	1.8821e-14	2.38313	0.0026173	0.849848	0.0008041	0.0102239	6.89e-05	0.000864	1.89e-05	4.53e-05	1.61e-05	99.4486	2.78632	0.0078945	65.531	0.17976
36829-22	430PRA	2	6	1.74096e-14	2.2043	0.0024083	0.785372	0.0007345	0.0094857	6.1e-05	0.0007104	2.07e-05	4.87e-05	1.64e-05	99.3551	2.78618	0.0083079	65.5278	0.189172
36829-23	430PRA	2	6	2.14356e-14	2.71406	0.0027659	0.958383	0.0007544	0.011588	6.99e-05	0.0013335	2.26e-05	0.0001074	1.77e-05	98.8401	2.79666	0.0076065	65.77	0.173179
36829-24	430PRA	2	6	2.4072e-14	3.04816	0.0027659	1.07539	0.0009933	0.0130165	7.88e-05	0.0007092	1.38e-05	0.0001559	1.63e-05	98.483	2.78907	0.0069466	65.5945	0.15817
36829-25	430PRA	2	6	2.63862e-14	3.34091	0.0029206	1.18736	0.0010033	0.0144705	7.58e-05	0.0010513	1.63e-05	3.66e-05	1.7e-05	99.6872	2.80249	0.0065833	65.9046	0.149874
36829-26	430PRA	2	6	1.53366e-14	1.94193	0.0022204	0.688997	0.0007245	0.0083247	5.81e-05	0.0006306	1.28e-05	5.77e-05	1.64e-05	99.1266	2.79146	0.0091639	65.6497	0.20865
36829-27	430PRA	2	6	1.58914e-14	2.01219	0.0022804	0.715372	0.0007643	0.0084163	3.86e-05	0.0007053	1.89e-05	1.77e-05	1.59e-05	99.7518	2.80337	0.0087907	65.9249	0.200124
36829-29	430PRA	2	6	2.39664e-14	3.03481	0.0028425	1.07325	0.0009534	0.0127133	4.63e-05	0.0009905	2.26e-05	0.0001102	1.64e-05	98.9295	2.79499	0.0069407	65.7313	0.158025
36829-30	430PRA	3a	6	2.3492e-14	2.97453	0.0035	1.05864	0.0007854	0.012814	7.51e-05	0.0006986	1.41e-05	4.61e-05	1.72e-05	99.5523	2.79442	0.0067902	65.7181	0.154599
36829-31	430PRA	3a	6	1.88941e-14	2.39188	0.0032249	0.850415	0.0008251	0.0103459	7.32e-05	0.0005431	1.74e-05	5.65e-05	1.7e-05	99.3096	2.79042	0.0080785	65.6257	0.183939
36829-32	430PRA	3a	6	1.91408e-14	2.42342	0.0033287	0.864152	0.0006763	0.0104184	6.43e-05	0.0007179	1.41e-05	4.08e-05	1.71e-05	99.5166	2.78807	0.0078884	65.5715	0.179616
36829-33	430PRA	3a	6	9.34961e-15	1.18358	0.0030463	0.416239	0.0007655	0.0049668	3.27e-05	0.0002241	1.14e-05	9.05e-05	1.68e-05	97.7291	2.7762	0.0154386	65.2973	0.351586
36829-34	430PRA	3a	6	1.66295e-14	2.10505	0.0032757	0.748927	0.0007159	0.0087935	4.4e-05	0.0005026	1.41e-05	3.49e-05	1.7e-05	99.5189	2.79447	0.0089719	65.7193	0.204271
36829-36	430PRA	3a	6	1.92208e-14	2.43364	0.0033287	0.866994	0.0008251	0.0103748	6.73e-05	0.0006027	1.74e-05	5.78e-05	1.71e-05	99.3069	2.78477	0.0080409	65.4952	0.183096
36829-37	430PRA	3a	6	1.50342e-14	1.90361	0.0032249	0.673559	0.0006961	0.0079507	3.73e-05	0.0004413	1.28e-05	6.6e-05	1.69e-05	98.9791	2.79457	0.0098329	65.7215	0.223873
36829-38	430PRA	3a	6	3.0081e-14	3.80871	0.0038897	1.30094	0.0011038	0.0155849	5.17e-05	0.000687	1.57e-05	0.0005289	1.98e-05	95.8643	2.80383	0.0066664	65.9355	0.151761
36829-39	430PRA	3a	6	1.44191e-14	1.82566	0.0036878	0.654218	0.0012035	0.0078881	4.78e-05	0.0004552	1.65e-05	3.25e-05	1.69e-05	99.4847	2.77346	0.0113259	65.234	0.257935
36829-40	430PRA	3a	6	2.2716e-14	2.87615	0.0035	1.00887	0.0009246	0.0120786	6.82e-05	0.0006647	2.09e-05	0.0001803	1.78e-05	98.1425	2.79515	0.0073944	65.7349	0.168353
36829-41	430PRA	3a	6	1.88043e-14	2.38094	0.0033287	0.844829	0.0008351	0.0100684	6.14e-05	0.0003829	1.2e-05	4.61e-05	1.65e-05	99.4318	2.79945	0.0080795	65.8343	0.183941
36829-42	430PRA	3a	6	2.5342e-14	3.20874	0.0037537	1.1437	0.0008848	0.0137963	8.6e-05	0.0007497	1.33e-05	3.56e-05	1.72e-05	99.684	2.79392	0.0065502	65.7066	0.149136
36829-43	430PRA	3a	6	1.83867e-14	2.32821	0.0036878	0.824315	0.0011038	0.0098859	7.41e-05	0.0005689	1.33e-05	3.3e-05	1.71e-05	99.5922	2.81011	0.0090492	66.0805	0.20599
36829-44	430PRA	3a	6	1.76255e-14	2.23182	0.0031765	0.794582	0.0008251	0.0093361	4.02e-05	0.0004576	1.41e-05	3.04e-05	1.7e-05	99.6066	2.79496	0.0085749	65.7306	0.195232
36829-45	430PRA	5a	6	3.22599e-14	4.0827	0.002535	1.45421	0.0012013	0.0174314	8.76e-05	0.0002523	9.5901e-06	5.34e-05	1.31e-05	99.6208	2.79306	0.0052396	65.6866	0.119297
36829-46	430PRA	5a	6	8.13398e-15	1.02949	0.0009571	0.365959	0.0005429	0.0044438	4.22e-05	6.6e-05	8.6267e-06	1.83e-05	1.17e-05	99.4823	2.79475	0.0113061	65.7258	0.257416
36829-48	430PRA	5a	6	1.69547e-14	2.14534	0.0014616	0.76362	0.0008219	0.0091288	4.22e-05	0.0001758	8.84138e-06	2.94e-05	1.3e-05	99.6047	2.79452	0.0071353	65.7204	0.162455
36829-49	430PRA	5a	6	2.00818e-14	2.54067	0.0019459	0.904078	0.0011014	0.0106915	4.12e-05	0.0002181	9.74525e-06	4.85e-05	1.31e-05	99.4447	2.79081	0.0068975	65.6348	0.15705
36829-50	430PRA	5a	6	2.54865e-14	3.22445	0.0022397	1.11504	0.0008119	0.0134909	7.37e-05	0.0002461	9.1351e-06	0.0003623	1.39e-05	96.6589	2.79137	0.0060568	65.6477	0.137905
36829-51	430PRA	5a	6	1.7867e-14	2.26052	0.0019459	0.80815	0.0008718	0.0097718	6.68e-05	0.000193	9.06091e-06	4.21e-05	1.3e-05	99.4596	2.77824	0.007081	65.3444	0.161253
36829-52	430PRA	5a	6	1.04578e-14	1.3233	0.0010846	0.467626	0.0005528	0.0054763	2.79e-05	0.0001015	8.91403e-06	4.58e-05	1.2e-05	98.9786	2.79709	0.0093565	65.7799	0.213021
36829-53	430PRA	5a	6	3.86773e-14	4.89399	0.0029303	1.74489	0.0013012	0.020769	8.66e-05	0.0004185	1.16e-05	5.32e-05	1.39e-05	99.6909	2.79227	0.0049477	65.6686	0.112653
36829-54	430PRA	5a	6	2.96619e-14	3.75339	0.0027325	1.32303	0.0009716	0.0156676	5.2e-05	0.0002317	9.90202e-06	0.0001469	1.39e-05	98.8423	2.8003	0.0055645	65.8539	0.126683
36829-56	430PRA	6a	6	1.93905e-14	2.45333	0.0023984	0.87492	0.0011077	0.0104625	6.97e-05	0.0001435	1.07e-05	4.08e-05	1.41e-05	99.5171	2.78643	0.007499	65.5336	0.170753
36829-57	430PRA	6a	6	1.70937e-14	2.16284	0.0021124	0.772962	0.0011077	0.0093208	5.98e-05	0.0001592	1.05e-05	6.62e-05	1.41e-05	99.1042	2.76899	0.0081696	65.1308	0.186066
36829-58	430PRA	6a	6	3.4005e-14	4.30268	0.0025908	1.53211	0.001406	0.0184549	7.96e-05	0.0002699	1.16e-05	6.61e-05	1.56e-05	99.5565	2.79178	0.0055691	65.6572	0.1268
36829-60	430PRA	6a	6	2.25934e-14	2.85893	0.0019242	1.01894	0.0008994	0.0123433	6.77e-05	0.0001846	1.03e-05	4.61e-05	1.41e-05	99.5342	2.78862	0.0062554	65.5843	0.142434
36829-62	430PRA	6a	6	1.67184e-14	2.11513	0.001831	0.751601	0.0007316	0.0092733	5.98e-05	0.0001234	9.85951e-06	1.97e-05	1.37e-05	99.7365	2.80263	0.0074622	65.9078	0.16988
36829-63	430PRA	6a	6	2.82404e-14	3.57226	0.0025908	1.2637	0.0009985	0.015045	5.2e-05	0.0002173	1.03e-05	0.0001046	1.56e-05	99.14	2.79841	0.005956	65.8104	0.1356
36829-64	430PRA	6a	6	1.68699e-14	2.1338	0.0015564	0.757929	0.0007316	0.0089285	4.32e-05	0.0001211	9.66747e-06	5.78e-05	1.41e-05	99.2046	2.78881	0.007434	65.5886	0.169268
36829-65	430PRA	6a	6	3.10109e-14	3.92194	0.0024945	1.38633	0.0009886	0.0167137	7.86e-05	0.0002344	1.42e-05	0.000138	1.56e-05	98.9639	2.79559	0.0055919	65.7451	0.127314
36829-66	430PRA	6a	6	2.22311e-14	2.81146	0.002018	1.00025	0.0009093	0.0118096	4.61e-05	0.0001643	1.03e-05	4.36e-05	1.4e-05	99.5506	2.79401	0.0063586	65.7087	0.144773
36829-67	430PRA	6a	6	2.77253e-14	3.5063	0.0033693	1.25403	0.0009093	0.0152197	8.86e-05	0.0001507	9.99049e-06	5.49e-05	1.49e-05	99.5434	2.77916	0.006023	65.3657	0.137159
36829-69	430PRA	6a	6	1.77808e-14	2.24896	0.0019242	0.797608	0.001207	0.0097695	6.77e-05	0.0001499	1.01e-05	4.57e-05	1.49e-05	99.4102	2.79888	0.0082696	65.8212	0.188271
36829-70	430PRA	6a	6	1.69723e-14	2.14692	0.0019242	0.762289	0.000771	0.0092001	6.87e-05	0.0001278	9.54254e-06	2.18e-05	1.37e-05	99.711	2.80415	0.0074849	65.9428	0.170394
36829-71	430PRA	6a	6	1.77146e-14	2.24108	0.0019242	0.798553	0.0008599	0.0094641	6.38e-05	0.0001132	9.48103e-06	2.43e-05	1.41e-05	99.6881	2.79355	0.0074485	65.6981	0.16959
36829-72	430PRA	6a	6	1.59357e-14	2.01591	0.002018	0.719524	0.0007612	0.0088071	5.69e-05	0.0001103	9.48103e-06	4.92e-05	1.41e-05	99.2852	2.7776	0.0080002	65.3297	0.182187
36829-73	430PRA	6a	6	1.1557e-14	1.46197	0.0013793	0.505713	0.0006531	0.0060693	3.35e-05	9.3e-05	9.42019e-06	0.0001394	1.4e-05	97.1688	2.80494	0.0102241	65.961	0.232751
36829-74	430PRA	6a	6	1.50278e-14	1.90107	0.001831	0.676399	0.0006923	0.008237	6.18e-05	0.0001005	9.99049e-06	3.73e-05	1.31e-05	99.4283	2.79038	0.0078529	65.6249	0.178804
36829-75	430PRA	6a	6	1.83659e-14	2.32328	0.0023984	0.827446	0.0007218	0.0100474	6.38e-05	9.53e-05	9.48103e-06	5.49e-05	1.41e-05	99.3049	2.78415	0.0073008	65.4808	0.166245
36829-76	430PRA	6a	6	1.57552e-14	1.9931	0.0015564	0.705932	0.0007415	0.0083578	4.03e-05	0.0001158	9.85951e-06	5.37e-05	1.39e-05	99.2095	2.79692	0.0078233	65.7758	0.178115
36829-77	430PRA	6a	6	1.59204e-14	2.01394	0.0014671	0.712773	0.0007415	0.0085807	5.49e-05	9.74e-05	1.01e-05	3.72e-05	1.36e-05	99.4598	2.80609	0.0076109	65.9876	0.17326
36829-78	430PRA	6a	6	2.6289e-14	3.32553	0.0023027	1.18479	0.0008896	0.0141507	6.68e-05	0.0002236	1.33e-05	3.94e-05	1.49e-05	99.6626	2.79325	0.0058619	65.691	0.133466
36829-79	430PRA	6a	6	1.67818e-14	2.12276	0.0014671	0.753385	0.0008401	0.0089359	3.93e-05	0.0001226	1.01e-05	9.53e-06	1.41e-05	99.8798	2.81009	0.0075829	66.0801	0.172612
36829-80	430PRA	6a	6	1.45212e-14	1.83655	0.0014671	0.651622	0.0007513	0.007795	5e-05	0.0001174	1.19e-05	5.28e-05	1.36e-05	99.1573	2.79055	0.008205	65.6288	0.186819
36829-81	430PRA	6a	6	1.83455e-14	2.32015	0.002018	0.823342	0.0008797	0.0098621	4.61e-05	0.0001492	9.48103e-06	8.18e-05	1.41e-05	98.9625	2.78462	0.0073778	65.4917	0.167999
36829-83	430PRA	6a	6	1.56778e-14	1.98303	0.0013793	0.704417	0.000712	0.0084152	3.64e-05	0.0001422	9.85951e-06	4.48e-05	1.4e-05	99.343	2.79251	0.0077262	65.6739	0.175914
36829-85	430PRA	6a	6	3.05724e-14	3.86717	0.0024945	1.34884	0.0011077	0.016098	7.07e-05	0.000225	1.05e-05	0.0003113	1.64e-05	97.6103	2.79441	0.006004	65.7178	0.136699
36829-87	430PRA	6a	6	1.42638e-14	1.80439	0.0016469	0.640275	0.0006923	0.0077961	5.2e-05	0.0001099	9.99049e-06	2.73e-05	1.33e-05	99.5645	2.80172	0.0082033	65.8868	0.186755
36829-88	430PRA	6a	6	1.48466e-14	1.87813	0.0014671	0.665906	0.0007021	0.0078774	3.74e-05	0.0001159	9.99049e-06	5.45e-05	1.37e-05	99.1483	2.79226	0.0080246	65.6682	0.182709
36829-89	430PRA	6a	6	1.39134e-14	1.76018	0.0012932	0.622881	0.0006727	0.0075494	6.77e-05	9.59e-05	9.60469e-06	2e-05	1.35e-05	99.6748	2.8125	0.0082586	66.1358	0.187988
Weighted Mean																2.79406	0.000852476	65.7101	0.0241378
Sample JC13-3			J = 0.013192 ± 2.83645E-06
36840-01	430PRB	1b	6	1.02859e-14	1.30109	0.0020125	0.453409	0.0005707	0.0052909	3.4e-05	0.0006471	1.27e-05	6.4e-05	1.56e-05	98.5451	2.82581	0.0122828	66.1706	0.278875
36840-02	430PRB	1b	6	7.75134e-15	0.980236	0.0011715	0.34363	0.0004342	0.0041361	4.22e-05	0.0006957	1.35e-05	5.28e-05	1.38e-05	98.4118	2.8053	0.0134231	65.6988	0.304844
36840-03	430PRB	1b	6	6.42332e-15	0.812282	0.0011526	0.251453	0.0004245	0.0030686	4.22e-05	0.0006372	1.78e-05	0.0003352	1.45e-05	87.698	2.83103	0.0191274	66.2905	0.434251
36840-04	430PRB	1b	6	8.70979e-15	1.10142	0.0012042	0.388533	0.0005609	0.0047949	5.44e-05	0.0006079	1.27e-05	4.13e-05	1.44e-05	98.8962	2.80153	0.0126814	65.6121	0.288014
36840-05	430PRB	1b	6	9.4691e-15	1.19754	0.0015811	0.42254	0.00061	0.005001	3.4e-05	0.0006423	1.44e-05	3.6e-05	1.4e-05	99.117	2.80712	0.0118878	65.7406	0.26997
36840-06	430PRB	1b	6	8.5467e-15	1.081	0.0011975	0.381983	0.0005022	0.0045653	3.14e-05	0.0006085	1.44e-05	3.31e-05	1.42e-05	99.1025	2.80256	0.0126012	65.6357	0.286187
36840-07	430PRB	1b	6	7.68663e-15	0.972224	0.0012311	0.341652	0.0004827	0.0041292	3.05e-05	0.0005116	1.61e-05	4.73e-05	1.37e-05	98.5617	2.80273	0.0136129	65.6397	0.309165
36840-08	430PRB	1b	6	8.42246e-15	1.06543	0.0015	0.374663	0.0005315	0.0045368	5.06e-05	0.0006142	1.87e-05	3.02e-05	1.43e-05	99.1691	2.81806	0.0132029	65.9922	0.299794
36840-09	430PRB	1b	6	9.55242e-15	1.20851	0.0013014	0.424378	0.0004924	0.0051204	4.22e-05	0.0005196	1.21e-05	4.93e-05	1.4e-05	98.7942	2.81138	0.0113767	65.8388	0.258349
36840-10	430PRB	1b	6	8.54342e-15	1.0809	0.0012311	0.377629	0.00061	0.0045146	3.85e-05	0.0005859	1.27e-05	9.91e-05	1.41e-05	97.2784	2.78245	0.0129926	65.1732	0.295153
36840-11	430PRB	8a	6	9.73411e-15	1.23183	0.0015811	0.43562	0.0005413	0.0052683	4.49e-05	0.0006259	1.27e-05	3.62e-05	1.38e-05	99.138	2.80139	0.0112561	65.6089	0.255644
36840-12	430PRB	8a	6	7.41969e-15	0.938967	0.0012175	0.330028	0.000473	0.0039505	2.88e-05	0.0004739	1.25e-05	4.64e-05	1.47e-05	98.5391	2.80154	0.0147898	65.6124	0.335898
36840-13	430PRB	8a	6	1.30774e-14	1.65499	0.0014213	0.585112	0.00061	0.0069841	4.59e-05	0.0010429	1.7e-05	2.46e-05	1.42e-05	99.5739	2.81443	0.0088347	65.9089	0.200616
36840-14	430PRB	8a	6	6.47179e-15	0.818635	0.0012518	0.289415	0.0003956	0.0034709	2.88e-05	0.0005263	1.22e-05	3.02e-05	1.37e-05	98.9177	2.79597	0.0156505	65.4842	0.355471
36840-15	430PRB	8a	6	7.65177e-15	0.967747	0.0012311	0.341289	0.0004827	0.0040839	3.22e-05	0.0005462	1.35e-05	7.54e-06	1.4e-05	99.784	2.82741	0.0137962	66.2073	0.31323
36840-16	430PRB	1b	6	1.10621e-14	1.39892	0.0012942	0.495184	0.0005413	0.0059668	5.25e-05	0.0007422	1.44e-05	3.94e-05	1.45e-05	99.1756	2.79975	0.0102118	65.5711	0.231931
36840-17	430PRB	1b	6	1.5428e-14	1.95501	0.0018358	0.677249	0.0006987	0.0082664	6.21e-05	0.0010265	1.52e-05	0.0001998	1.46e-05	96.9643	2.79705	0.008379	65.5091	0.190309
36840-18	430PRB	1b	6	6.74438e-15	0.854522	0.0010445	0.292628	0.0004245	0.0035908	4.03e-05	0.0004876	1.22e-05	0.0001117	1.41e-05	96.1135	2.80466	0.0158394	65.6842	0.359723
36840-19	430PRB	1b	6	9.02845e-15	1.14361	0.0011975	0.404786	0.0005413	0.0047248	3.05e-05	0.0005489	1.27e-05	3.42e-05	1.35e-05	99.1213	2.79836	0.0115935	65.5392	0.263316
36840-20	430PRB	1b	6	8.81818e-15	1.11603	0.00204	0.394856	0.0004966	0.0048651	4.54e-05	0.0004239	1.28e-05	4.01e-05	1.56e-05	98.9446	2.79414	0.013983	65.4422	0.317605
36840-21	430PRB	1b	6	8.3041e-15	1.05097	0.0019578	0.3737	0.0005065	0.0044397	3.2e-05	0.0003706	1.22e-05	4.06e-05	1.55e-05	98.8625	2.77789	0.0145348	65.0682	0.330205
36840-22	430PRB	1b	6	8.43578e-15	1.06767	0.0021095	0.380576	0.0005658	0.0045097	3.2e-05	0.0003765	1.21e-05	1.75e-05	1.53e-05	99.5273	2.78969	0.0144599	65.3398	0.328454
36840-23	430PRB	1b	6	8.55081e-15	1.08218	0.00204	0.382758	0.0005362	0.0046592	4.44e-05	0.000343	1.13e-05	5.7e-05	1.58e-05	98.4429	2.78085	0.0145591	65.1364	0.330745
36840-24	430PRB	1b	6	8.0535e-15	1.01922	0.0020036	0.36091	0.0005658	0.0042862	2.82e-05	0.0003679	1.71e-05	2.24e-05	1.53e-05	99.3589	2.80345	0.0150603	65.6564	0.342033
36840-25	430PRB	2	6	7.9753e-15	1.00935	0.0021095	0.357705	0.0005263	0.0042716	2.92e-05	0.0003081	1.09e-05	3e-05	1.54e-05	99.1251	2.79458	0.0153298	65.4522	0.348193
36840-26	430PRB	2	6	7.01598e-15	0.88792	0.0019698	0.314073	0.0004081	0.0037619	2.64e-05	0.0003471	1.22e-05	3.08e-05	1.54e-05	98.9837	2.79591	0.0168491	65.483	0.382694
36840-27	430PRB	2	6	6.90058e-15	0.87332	0.0019992	0.308441	0.0004966	0.0037138	3.86e-05	0.0002822	1.07e-05	1.87e-05	1.52e-05	99.3761	2.81126	0.0172571	65.8358	0.391887
36840-28	430PRB	2	6	7.04153e-15	0.891205	0.0019739	0.303446	0.0004868	0.0035761	3.67e-05	0.0010948	1.46e-05	0.0001437	1.55e-05	95.242	2.7948	0.0178583	65.4572	0.405622
36840-29	430PRB	2	6	7.95611e-15	1.00701	0.0021633	0.33537	0.0004474	0.0041108	3.76e-05	0.0004233	1.63e-05	0.0002261	1.6e-05	93.3134	2.79948	0.0168692	65.5651	0.383135
36840-31	430PRB	2	6	7.34483e-15	0.929028	0.0009571	0.327804	0.0004634	0.0038988	2.6e-05	8.49e-05	7.9511e-06	1.56e-05	1.16e-05	99.5142	2.81645	0.0122214	65.9552	0.277515
36840-32	430PRB	2	6	6.75324e-15	0.854242	0.0007992	0.29397	0.0004535	0.0035733	4.12e-05	6.96e-05	8.34865e-06	8.05e-05	1.17e-05	97.2001	2.82065	0.0135701	66.0519	0.308122
36840-33	430PRB	2	6	1.02954e-14	1.30259	0.0010846	0.454059	0.0005429	0.0053695	3.07e-05	9.44e-05	8.08084e-06	8.92e-05	1.2e-05	97.9677	2.80661	0.0096344	65.729	0.218797
36840-34	430PRB	2	6	7.92608e-15	1.00286	0.0009841	0.352579	0.0005429	0.0041708	2.88e-05	8.09e-05	8.01561e-06	3.71e-05	1.21e-05	98.9114	2.80953	0.0120535	65.7962	0.273726
36840-35	430PRB	2	6	1.28561e-14	1.62691	0.0010284	0.57362	0.0005626	0.0069732	5.97e-05	0.0001588	1.21e-05	3.72e-05	1.19e-05	99.3354	2.81348	0.007839	65.8871	0.178008
36840-36	430PRB	5a	6	1.05921e-14	1.34039	0.0009315	0.473399	0.0006024	0.0056168	3.81e-05	0.0003453	1.49e-05	3.84e-05	1.15e-05	99.1916	2.80467	0.0090404	65.6844	0.205312
36840-37	430PRB	5a	6	1.32594e-14	1.67787	0.0012238	0.590741	0.0006622	0.0069367	3.52e-05	0.0001274	1.04e-05	3.97e-05	1.22e-05	99.308	2.81673	0.0080512	65.9617	0.18282
36840-39	430PRB	5a	6	9.03178e-15	1.14273	0.0009508	0.400929	0.0005327	0.0047958	2.85e-05	0.0001155	9.38616e-06	6.1e-05	1.14e-05	98.4244	2.80144	0.0102576	65.61	0.232966
36840-87	430PRB	5a	6	8.21067e-15	1.03982	0.0012021	0.350077	0.0004527	0.0042501	3.05e-05	2.96e-05	1.46e-05	0.0001799	1.73e-05	94.8842	2.8122	0.0163441	65.8576	0.371148
36840-88	430PRB	5d	6	1.16409e-14	1.47416	0.0013932	0.516208	0.0005123	0.0064072	5.92e-05	6.07e-05	1.44e-05	6.34e-05	1.76e-05	98.7912	2.8151	0.0116543	65.9242	0.264641
36840-89	430PRB	5d	6	7.54684e-15	0.955782	0.0012897	0.331599	0.0004228	0.0039746	2.77e-05	3.27e-05	1.43e-05	0.000106	1.74e-05	96.7495	2.78259	0.0171315	65.1766	0.389174
36840-90	430PRB	5d	6	4.32028e-15	0.547112	0.0011406	0.191561	0.0002254	0.0022871	2.25e-05	-1.78531e-06	1.45e-05	2.28e-05	1.72e-05	98.7506	2.8142	0.028083	65.9036	0.637705
36840-91	430PRB	5d	6	1.07379e-14	1.35984	0.001622	0.476456	0.0005323	0.005794	2.95e-05	1.74e-05	1.51e-05	4e-05	1.8e-05	99.1467	2.82354	0.0129088	66.1183	0.293096
36840-92	430PRB	8a	6	8.67714e-15	1.09879	0.0012702	0.384789	0.0005422	0.0045362	3.7e-05	7.46583e-06	1.48e-05	6.7e-05	1.74e-05	98.1905	2.79775	0.0151109	65.5251	0.343207
36840-93	430PRB	8a	6	6.38292e-15	0.808245	0.0012637	0.280634	0.0004427	0.0032915	2.42e-05	-8.1759e-06	1.43e-05	3.32e-05	1.73e-05	98.7558	2.83799	0.0200117	66.4506	0.454287
36840-94	430PRB	8a	6	8.34335e-15	1.0565	0.0012963	0.372501	0.0004825	0.0045021	4.08e-05	-1.82588e-06	1.7e-05	3.67e-05	1.72e-05	98.9596	2.80057	0.0153029	65.5902	0.347556
36840-95	430PRB	8a	6	5.4112e-15	0.68521	0.0011732	0.233827	0.0002941	0.0028094	2.42e-05	6.28916e-06	1.7e-05	7.05e-05	1.74e-05	96.9425	2.83462	0.0235865	66.3732	0.535461
36840-96	430PRB	8a	6	8.7518e-15	1.10819	0.001303	0.385879	0.0005024	0.0045415	3.05e-05	3.65177e-06	1.7e-05	8.05e-05	1.75e-05	97.8352	2.80354	0.0150735	65.6583	0.342332
36840-97	430PRB	8a	6	5.23012e-15	0.662219	0.0011102	0.227324	0.0003336	0.0028074	2.59e-05	6.16743e-06	1.48e-05	7.05e-05	1.75e-05	96.838	2.81483	0.0243715	65.9181	0.553421
36840-98	430PRB	8a	6	6.29535e-15	0.797145	0.0014666	0.268792	0.0003831	0.0032359	3.42e-05	2.93e-05	1.49e-05	0.0001574	1.73e-05	94.1685	2.78666	0.0209956	65.2701	0.47693
36840-99	430PRB	8a	6	7.50153e-15	0.949881	0.0011962	0.328098	0.0004825	0.0038149	4.08e-05	4.21e-05	1.7e-05	7.64e-05	1.72e-05	97.6777	2.82174	0.0172345	66.0769	0.391321
36840-100	430PRB	8a	6	6.74302e-15	0.853911	0.0012385	0.295446	0.0004527	0.0036133	3.89e-05	-3.73292e-06	1.51e-05	6.72e-05	1.73e-05	97.6428	2.81592	0.0190309	65.9431	0.432143
36840-101	430PRB	8a	6	9.99555e-15	1.26567	0.0014666	0.441637	0.0005323	0.0054581	5.43e-05	2.06e-05	1.47e-05	4.8e-05	1.72e-05	98.899	2.8281	0.013254	66.2233	0.300916
36840-102	430PRB	8a	6	8.79364e-15	1.11361	0.0013932	0.390806	0.0005123	0.0045673	2.77e-05	3.22e-05	1.7e-05	4.82e-05	1.71e-05	98.7602	2.80804	0.0146713	65.7619	0.333181
36840-103	430PRB	8a	6	1.26963e-14	1.60771	0.0017863	0.564848	0.0005721	0.0066246	3.7e-05	1.33e-05	1.44e-05	6.28e-05	1.76e-05	98.8483	2.80732	0.0110658	65.7454	0.251302
36840-105	430PRB	8a	6	7.512e-15	0.951095	0.0013507	0.331246	0.0005024	0.0041605	4.08e-05	-6.93836e-06	1.5e-05	3.24e-05	1.73e-05	98.9718	2.83548	0.0172787	66.3928	0.392257
36840-30	430PRB	5a	6	8.61217e-15	1.08933	0.0010387	0.365031	0.000533	0.0046172	4.32e-05	0.0001553	8.98721e-06	0.0001357	1.17e-05	96.3095	2.87017	0.0115746	67.1902	0.262648
Weighted Mean																2.80707	0.00175416	65.7397	0.0422947
Sample PH13-3			J = 0.013222 ± 4.61446E-06
37013-08	443PRB	11c	6	1.44163e-14	1.82666	0.0013159	0.649522	0.0005432	0.007699	6.71e-05	0.000206	1.56e-05	1.87e-06	1.69e-05	99.9812	2.80848	0.0085959	65.9209	0.197744
37013-09	443PRB	11c	6	6.31876e-15	0.800454	0.0008605	0.281687	0.0003549	0.0032879	2.77e-05	0.0001102	2e-05	3.31e-05	1.61e-05	98.7794	2.80366	0.017812	65.81	0.409782
37013-12	443PRB	11c	6	1.07194e-14	1.35796	0.0011365	0.481525	0.0004737	0.0056559	4.85e-05	0.0001975	2e-05	2.04e-05	1.64e-05	99.5659	2.80458	0.0109922	65.8312	0.252882
37013-19	443PRB	11c	6	4.76343e-15	0.60342	0.0006661	0.215529	0.0002085	0.0025104	2.59e-05	0.0001011	1.49e-05	1.4e-05	1.59e-05	99.3254	2.77754	0.0224729	65.2078	0.517181
37013-36	443PRB	15a	6	6.97256e-15	0.88368	0.001288	0.31124	0.0003823	0.0038023	4.11e-05	2.27e-05	1.31e-05	3.06e-05	1.07e-05	99.0185	2.80515	0.0120134	65.8442	0.276374
37013-48	443PRB	15b	6	2.35641e-15	0.29849	0.000542	0.106344	0.0001449	0.0012475	2.05e-05	2.31785e-06	9.48736e-06	1.46e-05	1.17e-05	98.5577	2.76018	0.0337221	64.8074	0.776237
37013-49	443PRB	15b	6	1.51127e-14	1.9146	0.0011484	0.680602	0.0005935	0.0082469	5.58e-05	5.08e-05	1.06e-05	4.08e-05	1.29e-05	99.4171	2.7905	0.0069964	65.5065	0.160986
37013-52	443PRB	15b	6	4.49081e-15	0.568934	0.0009118	0.199199	0.0002291	0.0023775	3.13e-05	1.95e-05	9.32952e-06	3.17e-05	1.24e-05	98.4069	2.80439	0.0196131	65.8267	0.451212
37013-56	443PRB	15b	6	4.30315e-15	0.545026	0.0007024	0.193996	0.0001723	0.0023442	3.13e-05	1.79e-05	1.01e-05	2.49e-05	1.23e-05	98.7048	2.76693	0.0196486	64.9631	0.452247
37013-57	443PRB	15b	6	2.46423e-15	0.312134	0.0006329	0.111343	0.0001539	0.0013124	1.98e-05	7.15598e-06	9.54149e-06	1.55e-05	1.17e-05	98.5615	2.75687	0.0322414	64.7311	0.742185
37013-65	443PRB	15b	6	4.30607e-15	0.545451	0.0007112	0.192604	0.0002005	0.0022631	2.52e-05	-6.61953e-06	1.18e-05	2.55e-05	1.25e-05	98.5775	2.78543	0.0201603	65.3896	0.463913
37013-68	443PRB	15b	6	8.77503e-15	1.11149	0.0009305	0.391455	0.0003952	0.0047378	4.81e-05	1.84e-05	9.59635e-06	3.07e-05	1.27e-05	99.2102	2.81067	0.0107589	65.9714	0.247495
37013-69	443PRB	15b	6	6.09494e-15	0.771968	0.0008377	0.270892	0.0003068	0.0031644	2.44e-05	9.75724e-06	9.27847e-06	3.79e-05	1.23e-05	98.5592	2.8024	0.0145762	65.7808	0.335344
37013-01	443PRB	11b	6	7.08683e-15	0.897946	0.0011775	0.0006454	7.57e-05	0.0001716	2.26e-05	-8.90561e-06	2.19e-05	0.0002507	1.33e-05	91.6649	1274.05	154.988	5210.17	207.172
37013-02	443PRB	11b	6	2.48811e-14	3.15254	0.0018484	0.719204	0.0005425	0.0085224	3.85e-05	0.0001314	2.5e-05	0.0001288	1.41e-05	98.7839	4.32538	0.0078829	100.551	0.177902
37013-03	443PRB	11b	6	4.54686e-17	0.0057613	0.0005048	0.0001682	7.5e-05	9.15551e-06	1.84e-05	2.23e-05	1.72e-05	1.01e-05	1.25e-05	48.2268	16.5224	23.6833	357.236	463.728
37013-04	443PRB	11b	6	2.83681e-14	3.59445	0.0020436	0.53487	0.0004133	0.0065265	5.15e-05	1.38e-05	2.27e-05	0.0002471	1.49e-05	97.9477	6.57555	0.0116098	150.729	0.254835
37013-05	443PRB	11b	6	2.17836e-14	2.75995	0.0020436	0.923506	0.0005823	0.0110206	6.31e-05	0.000113	2.27e-05	0.0002121	1.49e-05	97.709	2.91669	0.0060451	68.4134	0.138873
37013-06	443PRB	11b	6	2.37934e-15	0.301454	0.0007161	0.0008265	8.09e-05	8.47e-05	2.26e-05	3.64e-05	1.74e-05	0.0001356	1.37e-05	86.5869	315.631	32.4322	2971.45	149.548
37013-07	443PRB	11c	6	1.46726e-15	0.18589	0.0007852	0.0087906	9.62e-05	0.0001595	1.63e-05	-2.41e-05	1.92e-05	8.81e-05	1.62e-05	85.839	18.134	0.593899	388.582	11.4289
37013-10	443PRB	11c	6	3.44118e-15	0.435947	0.0009902	0.0045837	8.78e-05	0.000105	1.54e-05	-8.80441e-06	1.92e-05	7.47e-05	1.66e-05	94.8846	90.1578	2.10352	1418.99	22.8924
37013-11	443PRB	11c	6	1.17839e-14	1.49286	0.0015005	0.358984	0.0004241	0.0042866	3.05e-05	2.28e-05	1.84e-05	0.0001292	1.65e-05	97.4176	4.04675	0.0154968	94.2393	0.350954
37013-13	443PRB	11c	6	8.20908e-15	1.03981	0.0009569	0.0027575	9.54e-05	4.25e-05	1.92e-05	1.06e-05	1.92e-05	6.14e-05	1.63e-05	98.2387	370.113	13.3994	3207.15	54.2339
37013-14	443PRB	11c	6	7.63957e-15	0.967546	0.0010325	0.0037044	9.54e-05	0.0002546	2.08e-05	2.22e-05	1.92e-05	9.53e-05	1.65e-05	97.0631	253.298	6.90196	2657.69	37.8571
37013-15	443PRB	11c	6	6.95242e-15	0.880635	0.0011365	0.0019845	9.08e-05	3.88e-05	2.08e-05	3.33e-05	1.43e-05	7.67e-05	1.61e-05	97.404	431.895	20.6346	3441.83	73.3512
37013-16	443PRB	11c	6	2.57201e-16	0.0325772	0.0005869	0.0007907	7.67e-05	-5.12053e-06	1.92e-05	1e-05	1.48e-05	2.86e-05	1.62e-05	73.8539	30.4036	6.87003	610.916	116.905
37013-17	443PRB	11c	6	7.26572e-16	0.0920365	0.000678	0.0002665	7.54e-05	2.77e-05	1.46e-05	7.46857e-06	1.46e-05	5.88e-05	1.62e-05	80.9385	279.375	84.0246	2795.63	427.019
37013-18	443PRB	11c	6	1.41192e-14	1.78851	0.0012254	0.538255	0.0004836	0.0063476	4.95e-05	0.0004509	2e-05	3.95e-05	1.66e-05	99.3675	3.29803	0.0102316	77.1697	0.233912
37013-20	443PRB	11c	6	2.36789e-16	0.029995	0.0005758	0.0006875	7.73e-05	8.69e-05	1.56e-05	4e-05	1.43e-05	6.32e-05	1.59e-05	37.2795	16.2592	7.22545	352.064	141.883
37013-21	443PRB	11c	6	1.69059e-15	0.214148	0.0007225	0.0019178	7.86e-05	6.66e-05	2e-05	2.77e-05	1.52e-05	0.0001247	1.6e-05	82.622	92.1849	4.66271	1440.97	50.1306
37013-22	443PRB	11c	6	4.89425e-14	6.20147	0.0028516	1.3998	0.0007025	0.0169362	8.19e-05	0.0005191	2.95e-05	3.09e-05	1.78e-05	99.8605	4.41926	0.0057364	102.672	0.129308
37013-23	443PRB	11c	6	1.38756e-15	0.175796	0.0007094	0.0019032	8.85e-05	-1.34e-05	1.92e-05	3.15e-05	1.45e-05	7.35e-05	1.62e-05	87.5294	80.7876	4.66518	1313.81	53.8123
37013-24	443PRB	11c	6	9.30894e-17	0.0117964	0.0005831	0.0002847	7.73e-05	-6.73861e-06	1.49e-05	4.6e-05	1.44e-05	-1.06e-05	1.57e-05	127.117	52.6992	22.2882	955.954	313.37
37013-25	443PRB	11c	6	9.84045e-17	0.0124687	0.0005869	0.0004336	7.67e-05	0.0001487	1.63e-05	-4.32125e-06	1.48e-05	3.5e-05	1.57e-05	16.3248	4.68907	10.924	108.756	245.416
37013-26	443PRB	15a	6	6.80304e-17	0.0086207	0.0011574	-1.47e-05	0.0001148	-1.19e-05	1.55e-05	-1.22e-05	1.32e-05	3.45e-05	1.06e-05	-22.2471	150.98	1443.71	1984.02	11494.4
37013-27	443PRB	15a	6	3.60067e-15	0.456293	0.00146	0.149594	0.0001866	0.001809	2.06e-05	1.16e-05	1.33e-05	8.92e-05	1.08e-05	94.2088	2.86727	0.0244418	67.2755	0.56185
37013-28	443PRB	15a	6	2.75621e-16	0.0349277	0.0011402	0.0034015	0.0001122	3.97e-05	1.91e-05	-2e-05	1.3e-05	1.86e-05	1.06e-05	83.0071	8.49775	1.03722	192.518	22.2468
37013-29	443PRB	15a	6	8.4567e-15	1.07174	0.001434	0.0118753	0.000125	0.0002079	1.64e-05	4.35e-05	1.35e-05	0.0001236	1.09e-05	96.6368	87.0962	1.00271	1385.29	11.1177
37013-30	443PRB	15a	6	7.73777e-15	0.980631	0.0013543	0.329086	0.0003629	0.0038467	2.82e-05	1.33e-05	1.63e-05	4.25e-05	1.18e-05	98.7314	2.93559	0.0123812	68.8483	0.284361
37013-31	443PRB	15a	6	5.22825e-16	0.0662598	0.0011303	0.000142	0.0001101	9.14815e-06	1.53e-05	-9.99003e-06	1.31e-05	5.56e-05	1.1e-05	74.6622	343.732	274.484	3096.85	1180.86
37013-32	443PRB	15a	6	3.60051e-16	0.0456327	0.0011303	0.0056793	0.0001111	9.64e-05	1.5e-05	-3.82597e-06	1.31e-05	1e-05	1.03e-05	93.2887	7.47947	0.598864	170.501	13.0021
37013-33	443PRB	15a	6	5.95409e-15	0.754639	0.0013601	0.256465	0.000296	0.0031818	3.83e-05	1.24e-05	1.32e-05	6.8e-05	1.12e-05	97.342	2.85795	0.014882	67.0608	0.342138
37013-34	443PRB	15a	6	2.94261e-16	0.0372933	0.0011351	0.0002367	0.0001078	4.17e-05	1.58e-05	3.92719e-06	1.3e-05	0.0001043	1.08e-05	16.7128	26.3511	19.2276	540.462	340.194
37013-35	443PRB	15a	6	1.70849e-16	0.0216525	0.0011238	0.0004775	0.0001073	-6.65879e-06	1.84e-05	5.53e-05	1.36e-05	1.17e-05	1.07e-05	88.7952	40.9909	12.1962	782.984	188.696
37013-37	443PRB	15a	6	2.62147e-15	0.332261	0.0012828	0.018278	0.0001212	0.0002129	1.91e-05	-2.79e-05	1.39e-05	6.53e-05	1.07e-05	93.9685	17.0431	0.223895	367.423	4.35932
37013-38	443PRB	15a	6	2.06984e-15	0.26239	0.0012578	0.0003744	0.0001122	8.24e-05	1.84e-05	-3.03648e-06	1.3e-05	0.000302	1.13e-05	65.612	458.253	142.52	3533.37	481.611
37013-39	443PRB	15a	6	2.17103e-15	0.275203	0.0012042	0.0026676	0.0001097	6.14e-05	1.77e-05	1.23484e-06	1.3e-05	0.0002134	1.08e-05	76.858	79.1415	3.62249	1294.68	42.2295
37013-40	443PRB	15a	6	1.13506e-14	1.43802	0.0014732	0.361996	0.0004211	0.0042703	3.09e-05	1.97e-05	1.31e-05	4.09e-05	1.13e-05	99.1776	3.93135	0.011905	91.619	0.270003
37013-41	443PRB	15a	6	3.85957e-15	0.488934	0.0013841	0.0006994	0.0001122	4.13e-05	1.98e-05	2.21e-05	1.3e-05	0.000102	1.12e-05	93.8597	658.442	110.25	4109.09	270.959
37013-42	443PRB	15a	6	2.31652e-17	0.0029344	0.0011218	-4.41e-05	0.0001048	-2.33e-05	1.44e-05	-1.98e-05	1.3e-05	-1.07e-05	1.03e-05	195.821	-141.023	385.307	#NUM!	-10627.4
37013-43	443PRB	15a	6	2.48365e-15	0.314616	0.0011456	0.0059434	0.0001111	0.0001043	1.54e-05	-7.26732e-06	1.31e-05	2.05e-05	1.07e-05	98.0082	51.7675	1.15819	942.779	16.4032
37013-44	443PRB	15a	6	1.64959e-17	0.0020896	0.0011199	-3e-05	0.0001073	-1.28e-05	1.49e-05	6.90294e-06	1.31e-05	-1.2e-05	1.04e-05	278.657	-186.521	674.737	#NUM!	-10975.7
37013-45	443PRB	15a	6	3.03682e-16	0.0384677	0.0011218	0.0006837	0.0001056	4.78e-05	1.52e-05	8.86654e-06	1.3e-05	8.67e-05	1.05e-05	33.1828	18.6737	5.77563	398.957	110.509
37013-46	443PRB	15b	6	3.73397e-16	0.0472983	0.0003808	0.0128177	8.91e-05	0.000176	1.64e-05	6.57905e-06	9.38137e-06	4.77e-05	1.17e-05	70.1466	2.58309	0.275888	60.7183	6.36495
37013-47	443PRB	15b	6	2.17273e-16	0.0275224	0.000408	7.05e-05	7.55e-05	3.25e-05	1.59e-05	1.44e-05	9.54149e-06	7.32e-05	1.2e-05	21.6432	87.3971	113.718	1388.63	1258.54
37013-50	443PRB	15b	6	1.33096e-15	0.168603	0.0006673	0.0589094	9.19e-05	0.0007081	1.98e-05	6.89e-05	9.70824e-06	1.93e-05	1.18e-05	97.4056	2.78217	0.0612051	65.3145	1.40846
37013-51	443PRB	15b	6	3.44161e-15	0.435984	0.000729	0.154721	0.0001816	0.0019264	2.95e-05	1.39e-05	9.27847e-06	3.55e-05	1.2e-05	97.6339	2.74511	0.0241463	64.4597	0.555922
37013-53	443PRB	15b	6	6.82764e-17	0.008649	0.0003859	0.0001515	7.71e-05	-7.59102e-06	1.67e-05	3.54257e-07	9.65194e-06	2.38e-05	1.17e-05	17.8676	10.1848	23.8041	228.415	500.523
37013-54	443PRB	15b	6	1.70564e-16	0.0216084	0.0004022	0.0073157	8.5e-05	8.93e-05	1.63e-05	5.16e-05	1.02e-05	5.86e-06	1.16e-05	96.7039	2.8535	0.479738	66.9584	11.0298
37013-55	443PRB	15b	6	2.94421e-17	0.0037289	0.000408	4.73e-05	7.66e-05	-8.0725e-06	1.63e-05	6.5082e-06	9.48736e-06	4.33e-06	1.13e-05	68.8119	55.4962	120.855	994.936	1662.96
37013-58	443PRB	15b	6	1.02913e-17	0.0013035	0.0003912	-6.22147e-06	7.44e-05	-8.6052e-06	1.84e-05	1.35e-05	9.38137e-06	2.08e-05	1.13e-05	-356.017	538.724	4854.31	3787.2	14255.2
37013-59	443PRB	15b	6	2.484e-16	0.0314654	0.0004201	0.0001969	7.6e-05	-5.32703e-06	1.78e-05	9.14994e-06	9.27847e-06	5.12e-05	1.17e-05	51.9707	83.5649	38.2924	1345.63	433.991
37013-60	443PRB	15b	6	8.75306e-17	0.011087	0.0003966	1.01e-05	7.77e-05	-1.62e-05	1.78e-05	8.25924e-06	9.43398e-06	1.56e-05	1.17e-05	59.5021	765.078	7173.68	4354.32	15394.3
37013-61	443PRB	15b	6	1.95233e-16	0.0247296	0.0003859	0.0017895	8.18e-05	1.5e-05	1.59e-05	-5.68835e-06	9.32952e-06	2.93e-05	1.22e-05	64.1377	8.8404	2.08336	199.866	44.5036
37013-62	443PRB	15b	6	1.46119e-13	18.5078	0.0051107	0.0007059	0.0002581	0.0002349	3.4e-05	-1.5e-05	1.53e-05	0.0012663	2.21e-05	97.9556	25535	9644	10531.4	679.348
37013-63	443PRB	15b	6	4.19062e-14	5.30808	0.0022246	1.16098	0.0006631	0.0136312	4.71e-05	5.05069e-06	1.44e-05	0.0001623	1.61e-05	99.0882	4.52069	0.0069072	104.962	0.155501
37013-64	443PRB	15b	6	3.59661e-17	0.0045559	0.0004201	-5.27e-05	8.37e-05	-8.39007e-06	1.62e-05	3.08709e-06	9.38137e-06	8.87e-06	1.2e-05	43.2265	-36.9299	90.5773	-1211.34	4224.14
37013-66	443PRB	15b	6	2.35737e-17	0.0029859	0.0003912	2.72e-05	8.18e-05	-5.54216e-06	1.54e-05	-1.01e-05	1.15e-05	-8.77e-06	1.19e-05	180.78	186.055	559.383	2244.22	3856.66
37013-67	443PRB	15b	6	9.40058e-15	1.19074	0.0009774	0.383668	0.0003558	0.0047222	4.9e-05	5.56689e-06	9.22822e-06	9.51e-05	1.27e-05	97.6268	3.02322	0.0110706	70.8639	0.253978
Weighted Mean																2.79842	0.00360054	65.6893	0.0852302
Sample PH13-1			J = 0.013089 ± 6.34441E-06
37109-03	456PRA	16b	6	1.39423e-14	1.76772	0.001543	0.618985	0.0005279	0.0073454	5.63e-05	0.0004147	1.05e-05	4.01e-05	1.31e-05	99.343	2.8339	0.0079163	65.8483	0.177868
37109-04	456PRA	16b	6	8.4318e-15	1.0691	0.001543	0.372949	0.0004005	0.004332	2.68e-05	0.0002074	9.74525e-06	3.99e-05	1.29e-05	98.902	2.83198	0.0120611	65.8045	0.271003
37109-05	456PRA	16b	6	1.21307e-14	1.5382	0.001543	0.540409	0.0004493	0.0064645	4.46e-05	0.0002629	9.93579e-06	2.76e-05	1.34e-05	99.4803	2.8284	0.0088826	65.7227	0.199593
37109-07	456PRA	16b	6	6.14719e-15	0.779445	0.0013932	0.273679	0.0003231	0.003215	2.25e-05	9.71e-05	8.93588e-06	-7.81e-06	1.27e-05	100.31	2.85366	0.0155063	66.2991	0.348319
37109-08	456PRA	16b	6	1.20427e-14	1.5269	0.0020447	0.536582	0.000597	0.0063864	4.56e-05	0.000264	9.87168e-06	1.87e-05	1.31e-05	99.6509	2.83249	0.0094086	65.8161	0.211402
37109-10	456PRA	16b	6	1.72166e-14	2.18283	0.0019573	0.768459	0.0005673	0.0091678	6.61e-05	0.000426	1.05e-05	2.13e-05	1.39e-05	99.7257	2.82957	0.0070725	65.7495	0.158917
37109-13	456PRA	16b	6	9.93136e-15	1.2592	0.001622	0.441146	0.0004984	0.0051645	3.23e-05	0.0002282	9.80816e-06	1.27e-05	1.28e-05	99.7144	2.84306	0.010495	66.0572	0.23578
37109-14	456PRA	16b	6	1.05654e-14	1.33965	0.001622	0.467633	0.0004689	0.0055821	4.27e-05	0.0003116	9.87168e-06	2.11e-05	1.31e-05	99.551	2.84869	0.0100401	66.1858	0.225545
37109-17	456PRA	16b	6	7.36501e-15	0.933903	0.0014666	0.327183	0.0004787	0.0037801	2.59e-05	0.0002426	9.68298e-06	2.07e-05	1.27e-05	99.3622	2.83299	0.0135953	65.8276	0.305472
37109-18	456PRA	16b	6	3.6222e-15	0.459311	0.001251	0.16048	0.0002017	0.0019438	2.95e-05	7.62e-05	8.73213e-06	-9.80001e-07	1.24e-05	100.079	2.86116	0.0249778	66.4703	0.561026
37109-19	456PRA	16b	6	9.64409e-15	1.22289	0.001543	0.428784	0.0003616	0.0049316	2.86e-05	0.0001383	9.04268e-06	1.35e-05	1.28e-05	99.6791	2.83964	0.0104416	65.9793	0.234592
37109-20	456PRA	16b	6	1.15643e-14	1.46636	0.0017032	0.515993	0.0004297	0.006192	5.14e-05	0.0002791	9.62133e-06	1.98e-05	1.29e-05	99.6135	2.82764	0.0091149	65.7056	0.204815
37109-21	456PRA	16b	6	6.19125e-15	0.785027	0.0013577	0.276253	0.0003231	0.0033625	3.89e-05	0.000126	8.88369e-06	1.08e-05	1.26e-05	99.6046	2.82727	0.0152672	65.6971	0.343062
37109-23	456PRA	16b	6	5.43653e-15	0.689234	0.0013438	0.241563	0.0002473	0.0029607	3.7e-05	0.0001664	9.74525e-06	2.36e-05	1.26e-05	99.0028	2.8216	0.0171166	65.5676	0.384644
37109-25	456PRA	16b	6	5.29041e-15	0.670782	0.0011151	0.235052	0.0002849	0.0027883	3.98e-05	0.0001332	9.56033e-06	2.28e-05	1.23e-05	99.0033	2.82213	0.0170693	65.5797	0.38358
37109-26	456PRA	16b	6	7.67632e-15	0.973287	0.0014666	0.341952	0.000381	0.0041126	4.46e-05	0.0001828	9.62133e-06	1.31e-05	1.29e-05	99.6162	2.83214	0.0128882	65.8081	0.289585
37109-27	456PRA	16b	6	9.00502e-15	1.14175	0.001543	0.400674	0.0004102	0.0048687	4.27e-05	0.000202	9.62133e-06	2.97e-05	1.28e-05	99.2397	2.82472	0.0112088	65.6389	0.251874
37109-28	456PRA	16b	6	9.04141e-15	1.1464	0.001543	0.402231	0.0004493	0.0048345	4.75e-05	0.0002113	9.38137e-06	2e-05	1.27e-05	99.4965	2.83254	0.011205	65.8173	0.251764
37109-29	456PRA	16b	6	4.76751e-15	0.604497	0.0010913	0.211204	0.0002107	0.0024294	2e-05	8.38e-05	8.93588e-06	2.38e-05	1.23e-05	98.8368	2.82565	0.0186428	65.6601	0.41892
37109-30	456PRA	16b	6	1.08012e-14	1.36957	0.001622	0.482217	0.0005082	0.0057976	4.46e-05	0.000144	9.68298e-06	1.21e-05	1.24e-05	99.7465	2.82975	0.0094756	65.7536	0.212915
37109-32	456PRA	16b	6	7.20945e-15	0.914154	0.0014666	0.319683	0.000352	0.0037934	2.77e-05	0.0001069	8.83233e-06	3.37e-05	1.27e-05	98.9096	2.82518	0.0135348	65.6494	0.304141
37109-33	456PRA	16b	6	1.15526e-14	1.46486	0.001622	0.513345	0.0004984	0.0062182	5.24e-05	0.000249	9.32309e-06	2.55e-05	1.32e-05	99.497	2.83598	0.0093408	65.8959	0.20987
37109-34	456PRA	16b	6	6.47857e-15	0.821387	0.0014666	0.286058	0.0003907	0.0034169	3.42e-05	0.000106	9.38137e-06	3.32e-05	1.29e-05	98.8051	2.83387	0.0153212	65.8477	0.344245
37109-35	456PRA	16b	6	1.11657e-14	1.41563	0.0017032	0.497011	0.0004591	0.0058943	5.34e-05	0.0002937	1e-05	8.8e-07	1.33e-05	100.001	2.8451	0.0096269	66.1038	0.216272
37109-36	456PRA	16b	6	9.95604e-15	1.26196	0.0013718	0.443128	0.0004591	0.0053828	3.89e-05	0.0002441	9.5e-06	1.61e-05	1.29e-05	99.6373	2.83431	0.0102401	65.8577	0.230079
37109-37	456PRA	16b	6	1.20389e-14	1.52551	0.001622	0.535837	0.0004689	0.0062861	2.95e-05	0.0003211	9.74525e-06	1.81e-05	1.31e-05	99.6645	2.8342	0.0089072	65.8551	0.200132
37109-38	456PRA	16b	6	5.61824e-15	0.711898	0.0013932	0.249094	0.0003039	0.0029566	2.59e-05	0.0001209	8.98888e-06	5.21e-06	1.26e-05	99.7975	2.84892	0.0168099	66.191	0.377623
37109-39	456PRA	16b	6	6.62885e-15	0.84004	0.0014666	0.293035	0.0003423	0.0033824	2.68e-05	0.0001401	9.1526e-06	4.1e-06	1.24e-05	99.8693	2.8597	0.0144024	66.4369	0.323499
37109-40	456PRA	16b	6	5.83667e-15	0.739656	0.0013369	0.259295	0.000266	0.0031446	3.61e-05	0.0001421	9.04268e-06	2.27e-05	1.25e-05	99.1027	2.82375	0.0159511	65.6167	0.358444
37109-41	456PRA	16b	6	4.52849e-15	0.57385	0.0010867	0.200089	0.0002017	0.0023367	2.08e-05	9.19e-05	8.7818e-06	1.29e-05	1.24e-05	99.3419	2.84587	0.0198641	66.1213	0.446252
37109-44	456PRA	16b	6	1.10656e-14	1.40229	0.0017032	0.493366	0.0004787	0.0057518	2.95e-05	0.0001289	9.5e-06	2.03e-05	1.31e-05	99.5768	2.82703	0.0096644	65.6917	0.217163
37109-45	456PRA	18c	6	1.45105e-14	1.83897	0.00146	0.643566	0.0005539	0.0076822	5.53e-05	0.0001	9.3723e-06	2.64e-05	1.07e-05	99.5823	2.84158	0.006427	66.0236	0.144391
37109-46	456PRA	18c	6	4.70383e-15	0.596113	0.0011268	0.207982	0.0002106	0.0025277	3.05e-05	4.19e-05	7.26705e-06	1.18e-05	9.68969e-06	99.424	2.84571	0.0154567	66.1178	0.34724
37109-47	456PRA	18c	6	1.17804e-14	1.49289	0.00146	0.511012	0.0004647	0.006216	5.43e-05	0.0001443	7.68375e-06	9.26e-05	1.11e-05	98.1663	2.8639	0.0079587	66.5328	0.178754
37109-48	456PRA	18c	6	4.12598e-15	0.522874	0.00104	0.182452	0.0002106	0.0022059	3.05e-05	4.25e-05	7.2111e-06	2.19e-05	9.5462e-06	98.7653	2.82651	0.0171893	65.6797	0.386255
37109-49	456PRA	18c	6	1.31693e-14	1.66869	0.00146	0.58565	0.000435	0.0069316	4.56e-05	8.42e-05	7.5e-06	4.63e-05	1.03e-05	99.1804	2.82201	0.0066214	65.5769	0.148795
37109-51	456PRA	18c	6	1.00589e-14	1.27463	0.0015367	0.447307	0.0004252	0.0053891	5.24e-05	0.0001693	7.56042e-06	3.65e-05	9.90858e-06	99.1712	2.82202	0.0083169	65.5773	0.186898
37109-52	456PRA	18c	6	8.05699e-15	1.02089	0.0013576	0.356272	0.0003955	0.004152	2.51e-05	9.12e-05	7.44043e-06	2.22e-05	9.68969e-06	99.3672	2.84339	0.0098615	66.0649	0.221549
37109-01	456PRA	16b	6	5.45597e-16	0.0691448	0.001061	0.0038036	0.0001101	6.12e-05	1.7e-05	6.51871e-06	8.20792e-06	0.0001216	1.26e-05	47.4828	8.62423	1.06461	193.367	22.3113
37109-02	456PRA	16b	6	2.74486e-15	0.348	0.0011789	0.120832	0.0001841	0.0014919	2.68e-05	7e-05	9.09725e-06	-6.78e-06	1.26e-05	100.601	2.89411	0.0332295	67.2216	0.746062
37109-06	456PRA	16b	6	3.38589e-15	0.42932	0.0012832	0.0005815	0.0001101	1.39e-05	1.77e-05	2.39e-05	8.24621e-06	7.32e-05	1.29e-05	94.9172	700.408	137.148	4193.08	318.082
37109-11	456PRA	16b	6	5.98973e-15	0.759465	0.0013647	0.0004694	0.0001074	3.67697e-06	1.7e-05	1.13e-05	8.49706e-06	6.7e-05	1.26e-05	97.3685	1574.37	371.978	5555.95	406.262
37109-12	456PRA	16b	6	1.08936e-14	1.38117	0.0019573	0.442587	0.0004885	0.0052132	3.42e-05	7.89e-05	8.7818e-06	6.87e-05	1.33e-05	98.5204	3.07112	0.0112	71.2532	0.250908
37109-15	456PRA	16b	6	2.06034e-16	0.0261256	0.0010312	0.0006618	0.0001063	-6.33257e-06	1.7e-05	2.11e-05	8.32586e-06	7.76e-05	1.22e-05	11.4195	4.50517	5.78901	103.587	127.419
37109-16	456PRA	16b	6	9.88961e-17	0.0016265	0.0010017	0.0002021	0.0001024	3.37056e-06	1.35e-05	3.44e-05	8.3672e-06	-1.27e-05	1.22e-05	334.922	26.9617	23.4883	546.458	405.807
37109-22	456PRA	16b	6	1.99551e-16	0.0253014	0.0010246	0.0006965	0.0001053	6.74112e-06	1.92e-05	3.53e-05	8.73213e-06	6.98e-05	1.24e-05	17.7352	6.4396	5.61494	146.306	120.738
37109-24	456PRA	16b	6	1.72112e-14	2.18149	0.0020447	0.721804	0.0006168	0.0086452	5.82e-05	0.000152	9.56033e-06	8.18e-05	1.39e-05	98.8862	2.98528	0.0077205	69.2991	0.173144
37109-42	456PRA	16b	6	2.87253e-15	0.364018	0.0012573	0.0004084	0.0001096	5.12e-05	1.77e-05	1.83e-05	8.45281e-06	0.000141	1.26e-05	88.4373	787.916	218.51	4386.07	455.535
37109-43	456PRA	16b	6	2.06064e-18	-0.0011007	0.0009992	-8.67119e-06	0.0001034	0	1.39e-05	-1.06e-05	8.32586e-06	5.09999e-07	1.21e-05	114.757	147.03	1879.83	1940.16	15106.9
Weighted Mean																2.83509	0.00171492	65.8757	0.0498179
Sample PH13-2			J = 0.013205 ± 3.01656E-06
37006-01	443PRA	12b	6	8.08964e-15	1.02465	0.0009365	0.365908	0.0003757	0.0044516	4.49e-05	8.94e-05	1.35e-05	2.59e-05	1.3e-05	99.2599	2.77594	0.0117002	65.0897	0.269269
37006-02	443PRA	12b	6	1.07928e-14	1.3671	0.0011049	0.479875	0.0005141	0.0058188	4.88e-05	6.45e-05	1.7e-05	5.69e-05	1.32e-05	98.7656	2.81003	0.0096031	65.8748	0.220911
37006-03	443PRA	12b	6	5.20633e-15	0.65943	0.0008766	0.232508	0.0002486	0.0028122	3.83e-05	2.13e-05	1.63e-05	2.54e-05	1.3e-05	98.8537	2.79999	0.0176652	65.6435	0.406422
37006-04	443PRA	12b	6	4.96968e-15	0.629475	0.0008184	0.223694	0.0002486	0.0027478	3.64e-05	3.64e-05	1.31e-05	-9.82e-06	1.26e-05	100.476	2.82368	0.0177794	66.1891	0.408926
37006-05	443PRA	12b	6	4.37441e-15	0.554084	0.0006107	0.19506	0.0002008	0.0022968	2.64e-05	3.65e-05	1.34e-05	1.06e-05	1.22e-05	99.4405	2.821	0.0194762	66.1273	0.447969
37006-06	443PRA	12b	6	8.62504e-15	1.09258	0.0009538	0.384003	0.000425	0.0047072	4.11e-05	6.74e-05	1.78e-05	1.41e-05	1.24e-05	99.6249	2.83087	0.0109294	66.3546	0.251354
37006-07	443PRA	12b	6	5.08616e-15	0.644215	0.0008682	0.226218	0.000268	0.0028151	3.45e-05	6.83e-05	1.43e-05	4.17e-05	1.29e-05	98.0827	2.78951	0.0180305	65.4023	0.414882
37006-08	443PRA	12b	6	4.21621e-15	0.534046	0.0006862	0.189753	0.0002008	0.0022212	2.22e-05	5.63e-05	1.29e-05	3e-05	1.22e-05	98.3357	2.76396	0.0199953	64.814	0.460243
37006-09	443PRA	12b	6	5.11624e-15	0.648041	0.0008431	0.229258	0.0002486	0.0027476	2.64e-05	7.31e-05	1.25e-05	1.7e-05	1.25e-05	99.2331	2.80134	0.0172502	65.6748	0.396869
37006-10	443PRA	12b	6	5.23498e-15	0.663149	0.0008431	0.233501	0.0002777	0.0028611	3.92e-05	4.95e-05	1.63e-05	6.25e-06	1.25e-05	99.7309	2.82867	0.0170178	66.3039	0.391386
37006-11	443PRA	12b	6	3.64516e-15	0.461817	0.0006107	0.163344	0.0001914	0.0020195	3e-05	4.25e-05	1.41e-05	2.17e-05	1.22e-05	98.6095	2.78431	0.0231498	65.2825	0.532713
37006-12	443PRA	12b	6	7.63823e-15	0.967513	0.0009365	0.341735	0.000356	0.0040633	3.18e-05	0.0001186	1.35e-05	2.8e-05	1.25e-05	99.1554	2.80359	0.0121021	65.7266	0.27842
37006-13	443PRA	12b	6	5.10168e-15	0.646159	0.0008936	0.226236	0.000268	0.0026854	2.64e-05	0.0001067	1.63e-05	5.98e-05	1.3e-05	97.2601	2.77424	0.0182259	65.0507	0.41946
37006-14	443PRA	12b	6	6.46782e-15	0.819305	0.0008102	0.290052	0.0003363	0.0034086	2.64e-05	2.29e-05	1.63e-05	2.84e-06	1.27e-05	99.9004	2.81815	0.0141471	66.0618	0.325406
37006-15	443PRA	12b	6	4.71766e-15	0.597661	0.0008021	0.20244	0.0002103	0.0024571	3.09e-05	4.03e-05	1.34e-05	0.0001225	1.26e-05	93.8878	2.76823	0.0196035	64.9123	0.451199
37006-16	443PRA	12b	6	3.89203e-15	0.493029	0.0006303	0.175599	0.0002008	0.0020898	2.64e-05	3.22e-05	1.31e-05	1.07e-05	1.21e-05	99.3626	2.78613	0.0213104	65.3246	0.490375
37006-17	443PRA	12b	6	2.4232e-15	0.306981	0.0006862	0.108092	0.0001635	0.0012775	2.14e-05	3.64263e-06	1.63e-05	2.2e-05	1.21e-05	97.8613	2.7756	0.0345323	65.0819	0.794732
37006-18	443PRA	12b	6	4.02937e-15	0.510416	0.000637	0.17368	0.0001914	0.0020532	2.22e-05	2.08e-05	1.56e-05	6.43e-05	1.25e-05	96.2456	2.8248	0.0223782	66.2148	0.514692
37006-19	443PRA	12b	6	4.21927e-15	0.534385	0.0006576	0.188986	0.0002103	0.0021971	2.3e-05	3.56e-05	1.4e-05	2.6e-05	1.27e-05	98.5588	2.78322	0.0208014	65.2576	0.478679
37006-20	443PRA	12b	6	4.85836e-15	0.615383	0.0006576	0.216967	0.0002294	0.0025648	2.39e-05	4.98e-05	1.63e-05	2.21e-05	1.25e-05	98.9413	2.80259	0.01806	65.7034	0.415492
37006-22	443PRA	12b	6	5.11874e-15	0.64845	0.0008766	0.228634	0.0002583	0.002678	2.56e-05	1.83e-05	1.7e-05	7.61e-06	1.27e-05	99.6534	2.82264	0.01758	66.165	0.404347
37006-23	443PRA	12b	6	4.94961e-15	0.627	0.0008682	0.221512	0.0002294	0.0027068	3.92e-05	3.75e-05	1.31e-05	4.57e-05	1.25e-05	97.8315	2.76552	0.0178334	64.8498	0.410474
37006-24	443PRA	12b	6	3.79941e-15	0.481312	0.000778	0.171229	0.000182	0.0020519	2.22e-05	3.52e-05	1.3e-05	1.16e-05	1.22e-05	99.295	2.78743	0.0222659	65.3544	0.512354
37006-25	443PRA	12b	6	4.20374e-15	0.532434	0.0006438	0.185441	0.0001914	0.0022085	3.18e-05	4.53e-05	1.38e-05	2.91e-05	1.25e-05	98.3828	2.82103	0.0209567	66.128	0.48202
37006-27	443PRA	12b	6	6.02236e-15	0.762873	0.0008851	0.270702	0.0002972	0.0031975	2.47e-05	4.2e-05	1.63e-05	2.11e-05	1.25e-05	99.1808	2.79135	0.0148342	65.4446	0.341327
37006-28	443PRA	12b	6	2.46073e-15	0.311665	0.0006647	0.109443	0.0001635	0.0012889	1.98e-05	2.87e-05	1.29e-05	1.47e-05	1.23e-05	98.6046	2.80429	0.034535	65.7427	0.794503
37006-29	443PRA	12b	6	4.25192e-15	0.538597	0.0006507	0.189279	0.0001914	0.0022879	3.27e-05	5.58e-05	1.3e-05	2.45e-05	1.2e-05	98.6561	2.80358	0.0196476	65.7262	0.452012
37006-30	443PRA	12b	6	3.94449e-15	0.499574	0.0006237	0.176394	0.0001914	0.0019987	3.36e-05	3.95e-05	1.34e-05	1.87e-05	1.21e-05	98.896	2.79718	0.0212909	65.5789	0.489856
37006-31	443PRA	12b	6	3.98269e-15	0.504431	0.0008021	0.181677	0.000182	0.0021585	2.39e-05	3.93e-05	1.34e-05	-2.7e-06	1.21e-05	100.172	2.77761	0.0207493	65.1283	0.477515
37006-32	443PRA	12b	6	5.45965e-15	0.691545	0.0008184	0.243582	0.0002874	0.0030425	3.45e-05	5.71e-05	1.3e-05	3.89e-05	1.25e-05	98.3339	2.78808	0.0164194	65.3694	0.377818
37006-33	443PRA	12b	6	5.10682e-15	0.646905	0.000786	0.228839	0.000268	0.0027602	3.45e-05	4.45e-05	1.31e-05	2.74e-05	1.3e-05	98.745	2.78773	0.0178935	65.3613	0.41174
37006-34	443PRA	12b	6	4.74158e-15	0.6006	0.0008266	0.211941	0.0002198	0.0024569	2.56e-05	4.53e-05	1.35e-05	2.54e-05	1.28e-05	98.7461	2.79457	0.0189532	65.5189	0.436085
37006-35	443PRA	12b	6	5.54655e-15	0.702514	0.0009021	0.249375	0.0002777	0.0029168	2.64e-05	5.96e-05	1.7e-05	2.22e-05	1.24e-05	99.0708	2.78722	0.015955	65.3497	0.367136
37006-36	443PRA	12b	6	5.64798e-15	0.71541	0.0008431	0.250358	0.000268	0.0029997	2.47e-05	4.41e-05	1.33e-05	3.41e-05	1.27e-05	98.5873	2.81346	0.0161117	65.9538	0.370618
37006-37	443PRA	12b	6	5.76446e-15	0.730082	0.0008598	0.257499	0.0002874	0.0030932	3.83e-05	4.43e-05	1.33e-05	3.39e-05	1.26e-05	98.6212	2.79248	0.0156633	65.4707	0.360401
37006-38	443PRA	12b	6	5.16639e-15	0.654421	0.0008431	0.226002	0.0002777	0.0026889	2.56e-05	0.0001009	1.32e-05	7.59e-05	1.23e-05	96.5618	2.79241	0.0173958	65.4691	0.400263
37006-39	443PRA	12b	6	2.4351e-15	0.308449	0.0007084	0.10859	0.0001635	0.0012996	2.06e-05	2.59e-05	1.3e-05	3.43e-05	1.21e-05	96.6964	2.74303	0.0342676	64.3317	0.788966
37006-40	443PRA	12b	6	4.88008e-15	0.618182	0.0007622	0.218171	0.000239	0.0025399	2.3e-05	3.15e-05	1.36e-05	9.79e-06	1.25e-05	99.5344	2.81654	0.0180732	66.0247	0.415722
37006-41	443PRA	13	6	3.73239e-15	0.47298	0.0009643	0.166443	0.0001824	0.0020135	2.16e-05	3.09e-05	1.18e-05	3.91e-05	1.27e-05	97.5489	2.76802	0.0239193	64.9075	0.550535
37006-42	443PRA	13	6	5.55106e-15	0.703405	0.001061	0.246422	0.0002779	0.0029023	2.33e-05	2.98e-05	1.19e-05	3.16e-05	1.26e-05	98.6662	2.81233	0.0165258	65.9278	0.380149
37006-43	443PRA	13	6	5.70737e-15	0.723241	0.001061	0.252343	0.0002974	0.0030154	2.51e-05	9.69867e-06	1.49e-05	5.76e-05	1.26e-05	97.6263	2.79403	0.016145	65.5063	0.371475
37006-44	443PRA	13	6	3.77207e-15	0.477976	0.0009774	0.169366	0.0001824	0.0019301	3.23e-05	1.84e-05	1.19e-05	1.46e-05	1.25e-05	99.0949	2.79255	0.023214	65.4724	0.534134
37006-45	443PRA	13	6	4.46792e-15	0.566222	0.0009386	0.197671	0.0002201	0.002366	2.25e-05	4.11e-05	1.24e-05	5.15e-05	1.29e-05	97.3008	2.78312	0.0205285	65.2551	0.4724
37006-46	443PRA	13	6	5.02131e-15	0.63636	0.0010253	0.223728	0.0002297	0.0027415	3.51e-05	6.03e-05	1.25e-05	7.52e-05	1.29e-05	96.4919	2.7406	0.0183173	64.2757	0.421745
37006-47	443PRA	13	6	4.47985e-15	0.567748	0.0008628	0.199933	0.0002201	0.0024078	2.42e-05	3.85e-05	1.23e-05	4.04e-05	1.24e-05	97.8928	2.77582	0.0195898	65.0871	0.45084
37006-48	443PRA	13	6	5.06636e-15	0.642078	0.0010538	0.224986	0.0002201	0.0028437	3.7e-05	3.55e-05	1.14e-05	3.22e-05	1.26e-05	98.5152	2.80742	0.0178347	65.8146	0.410284
37006-49	443PRA	13	6	6.32662e-15	0.801792	0.0010395	0.285039	0.0003365	0.0035051	4.18e-05	2.52e-05	1.41e-05	3.34e-05	1.29e-05	98.7657	2.77416	0.01475	65.0489	0.339465
37006-50	443PRA	13	6	4.35575e-15	0.55202	0.0009386	0.195703	0.0002106	0.002308	2.16e-05	2.58e-05	1.24e-05	5.34e-05	1.24e-05	97.1202	2.7355	0.0199931	64.1582	0.460358
37006-51	443PRA	13	6	7.21623e-15	0.914714	0.0011357	0.324013	0.0003562	0.0038406	2.59e-05	4.27e-05	1.23e-05	3.63e-05	1.25e-05	98.8263	2.78589	0.0128193	65.319	0.294986
37006-52	443PRA	13	6	6.93315e-15	0.878783	0.0010114	0.31043	0.0003562	0.003672	2.42e-05	7.95e-05	1.56e-05	3.29e-05	1.28e-05	98.9006	2.79567	0.013509	65.5442	0.310818
37006-53	443PRA	13	6	4.79535e-15	0.607726	0.0008472	0.21488	0.0002393	0.0025294	2.33e-05	1.52e-05	1.19e-05	1.02e-05	1.26e-05	99.505	2.81012	0.0184267	65.8768	0.423888
37006-54	443PRA	13	6	5.22953e-15	0.662602	0.0010045	0.231416	0.0002393	0.0028362	3.42e-05	4.71e-05	1.2e-05	4.24e-05	1.28e-05	98.1067	2.80497	0.017637	65.7582	0.405748
37006-55	443PRA	13	6	5.46839e-15	0.692927	0.0008472	0.24562	0.0003267	0.0029575	3.23e-05	5.46e-05	1.18e-05	4.05e-05	1.27e-05	98.2738	2.7684	0.0165349	64.9163	0.380571
37006-58	443PRA	13	6	4.76157e-15	0.603472	0.0008472	0.211594	0.0002297	0.002447	3.51e-05	4.66224e-06	1.41e-05	1.25e-05	1.23e-05	99.3801	2.83022	0.0183753	66.3396	0.422598
37006-59	443PRA	13	6	4.66633e-15	0.591433	0.0009774	0.205217	0.0002201	0.0025472	3.61e-05	2.11e-05	1.19e-05	5.37e-05	1.25e-05	97.2976	2.80004	0.019341	65.6447	0.444978
37006-60	443PRA	14b	6	6.71476e-15	0.850707	0.00118	0.298042	0.000324	0.0036379	3.63e-05	5.74e-05	1.22e-05	3.9e-05	1.33e-05	98.6496	2.81149	0.0143788	65.9085	0.330764
37006-61	443PRA	14b	6	7.99161e-15	1.01253	0.0011236	0.356545	0.0004032	0.0042012	2.69e-05	2.99e-05	1.27e-05	1.5e-05	1.33e-05	99.5642	2.82315	0.012171	66.1767	0.279936
37006-62	443PRA	14b	6	6.66433e-15	0.844318	0.0011741	0.293725	0.0004032	0.003605	3.54e-05	3.38e-05	1.23e-05	7.3e-05	1.38e-05	97.4313	2.79641	0.0153195	65.5613	0.35247
37006-63	443PRA	14b	6	5.44278e-15	0.689601	0.0011511	0.244221	0.0002748	0.0028917	2.59e-05	4.75e-05	1.23e-05	3.22e-05	1.34e-05	98.6259	2.78063	0.0174617	65.1979	0.40184
37006-65	443PRA	14b	6	4.11539e-15	0.521428	0.0010308	0.183603	0.0001871	0.0022305	2.78e-05	9.46268e-06	1.23e-05	8.58e-06	1.35e-05	99.5144	2.82187	0.0229461	66.1473	0.527773
37006-66	443PRA	14b	6	7.92002e-15	1.00345	0.001255	0.360288	0.0003933	0.0042801	2.69e-05	2.97e-05	1.41e-05	3.11e-05	1.33e-05	99.0835	2.75537	0.0121137	64.6161	0.278859
37006-67	443PRA	14b	6	5.45239e-15	0.690798	0.0010599	0.245527	0.000265	0.0028314	2.32e-05	2.95e-05	1.24e-05	2.37e-05	1.3e-05	98.9849	2.78071	0.0168	65.1998	0.386613
37006-69	443PRA	14b	6	4.75042e-15	0.602029	0.0011344	0.215097	0.0002064	0.0026257	3.35e-05	3.85e-05	1.24e-05	4.94e-05	1.29e-05	97.5679	2.72662	0.0190516	63.9536	0.43873
37006-70	443PRA	14b	6	8.59405e-15	1.08926	0.0012292	0.376487	0.0003933	0.0044899	2.97e-05	5.34e-05	1.24e-05	9.84e-05	1.38e-05	97.3146	2.81123	0.012001	65.9023	0.276068
37006-71	443PRA	14b	6	4.00628e-15	0.507785	0.0011079	0.179703	0.0001871	0.0021379	1.88e-05	1.86e-05	1.38e-05	2.46e-05	1.3e-05	98.5623	2.7808	0.0228556	65.2018	0.525966
37006-72	443PRA	14b	6	4.17555e-15	0.529188	0.0010347	0.187603	0.0002161	0.0022481	2.23e-05	2.61e-05	1.26e-05	5.71e-06	1.33e-05	99.692	2.80779	0.022181	65.8233	0.510268
37006-73	443PRA	14b	6	2.30319e-15	0.29198	0.0010599	0.102963	0.0001584	0.0012199	2.05e-05	8.67328e-06	1.21e-05	2.22e-05	1.3e-05	97.7426	2.76751	0.0394192	64.8956	0.907292
37006-74	443PRA	14b	6	2.61965e-15	0.332094	0.0010689	0.11598	0.000149	0.0013826	2.05e-05	3.46122e-06	1.24e-05	1.14e-05	1.33e-05	98.9787	2.8298	0.0356782	66.3298	0.820536
37006-75	443PRA	14b	6	5.30744e-15	0.672717	0.001192	0.227101	0.0002551	0.0027054	2.5e-05	4.2405e-06	1.24e-05	0.0001283	1.35e-05	94.3077	2.78933	0.0189514	65.3981	0.436074
37006-76	443PRA	14b	6	3.41247e-15	0.432428	0.0011455	0.151863	0.0001679	0.0018119	2.78e-05	-7.42846e-06	1.46e-05	3.91e-05	1.31e-05	97.2975	2.76628	0.0271532	64.8674	0.624981
37006-77	443PRA	14b	6	5.40968e-15	0.685666	0.0011236	0.239345	0.0002551	0.0028396	2.32e-05	3.35e-05	1.23e-05	3.46e-05	1.33e-05	98.5085	2.81772	0.0176161	66.0518	0.405203
37006-78	443PRA	14b	6	4.03513e-15	0.511499	0.0010347	0.18115	0.0001775	0.0021885	1.96e-05	1.01e-05	1.25e-05	2.48e-05	1.31e-05	98.5564	2.77859	0.022708	65.1508	0.522584
37006-79	443PRA	14b	6	5.18764e-15	0.657462	0.0011625	0.231742	0.0002161	0.0028068	3.06e-05	7.23e-05	1.49e-05	1.92e-05	1.29e-05	99.1614	2.80895	0.0177577	65.8499	0.408505
Weighted Mean																2.79552	0.00202133	65.5409	0.0483799
J = 0.013011 ± 5.25799E-06			29
37132-04	456PRC	20	6	4.25214e-15	0.539098	0.0009633	0.187411	0.000209	0.0022673	3.38e-05	0.000134	9.84733e-06	3.7e-05	1.33e-05	97.9609	2.8156	0.0224043	65.0491	0.506895
37132-06	456PRC	20	6	4.20016e-15	0.532489	0.0009372	0.185592	0.0001999	0.0021972	2.11e-05	0.0001429	9.67988e-06	3.45e-05	1.3e-05	98.0773	2.81165	0.022224	64.9597	0.50284
37132-07	456PRC	20	6	5.26745e-15	0.667815	0.0010112	0.232553	0.0002553	0.0027536	3.48e-05	0.0001811	9.67988e-06	2.4e-05	1.34e-05	98.9364	2.83879	0.0184764	65.5754	0.417904
37132-08	456PRC	20	6	4.35145e-15	0.551692	0.0008286	0.191813	0.0002181	0.0023677	2.73e-05	0.0001635	9.84733e-06	3.9e-05	1.31e-05	97.9007	2.81351	0.0215226	65.0018	0.486958
37132-09	456PRC	20	6	5.58282e-15	0.707843	0.0009437	0.246478	0.0002742	0.0030273	3.01e-05	0.0001809	9.90454e-06	2.31e-05	1.3e-05	99.034	2.84175	0.0170824	65.6425	0.38636
37132-11	456PRC	20	6	7.30346e-15	0.925888	0.0010182	0.323099	0.0003704	0.0037688	2.28e-05	0.0002004	9.96243e-06	3.17e-05	1.32e-05	98.9861	2.83425	0.0136651	65.4725	0.3091
37132-12	456PRC	20	6	4.2585e-15	0.539912	0.0008188	0.185635	0.000209	0.0022303	2.02e-05	0.0001043	1e-05	4.79e-05	1.34e-05	97.3611	2.82939	0.022714	65.3621	0.513814
37132-14	456PRC	20	6	4.80912e-15	0.609716	0.0008237	0.213782	0.0002366	0.0025728	3.01e-05	0.0001662	9.96243e-06	2.01e-05	1.31e-05	99.0241	2.82187	0.0194709	65.1916	0.440492
37132-16	456PRC	20	6	4.71883e-15	0.598252	0.0009972	0.209885	0.0002273	0.002484	3.2e-05	0.0001213	9.84733e-06	1.86e-05	1.33e-05	99.082	2.82188	0.0201381	65.1917	0.455585
37132-18	456PRC	20	6	3.30352e-15	0.41883	0.0008237	0.146349	0.0001999	0.0017675	1.94e-05	0.0001292	1.01e-05	2.43e-05	1.34e-05	98.2771	2.81022	0.0285717	64.9272	0.646474
37132-20	456PRC	20	6	4.76714e-15	0.6044	0.0009835	0.210929	0.0002366	0.0026131	3.29e-05	0.0001422	1.01e-05	3.26e-05	1.34e-05	98.4009	2.81726	0.0202899	65.0868	0.459047
37132-21	456PRC	19b	6	4.88636e-15	0.619451	0.0011715	0.217366	0.0002647	0.0026514	3.35e-05	0.0001103	8.78635e-06	9.11e-06	1.38e-05	99.572	2.83485	0.0201965	65.4861	0.456833
37132-24	456PRC	19b	6	4.48385e-15	0.5684	0.0010986	0.197598	0.000209	0.0023069	1.96e-05	0.000113	8.40238e-06	2.63e-05	1.35e-05	98.6276	2.83431	0.0215416	65.4738	0.487262
37132-25	456PRC	19b	6	3.41454e-15	0.432831	0.0012175	0.149598	0.0001999	0.001769	1.96e-05	6.4e-05	8.2201e-06	4.16e-05	1.32e-05	97.1384	2.80777	0.0280586	64.8715	0.634884
37132-28	456PRC	19b	6	4.08436e-15	0.517657	0.0009932	0.179182	0.0002181	0.0021073	1.88e-05	9.32e-05	8.5276e-06	1.42e-05	1.29e-05	99.1928	2.86287	0.0227194	66.1217	0.513719
37132-29	456PRC	19b	6	3.16653e-15	0.401355	0.0009657	0.140727	0.0002273	0.0016964	1.88e-05	6.5e-05	8.16088e-06	1.15e-05	1.31e-05	99.1524	2.82506	0.0291532	65.2639	0.659509
37132-30	456PRC	19b	6	3.36815e-15	0.426967	0.0009586	0.149421	0.0001821	0.0017999	2.87e-05	6.5e-05	7.93221e-06	2.24e-05	1.32e-05	98.4415	2.81018	0.0275398	64.9263	0.623127
37132-31	456PRC	19b	6	4.41479e-15	0.559667	0.0010707	0.194904	0.0001999	0.0022495	2.23e-05	9.56e-05	7.82304e-06	2.72e-05	1.3e-05	98.5601	2.82738	0.0211286	65.3166	0.477962
37132-32	456PRC	19b	6	4.44455e-15	0.563315	0.0010817	0.195422	0.0001999	0.002366	2.59e-05	8.33e-05	8.34086e-06	2.17e-05	1.3e-05	98.8576	2.84682	0.0210139	65.7576	0.47525
37132-34	456PRC	19b	6	5.06063e-15	0.641327	0.0011526	0.223286	0.0002459	0.0026062	3.63e-05	0.0001039	8.16088e-06	2.88e-05	1.33e-05	98.6676	2.83116	0.0190274	65.4023	0.430407
37132-35	456PRC	19b	6	5.96942e-15	0.75633	0.0013379	0.263155	0.000322	0.0030902	2.32e-05	0.0001418	8.5276e-06	1.91e-05	1.33e-05	99.2557	2.84989	0.0165818	65.8271	0.374999
37132-36	456PRC	19b	6	7.04708e-15	0.892739	0.0012175	0.308451	0.0003704	0.0037003	3.92e-05	0.0001335	8.72067e-06	6.09e-05	1.37e-05	97.9723	2.83279	0.0145589	65.4393	0.329323
37132-37	456PRC	19b	6	2.95848e-15	0.374693	0.0012108	0.128816	0.0001734	0.0014999	1.71e-05	5.96e-05	7.93221e-06	2.2e-05	1.35e-05	98.2576	2.85526	0.0332025	65.949	0.750828
37132-38	456PRC	19b	6	4.7563e-15	0.602739	0.0010153	0.209861	0.0002181	0.0024879	2.32e-05	9.26e-05	8.04487e-06	2.42e-05	1.32e-05	98.8085	2.83507	0.0198281	65.491	0.448498
37132-40	456PRC	19b	6	3.70609e-15	0.46961	0.0009809	0.162248	0.0001821	0.0019188	2.59e-05	9.5e-05	7.98812e-06	7.61e-06	1.33e-05	99.5287	2.87791	0.0256179	66.4628	0.579149
37132-42	456PRC	19b	6	2.6694e-15	0.338341	0.0010345	0.117157	0.0001734	0.0014321	2.78e-05	4.65e-05	7.98812e-06	1.22e-05	1.34e-05	98.9351	2.85435	0.0356292	65.9285	0.805714
37132-44	456PRC	19b	6	4.90573e-15	0.62177	0.0011526	0.213985	0.0002181	0.0025281	2.23e-05	0.0001162	1.08e-05	5.99e-05	1.33e-05	97.1336	2.8196	0.0197958	65.1399	0.447856
37132-46	456PRC	16b	6	1.07917e-14	1.36721	0.0013438	0.47528	0.0004395	0.0056312	3.23e-05	0.0002872	1.03e-05	2.8e-05	1.31e-05	99.4087	2.85637	0.0096487	65.9743	0.216785
37132-49	456PRC	16b	6	1.11253e-14	1.40956	0.0013932	0.488201	0.0004689	0.0058714	5.14e-05	0.0002668	9.80816e-06	3.61e-05	1.31e-05	99.2533	2.86242	0.009548	66.1113	0.214505
37132-55	456PRC	18a	6	4.31053e-15	0.545626	0.0008801	0.188979	0.0001922	0.0022529	1.94e-05	2.24e-05	8.91572e-06	1.67e-05	1.12e-05	99.0943	2.85682	0.0187791	65.9844	0.42192
37132-01	456PRC	20	6	4.29543e-15	0.544498	0.0008286	0.170494	0.0001999	0.0021038	1.94e-05	0.0001676	9.67988e-06	0.0001962	1.39e-05	89.2496	2.84806	0.0257353	65.7856	0.582021
37132-02	456PRC	20	6	4.09524e-15	0.519152	0.000906	0.172029	0.0001821	0.0020628	2.02e-05	0.0001542	9.57183e-06	0.0001187	1.34e-05	93.1848	2.80988	0.0246239	64.9195	0.557152
37132-03	456PRC	20	6	1.4582e-14	1.84868	0.0016639	0.311821	0.0003898	0.003771	3.38e-05	0.0002094	9.84733e-06	0.0001342	1.47e-05	97.8374	5.79646	0.0189447	131.458	0.413175
37132-05	456PRC	20	6	3.1542e-15	0.399887	0.0009246	0.139599	0.0001821	0.0015954	1.94e-05	0.0001034	9.79081e-06	3.66e-05	1.33e-05	97.2731	2.78414	0.0298212	64.3351	0.674967
37132-10	456PRC	20	6	5.17805e-15	0.656497	0.0009767	0.179483	0.000191	0.0021407	1.86e-05	0.0001358	9.67988e-06	3.84e-05	1.34e-05	98.2597	3.5913	0.0238557	82.5667	0.534531
37132-13	456PRC	20	6	4.18128e-15	0.530099	0.0008237	0.187307	0.000191	0.0021744	1.86e-05	0.0001135	9.46678e-06	2.78e-05	1.32e-05	98.4442	2.78377	0.0220926	64.3269	0.500043
37132-15	456PRC	20	6	2.95442e-15	0.374582	0.000894	0.11479	0.0001734	0.0013555	1.78e-05	6.69e-05	9.36483e-06	2.38e-05	1.34e-05	98.1096	3.19896	0.0364835	73.7277	0.821485
37132-17	456PRC	20	6	1.78424e-15	0.226222	0.0008491	0.0783881	0.0001564	0.0009245	1.78e-05	7.13e-05	9.31504e-06	2.9e-05	1.31e-05	96.1788	2.77336	0.0516061	64.0903	1.1682
37132-19	456PRC	20	6	5.0591e-15	0.641403	0.0009767	0.227335	0.0002366	0.002799	3.2e-05	0.0001803	9.67988e-06	3.1e-05	1.32e-05	98.569	2.77872	0.0185792	64.2121	0.420547
37132-22	456PRC	19b	6	2.86698e-16	0.036343	0.0009265	0.0064918	0.0001035	0.0001018	1.19e-05	0.0058068	4.15e-05	6.09e-05	1.26e-05	59.5094	3.34427	0.60242	77.0064	13.5399
37132-23	456PRC	19b	6	1.93945e-14	2.45839	0.0022847	0.43954	0.0004289	0.0053214	4.7e-05	0.0005214	1.04e-05	0.0003427	1.56e-05	95.8503	5.35649	0.0140502	121.808	0.308068
37132-26	456PRC	19b	6	1.65901e-15	0.210289	0.0010018	0.0751528	0.0001564	0.0008887	1.63e-05	3.05e-05	7.93221e-06	7.29e-06	1.31e-05	98.9733	2.76671	0.0543958	63.9394	1.23145
37132-33	456PRC	19b	6	1.24915e-15	0.158336	0.0010296	0.0570991	0.0001821	0.0006678	1.47e-05	2.61e-05	1.17e-05	1.34e-05	1.56e-05	97.4824	2.7005	0.0839456	62.4355	1.902
37132-39	456PRC	19b	6	2.02737e-15	0.256901	0.0011102	0.0891738	0.000209	0.0010787	2.41e-05	3.88e-05	7.66616e-06	4.26e-05	1.56e-05	95.0576	2.73581	0.0541229	63.2377	1.22575
37132-41	456PRC	19b	6	3.85349e-15	0.48841	0.0009809	0.172065	0.0001999	0.0020255	1.71e-05	7.75e-05	8.16088e-06	2.92e-05	1.3e-05	98.2261	2.78541	0.0237463	64.3639	0.53746
37132-43	456PRC	19b	6	4.75842e-15	0.603116	0.0010872	0.211383	0.0002459	0.0025182	2.97e-05	0.0001087	8.10247e-06	5.96e-05	1.34e-05	97.0627	2.76665	0.0200664	63.938	0.454279
37132-45	456PRC	16b	6	2.3838e-15	0.302013	0.0010959	0.102987	0.0001841	0.0012355	2.08e-05	4.88e-05	8.63539e-06	4.08e-05	1.2e-05	95.9824	2.81152	0.0371205	64.9566	0.834477
37132-48	456PRC	16b	6	6.46082e-16	0.0818519	0.0010183	0.0280723	0.0001038	0.0003342	1.51e-05	0.0055313	3.68e-05	2.85e-05	1.18e-05	96.2195	2.80701	0.131878	64.8543	2.96482
37132-50	456PRC	18a	6	4.32179e-15	0.547228	0.0008402	0.186228	0.0001725	0.0022348	1.85e-05	1.2e-05	8.95545e-06	8.47e-05	1.11e-05	95.3839	2.79868	0.0186969	64.6652	0.420377
37132-51	456PRC	18a	6	8.56455e-15	1.08422	0.0009541	0.362291	0.000401	0.0042827	3.67e-05	3.95e-05	9.0377e-06	6.68e-06	1.16e-05	99.825	2.98301	0.0107269	68.8442	0.240628
37132-52	456PRC	18a	6	2.81023e-15	0.3558	0.0006106	0.122471	0.0001528	0.0014888	1.58e-05	1.12e-05	8.99611e-06	3.75e-05	1.12e-05	96.8611	2.80979	0.0280635	64.9174	0.630888
37132-53	456PRC	18a	6	3.87522e-15	0.490615	0.000644	0.172891	0.0001725	0.002135	2.6e-05	5.31919e-06	8.83912e-06	2.83e-05	1.08e-05	98.279	2.78471	0.0194176	64.3481	0.436658
37132-54	456PRC	18a	6	3.27078e-15	0.414085	0.0006268	0.145448	0.0001626	0.0017928	2.7e-05	3.08e-05	8.95545e-06	1.54e-05	1.11e-05	98.9075	2.81168	0.0234545	64.9602	0.527261
37132-56	456PRC	18a	6	3.86761e-15	0.489554	0.0007284	0.170103	0.0001823	0.0019708	1.94e-05	3.67e-05	8.80227e-06	3.56e-05	1.09e-05	97.8483	2.81187	0.0199768	64.9645	0.44908
37132-57	456PRC	18a	6	3.98371e-15	0.504237	0.0007716	0.177777	0.0001823	0.0021474	2.8e-05	1.82e-05	8.83912e-06	1.19e-05	1.08e-05	99.3056	2.81244	0.0189839	64.9774	0.426757
Weighted Mean																2.8371	0.00321965	65.5373	0.0768669
Sample MD15-1			J = 0.013051 ± 4.27222E-06
37122-01	456PRB	17	6	8.74148e-15	1.10808	0.0018385	0.387681	0.0004588	0.0046779	3.79e-05	9.47e-05	8.2662e-06	5.19e-06	1.27e-05	99.8724	2.85096	0.0121808	66.2912	0.274959
37122-02	456PRB	17	6	9.34627e-15	1.18479	0.0017029	0.407153	0.0004776	0.0048853	4.27e-05	0.000212	9.00278e-06	8.16e-05	1.26e-05	97.9677	2.8472	0.0116427	66.2052	0.262823
37122-04	456PRB	17	6	7.44741e-15	0.943967	0.0016401	0.328554	0.0004031	0.0038236	2.86e-05	0.0001182	8.20975e-06	-5.7e-07	1.29e-05	100.035	2.87045	0.0139554	66.736	0.314941
37122-05	456PRB	17	6	2.05214e-15	0.260086	0.001449	0.0888248	0.0002193	0.0010773	1.92e-05	3.43e-05	7.88923e-06	2.47e-05	1.2e-05	97.1804	2.84192	0.0445208	66.0846	1.00509
37122-06	456PRB	17	6	3.46706e-15	0.439404	0.001516	0.152345	0.0002408	0.0017459	2.33e-05	4.78e-05	7.78974e-06	1.58e-05	1.23e-05	98.9408	2.8501	0.0270101	66.2715	0.609708
37122-07	456PRB	17	6	1.27495e-14	1.61552	0.0019849	0.563333	0.0004682	0.0068379	4.27e-05	0.0002387	8.80909e-06	2.04e-05	1.28e-05	99.6439	2.85395	0.0090731	66.3594	0.204801
37122-08	456PRB	17	6	2.70618e-15	0.342906	0.0014671	0.117471	0.0002263	0.0014112	1.84e-05	5.54e-05	7.9404e-06	3.57e-05	1.22e-05	96.9162	2.82547	0.0343931	65.709	0.776605
37122-10	456PRB	17	6	1.66007e-15	0.210416	0.0014235	0.0731579	0.0002	0.00086	1.7e-05	2.57e-05	7.9925e-06	2.43e-05	1.2e-05	96.5663	2.7739	0.0536775	64.5308	1.21284
37122-11	456PRB	17	6	3.1084e-15	0.393997	0.0013572	0.132174	0.0002335	0.0015576	1.84e-05	3.15e-05	7.78974e-06	4.82e-05	1.26e-05	96.3612	2.86879	0.0311092	66.6981	0.702074
37122-12	456PRB	17	6	2.34185e-15	0.296836	0.0014671	0.103532	0.0002126	0.001177	2e-05	2.92e-05	7.839e-06	1.45e-05	1.21e-05	98.5516	2.82196	0.0387058	65.629	0.874025
37122-13	456PRB	17	6	2.84315e-15	0.360366	0.0014534	0.124391	0.0002335	0.0014881	2e-05	2.21e-05	8.0455e-06	2.09e-05	1.22e-05	98.2759	2.84346	0.0324766	66.1199	0.733165
37122-16	456PRB	17	6	2.60489e-15	0.330137	0.0014909	0.114553	0.0002126	0.0013543	1.92e-05	3.19e-05	7.69415e-06	2.4e-05	1.19e-05	97.8388	2.81608	0.0346027	65.4947	0.78143
37122-17	456PRB	17	6	3.29343e-15	0.417389	0.0015698	0.145164	0.0002408	0.0016927	2.08e-05	6.47e-05	8.2662e-06	2.75e-05	1.2e-05	98.0522	2.8157	0.0278494	65.4859	0.628925
37122-18	456PRB	18b	6	5.07121e-15	0.641752	0.0021288	0.223182	0.000247	0.0028248	3.55e-05	1.42e-05	8.76641e-06	2.07e-05	1.51e-05	99.0429	2.84376	0.0227992	66.1268	0.514694
37122-19	456PRB	18b	6	8.04844e-15	1.01861	0.0022472	0.35478	0.0004111	0.0043028	4.49e-05	7.17e-05	8.87694e-06	9.34e-06	1.53e-05	99.7438	2.85955	0.0150003	66.4872	0.338566
37122-20	456PRB	18b	6	5.08586e-15	0.643678	0.0021954	0.224037	0.0002907	0.0026407	2.47e-05	4.78e-05	9.12359e-06	1.43e-05	1.52e-05	99.3559	2.8504	0.0231174	66.2782	0.521835
37122-21	456PRB	18b	6	1.88168e-15	0.23817	0.0020318	0.0817762	0.0001838	0.0009621	1.91e-05	5.15739e-06	8.87694e-06	1.87e-05	1.49e-05	97.6624	2.84021	0.060655	66.0456	1.36935
37122-24	456PRB	18b	6	2.12883e-15	0.269557	0.0020248	0.0925332	0.0001838	0.001127	1.91e-05	2.27e-05	9.0377e-06	1.42e-05	1.5e-05	98.4479	2.86367	0.053727	66.5813	1.21259
37122-25	456PRB	18b	6	3.54726e-15	0.449168	0.0019416	0.15538	0.000222	0.0018424	2.06e-05	4.25e-05	9.25905e-06	1.47e-05	1.47e-05	99.0487	2.85908	0.0314044	66.4765	0.708823
37122-26	456PRB	18b	6	1.47043e-15	0.18614	0.0019866	0.0641621	0.0001838	0.0007375	1.84e-05	2.67e-05	8.87694e-06	2.57e-05	1.46e-05	95.907	2.77828	0.0755768	64.6309	1.70755
37122-27	456PRB	18b	6	2.8252e-15	0.357559	0.0020318	0.123719	0.000214	0.0014313	1.98e-05	4.06e-05	9.0802e-06	3.76e-06	1.47e-05	99.7126	2.87755	0.039703	66.8982	0.895921
37122-28	456PRB	18b	6	3.939e-15	0.498629	0.0020616	0.171658	0.000214	0.0020984	3.18e-05	5.81e-05	8.95545e-06	1.92e-05	1.49e-05	98.88	2.86804	0.0291064	66.6811	0.65688
37122-35	456PRB	18a	6	4.24196e-15	0.537147	0.0009879	0.18683	0.0001922	0.0021781	2.04e-05	2.84e-05	8.87694e-06	7.07e-06	1.06e-05	99.6193	2.85988	0.0181844	66.4947	0.410431
37122-36	456PRB	18a	6	3.74703e-15	0.474458	0.0009291	0.163276	0.0001823	0.0019527	2.8e-05	2.94e-05	8.91572e-06	1.66e-05	1.08e-05	98.9713	2.87174	0.0209312	66.7654	0.472359
37122-37	456PRB	18a	6	5.06773e-15	0.64167	0.0010918	0.22306	0.000212	0.0028666	2.99e-05	5.63e-05	8.87694e-06	3.02e-05	1.09e-05	98.6187	2.83274	0.015907	65.8752	0.359152
37122-38	456PRB	18a	6	2.55585e-15	0.323601	0.0006382	0.111926	0.0001528	0.0013338	1.58e-05	2.21e-05	9.0377e-06	1.47e-05	1.04e-05	98.6576	2.84817	0.0287973	66.2274	0.650066
37122-39	456PRB	18a	6	1.78373e-15	0.225821	0.0008092	0.0781872	0.0001138	0.0009426	1.49e-05	2.05e-05	8.91572e-06	2.75e-05	1.08e-05	96.3875	2.77976	0.0427331	64.6648	0.965478
37122-40	456PRB	18a	6	1.84955e-15	0.234169	0.0005906	0.0798366	0.0001138	0.0009275	1.49e-05	2.3e-05	8.99611e-06	8.65e-06	1.05e-05	98.9205	2.89717	0.0404124	67.3457	0.911706
37122-41	456PRB	18a	6	3.65869e-15	0.463241	0.0009625	0.161202	0.0001626	0.0019644	3.18e-05	3.54e-05	9.21303e-06	1.81e-05	1.08e-05	98.8525	2.83648	0.021299	65.9605	0.48087
37122-42	456PRB	18a	6	1.9714e-15	0.249566	0.000794	0.0867177	0.000143	0.0010614	1.4e-05	2.14e-05	8.87694e-06	2.68e-05	1.08e-05	96.8166	2.78218	0.0386031	64.7202	0.872141
37122-45	456PRB	18a	6	1.31369e-14	1.66303	0.0018736	0.574388	0.0005008	0.0068557	5.25e-05	0.0001467	9.81835e-06	4.5e-05	1.16e-05	99.2135	2.86829	0.0077092	66.6867	0.173982
37122-46	456PRB	18a	6	3.20654e-15	0.405915	0.000644	0.140106	0.0001626	0.0016941	2.51e-05	3.15e-05	9.25905e-06	1.91e-05	1.11e-05	98.6135	2.85279	0.0245032	66.333	0.5531
37122-47	456PRB	18a	6	4.5715e-15	0.578741	0.0009794	0.200062	0.0001823	0.0024452	3.18e-05	5.39e-05	8.99611e-06	2.4e-05	1.07e-05	98.7835	2.8534	0.0170488	66.3467	0.384831
37122-50	456PRB	18a	6	3.56827e-15	0.451757	0.0009625	0.156478	0.0001626	0.0018361	1.67e-05	3.19e-05	8.87694e-06	3.08e-05	1.09e-05	97.978	2.82445	0.0220449	65.6859	0.497785
37122-51	456PRB	18a	6	3.88304e-15	0.49164	0.0010394	0.170529	0.0001528	0.0020091	1.67e-05	2.82e-05	9.0377e-06	9.88e-06	1.08e-05	99.414	2.86188	0.0202674	66.5404	0.457435
37122-52	456PRB	18a	6	4.42548e-15	0.560368	0.0009541	0.194393	0.0001823	0.002327	1.85e-05	2.58e-05	9.0377e-06	1.85e-05	1.07e-05	99.0238	2.85026	0.0174931	66.2752	0.394876
37122-03	456PRB	17	6	5.9981e-16	0.076031	0.0013463	0.0260847	0.0001802	0.0003101	1.53e-05	0.0041027	3.96e-05	1.91e-05	1.2e-05	100.011	2.91693	0.149655	67.7967	3.37538
37122-09	456PRB	17	6	1.43077e-16	0.0181322	0.0013202	0.0065741	0.0001712	8.04e-05	1.45e-05	0.0008392	1.29e-05	1.21e-05	1.16e-05	86.6351	2.39014	0.569479	55.7394	12.9294
37122-22	456PRB	18b	6	1.76826e-16	0.0223884	0.001932	0.0082786	0.0001415	7.33e-05	1.84e-05	0.0007832	1.25e-05	1.48e-05	1.47e-05	88.6614	2.39896	0.58625	55.9419	13.3087
37122-23	456PRB	18b	6	3.45012e-16	0.0436861	0.0019268	0.0154746	0.0001486	0.0001682	1.91e-05	0.0009937	1.8e-05	2.46e-05	1.48e-05	88.6711	2.50295	0.31429	58.3282	7.12552
37122-44	456PRB	18a	6	2.45097e-16	0.0310273	0.0005686	0.0106876	6.75e-05	7.78e-05	1.32e-05	0.0008498	1.27e-05	1.45e-05	1.07e-05	92.9162	2.69815	0.303404	62.7989	6.86188
37122-48	456PRB	18a	6	3.33656e-16	0.042244	0.0005814	0.0145112	6.75e-05	0.0001702	1.03e-05	0.0008871	1.37e-05	1.66e-05	1.05e-05	93.6038	2.72455	0.221313	63.4028	5.00363
37122-49	456PRB	18a	6	5.41362e-16	0.0685382	0.000577	0.0236541	5.52e-05	0.0002688	1.14e-05	0.0014585	2.07e-05	2.26e-05	1.05e-05	95.5355	2.76782	0.13501	64.3919	3.05076
Weighted Mean																2.85319	0.00323943	66.0991	0.0760118
Sample TR13-3			J = 0.013200 ± 2.75785E-06
36837-01	430PRB	1a	6	9.08834e-15	1.1501	0.0014591	0.403539	0.0005511	0.004896	4.9e-05	0.000652	1.37e-05	4.71e-05	1.22e-05	98.7914	2.81367	0.0110699	65.9304	0.251276
36837-02	430PRB	1a	6	9.54506e-15	1.20795	0.0016275	0.425186	0.0006297	0.0049435	3.22e-05	0.0005389	1.26e-05	2.29e-05	1.22e-05	99.4465	2.82333	0.0108927	66.1526	0.247225
36837-04	430PRB	1a	6	9.13828e-15	1.15669	0.0015424	0.398158	0.0005805	0.0049207	4.52e-05	0.0012006	1.45e-05	0.0001256	1.25e-05	96.7862	2.80983	0.0116089	65.842	0.263525
36837-05	430PRB	1a	6	1.11554e-14	1.41193	0.0014591	0.497753	0.0005609	0.0059535	5e-05	0.0007702	1.53e-05	3.15e-05	1.18e-05	99.3483	2.81619	0.0089677	65.9884	0.203551
36837-06	430PRB	1a	6	1.21889e-14	1.54262	0.0017143	0.468481	0.0006198	0.0057656	5.39e-05	0.0008489	2.34e-05	0.0007211	1.48e-05	86.0555	2.83181	0.0120056	66.3477	0.272455
36837-07	430PRB	1a	6	1.66404e-14	2.10607	0.0019821	0.723528	0.000679	0.0085934	3.58e-05	0.0011085	1.53e-05	0.0001972	1.32e-05	97.2174	2.82791	0.0075653	66.2581	0.171696
36837-08	430PRB	1a	6	7.27856e-15	0.921201	0.0010069	0.323686	0.0004924	0.0038945	3.13e-05	0.0006307	1.2e-05	4.29e-05	1.17e-05	98.6263	2.80495	0.01257	65.7298	0.285358
36837-09	430PRB	1a	6	9.50853e-15	1.20375	0.0015424	0.423784	0.0005805	0.0051023	4.52e-05	0.0006176	1.88e-05	3.6e-05	1.24e-05	99.12	2.81355	0.0108018	65.9276	0.245192
36837-10	430PRB	1a	6	1.02554e-14	1.29836	0.0018025	0.456336	0.0005707	0.0055405	5.58e-05	0.0005978	1.79e-05	3.99e-05	1.22e-05	99.0948	2.81749	0.0101981	66.0182	0.231478
36837-13	430PRB	1a	6	1.19612e-14	1.5141	0.0021654	0.532859	0.0005903	0.0063932	5.68e-05	0.0012545	2.63e-05	4.13e-05	1.24e-05	99.2085	2.81704	0.0093173	66.008	0.211485
36837-14	430PRB	1a	6	1.19745e-14	1.51564	0.0018918	0.534395	0.0006002	0.0064013	4.9e-05	0.000662	1.53e-05	1.41e-05	1.24e-05	99.7334	2.82666	0.0090639	66.2293	0.205708
36837-16	430PRB	1a	6	8.99906e-15	1.13917	0.0014591	0.39983	0.0005315	0.0047923	5.1e-05	0.0004556	1.23e-05	1.81e-05	1.18e-05	99.5352	2.83393	0.0108469	66.3965	0.246153
36837-17	430PRB	1a	6	1.2707e-14	1.60845	0.0016275	0.56265	0.0007481	0.0067533	4.71e-05	0.0014276	1.62e-05	4.66e-05	1.27e-05	99.1583	2.83269	0.0089359	66.3679	0.202788
36837-18	430PRB	1a	6	8.66263e-15	1.09646	0.001378	0.386504	0.0005413	0.0046485	3.96e-05	0.0004467	1.2e-05	3.88e-05	1.18e-05	98.9543	2.80525	0.0111372	65.7366	0.252831
36837-19	430PRB	1a	6	7.40649e-15	0.937502	0.0014591	0.331392	0.0005315	0.0039837	4.14e-05	0.000447	1.62e-05	3.84e-05	1.22e-05	98.7916	2.79286	0.0131608	65.4514	0.298817
36837-20	430PRB	1a	6	6.6065e-15	0.836339	0.0012996	0.289711	0.0004827	0.0035054	3.04e-05	0.0004085	1.29e-05	5.75e-05	1.2e-05	97.9612	2.826	0.0144516	66.2141	0.327988
36837-23	430PRB	2	6	8.1489e-15	1.03101	0.0021633	0.361902	0.0004572	0.0042917	3.01e-05	0.0002412	1.19e-05	3.73e-05	1.52e-05	98.9316	2.81591	0.0149187	65.9819	0.338632
36837-25	430PRB	2	6	1.90044e-14	2.40467	0.0030806	0.83014	0.0009335	0.0100512	6.4e-05	0.0005617	1.46e-05	0.0002158	1.7e-05	97.3316	2.81689	0.0088558	66.0046	0.201011
36837-26	430PRB	2	6	7.6518e-15	0.968287	0.0021095	0.339845	0.0005362	0.0041199	4.34e-05	0.0002298	1.13e-05	2.86e-05	1.54e-05	99.1304	2.82189	0.0160972	66.1196	0.365354
36837-27	430PRB	2	6	1.06113e-14	1.34281	0.0025456	0.4703	0.0007742	0.0054895	3.38e-05	0.0003425	1.19e-05	3.48e-05	1.58e-05	99.2378	2.83093	0.01299	66.3274	0.294798
36837-28	430PRB	2	6	1.03793e-14	1.31339	0.0022804	0.462559	0.0006451	0.0055071	4.63e-05	0.000348	1.12e-05	3.55e-05	1.56e-05	99.2064	2.81433	0.0125772	65.9456	0.28549
36837-30	430PRB	2	6	6.38948e-15	0.808513	0.0020591	0.283411	0.0004474	0.0033557	2.46e-05	0.0001852	1.18e-05	3.3e-05	1.53e-05	98.7929	2.81582	0.0187419	65.98	0.425413
36837-31	430PRB	3c	6	7.08182e-15	0.896802	0.0013793	0.317358	0.0004601	0.0038862	4.21e-05	0.000158	1.11e-05	-4.33e-06	1.24e-05	100.156	2.82742	0.0134295	66.2467	0.304785
36837-32	430PRB	3c	6	7.13548e-15	0.903495	0.0017692	0.318592	0.0005288	0.0038567	4.4e-05	0.0001957	1.11e-05	2.9e-05	1.22e-05	99.0573	2.80635	0.0139385	65.762	0.31642
36837-33	430PRB	3c	6	8.08678e-15	1.02388	0.0016279	0.362188	0.0005091	0.0042921	2.96e-05	0.0001863	1.09e-05	8.6e-06	1.3e-05	99.761	2.81733	0.0126177	66.0146	0.286398
36837-35	430PRB	3c	6	7.75049e-15	0.981367	0.0016971	0.345911	0.000519	0.0040197	2.96e-05	0.0001783	1.17e-05	3.14e-05	1.28e-05	99.0567	2.80746	0.0131612	65.7875	0.298771
36837-36	430PRB	3c	6	9.11159e-15	1.15375	0.0016279	0.406292	0.0007363	0.0048755	2.86e-05	0.0002271	1.12e-05	1.87e-05	1.27e-05	99.5283	2.82347	0.0117927	66.1558	0.26765
36837-37	430PRB	3c	6	6.04542e-15	0.765524	0.0015621	0.26929	0.0004114	0.0031618	2.49e-05	0.0001591	1.12e-05	2.22e-05	1.24e-05	99.1481	2.8157	0.0158639	65.977	0.360087
36837-38	430PRB	3c	6	8.74715e-15	1.10753	0.0016279	0.392765	0.0005091	0.0046744	4.31e-05	0.0002072	1.12e-05	2.53e-05	1.26e-05	99.3304	2.79813	0.0114614	65.5727	0.260215
36837-39	430PRB	3c	6	1.15099e-14	1.45727	0.0017692	0.512242	0.000776	0.0061478	3.15e-05	0.0002546	1.11e-05	2.14e-05	1.3e-05	99.5727	2.82987	0.0098318	66.3031	0.223128
36837-40	430PRB	3c	6	8.83042e-15	1.11785	0.0018439	0.395593	0.0005288	0.0046394	2.67e-05	0.0002082	1.13e-05	2.02e-05	1.24e-05	99.4712	2.80798	0.011548	65.7995	0.262149
36837-41	430PRB	5d	6	9.79668e-15	1.2397	0.0012238	0.434682	0.0005626	0.0051453	4.4e-05	7.4e-05	9.44934e-06	1.67e-05	1.2e-05	99.6098	2.8369	0.0101399	66.4648	0.230099
36837-42	430PRB	5d	6	9.42386e-15	1.19253	0.001322	0.414557	0.0005427	0.0048861	2.95e-05	0.0001101	8.9627e-06	7.35e-05	1.2e-05	98.1756	2.82025	0.0106084	66.0819	0.24078
36837-43	430PRB	5d	6	1.10968e-14	1.40423	0.0015191	0.490251	0.0005825	0.0059321	5.58e-05	7.72e-05	1.15e-05	3.11e-05	1.17e-05	99.3499	2.84174	0.0092204	66.5762	0.209221
36837-44	430PRB	5d	6	1.02182e-14	1.29299	0.0014204	0.452689	0.0006223	0.0054251	5.08e-05	6.02e-05	9.38616e-06	2.78e-05	1.17e-05	99.3677	2.83424	0.0099352	66.4037	0.225462
36837-45	430PRB	5d	6	8.8144e-15	1.1153	0.0012238	0.391987	0.0005427	0.0046474	2.95e-05	6.91e-05	8.84816e-06	3.65e-05	1.12e-05	99.0349	2.81387	0.0105532	65.9351	0.239549
36837-46	430PRB	5d	6	7.54673e-15	0.954865	0.0012238	0.335399	0.000483	0.0040658	4.3e-05	0.0001372	9.70824e-06	2.83e-05	1.14e-05	99.1441	2.81867	0.0121155	66.0455	0.274994
36837-47	430PRB	5d	6	8.17268e-15	1.03412	0.0012238	0.363358	0.0004632	0.0043382	2.66e-05	5.87e-05	8.79204e-06	4.32e-05	1.18e-05	98.7623	2.80689	0.0115008	65.7745	0.26108
36837-48	430PRB	5d	6	8.82588e-15	1.1167	0.0012238	0.39239	0.0005327	0.0047147	4.5e-05	6.34e-05	8.90506e-06	2.75e-05	1.14e-05	99.2766	2.82137	0.0106371	66.1075	0.241429
36837-49	430PRB	5d	6	9.8309e-15	1.24394	0.0011259	0.432199	0.0006323	0.0052236	4.69e-05	8.46e-05	9.0802e-06	6.85e-05	1.17e-05	98.3688	2.82729	0.0102033	66.2438	0.231567
36837-50	430PRB	5d	6	1.0877e-14	1.37648	0.0014204	0.482404	0.0006423	0.0055914	4.79e-05	8.75e-05	9.32363e-06	5.47e-05	1.17e-05	98.8246	2.81592	0.0094556	65.9823	0.214628
36837-51	430PRB	8a	6	1.02101e-14	1.29296	0.0017032	0.448564	0.0005422	0.0054444	4.27e-05	1.74e-05	1.47e-05	8.82e-05	1.72e-05	97.9883	2.8183	0.0132785	66.0369	0.301392
36837-53	430PRB	8a	6	7.91486e-15	1.00205	0.001543	0.343744	0.0005024	0.0040626	2.77e-05	1.04e-05	1.43e-05	0.0001257	1.76e-05	96.2724	2.80031	0.0171156	65.6229	0.388574
36837-54	430PRB	8a	6	6.29989e-15	0.797657	0.0013789	0.275641	0.000403	0.0032816	3.32e-05	4.71686e-06	1.43e-05	8.16e-05	1.73e-05	96.9566	2.79961	0.0203594	65.6067	0.462221
36837-55	430PRB	8a	6	7.70817e-15	0.975847	0.0013932	0.333431	0.0004825	0.0040069	3.89e-05	1.28e-05	1.49e-05	9.48e-05	1.74e-05	97.1245	2.83631	0.0173121	66.4513	0.392857
36837-56	430PRB	8a	6	8.23316e-15	1.04241	0.0014666	0.363976	0.0005123	0.00435	3.32e-05	9.76848e-06	1.42e-05	2.85e-05	1.74e-05	99.2	2.83481	0.015981	66.4168	0.362659
36837-57	430PRB	8a	6	9.13208e-15	1.15624	0.001622	0.404353	0.0005024	0.0047437	3.23e-05	2.77e-05	1.52e-05	4.9e-05	1.75e-05	98.7768	2.81831	0.0146226	66.0372	0.3319
36837-59	430PRB	8a	6	1.13853e-14	1.44155	0.0018711	0.504734	0.000602	0.0059277	3.42e-05	1.9e-05	1.52e-05	3.73e-05	1.72e-05	99.2511	2.82846	0.0121239	66.2706	0.275151
36837-60	430PRB	8a	6	6.41003e-15	0.811639	0.0014666	0.280501	0.0003931	0.0034038	4.56e-05	2.41422e-06	1.48e-05	3.52e-05	1.73e-05	98.7127	2.85001	0.0201129	66.7665	0.456337
36837-61	430PRB	9a	6	1.41797e-14	1.79752	0.0016726	0.628429	0.0005967	0.007533	5.35e-05	-2.29334e-06	1.09e-05	7.27e-05	1.47e-05	98.7699	2.81661	0.0094142	65.998	0.214542
36837-63	430PRB	9a	6	1.17455e-14	1.48876	0.0015835	0.522455	0.0005967	0.0062144	3.64e-05	2.52571e-07	1.06e-05	3.96e-05	1.41e-05	99.2076	2.81842	0.0106514	66.0398	0.24273
36837-64	430PRB	9a	6	6.91895e-15	0.876902	0.001244	0.30677	0.0005385	0.0036672	3.98e-05	1.65e-05	1.04e-05	2.48e-05	1.46e-05	99.5031	2.83595	0.0173203	66.4431	0.394617
36837-65	430PRB	9a	6	9.1226e-15	1.1559	0.0014098	0.407734	0.0006161	0.0048302	3.55e-05	3.13187e-07	1.04e-05	-6.53e-06	1.39e-05	100.173	2.83126	0.0131002	66.3351	0.298485
36837-67	430PRB	9a	6	1.17509e-14	1.489	0.0014959	0.524476	0.0006161	0.0064104	5.91e-05	2e-05	1.08e-05	4.21e-05	1.39e-05	99.4058	2.81379	0.0105508	65.9331	0.240451
36837-68	430PRB	9a	6	1.12613e-14	1.42679	0.0014098	0.502412	0.0006259	0.0059039	3.55e-05	-7.33465e-06	1.04e-05	2.78e-05	1.43e-05	99.3222	2.81204	0.0110705	65.8929	0.252302
36837-70	430PRB	9a	6	9.57335e-15	1.21331	0.0014959	0.425397	0.0006259	0.0051172	4.88e-05	3.26321e-06	1.06e-05	1.44e-05	1.4e-05	99.6957	2.83494	0.0127704	66.4197	0.290957
36837-03	430PRB	1a	6	3.89131e-16	0.0492462	0.0009348	0.0174674	0.0001487	0.0002348	1.66e-05	0.0134893	4.87e-05	3.06e-05	1.12e-05	88.8285	2.50717	0.201363	58.8639	4.58846
36837-11	430PRB	1a	6	6.09727e-16	0.0771809	0.0009538	0.0252584	0.0001628	0.000295	1.78e-05	0.0125108	6.85e-05	3.23e-05	1.17e-05	91.9056	2.80972	0.145806	65.8396	3.30983
36837-12	430PRB	1a	6	7.15456e-16	0.0905697	0.0009441	0.0321048	0.0001703	0.0003945	1.69e-05	0.0171371	0.0001103	2.85e-05	1.15e-05	95.7765	2.70346	0.112278	63.3928	2.55214
36837-15	430PRB	1a	6	7.73427e-15	0.97893	0.001378	0.320176	0.0005315	0.0039431	3.96e-05	0.0008285	2.07e-05	0.000143	1.26e-05	95.6606	2.92283	0.0140637	68.4405	0.318796
36837-22	430PRB	2	6	7.89116e-16	0.0998386	0.0018578	0.0343904	0.0001124	0.0004067	1.7e-05	0.0088942	5.27e-05	3.04e-05	1.51e-05	95.2168	2.76477	0.142994	64.8049	3.24783
36837-24	430PRB	2	6	4.19546e-15	0.530857	0.0018603	0.0076316	0.0001287	0.0001151	1.47e-05	0.0084851	6.55e-05	5.84e-05	1.51e-05	97.491	68.0895	1.36505	1159.28	17.0127
36837-34	430PRB	3c	6	9.24246e-16	0.117023	0.0013118	0.0403243	0.000133	0.0005014	1.95e-05	0.0063079	5.97e-05	3.1e-05	1.24e-05	95.6208	2.77466	0.0984132	65.0325	2.23499
36837-58	430PRB	8a	6	5.79102e-16	0.0733123	0.0010531	0.0243518	0.0001204	0.0003214	1.56e-05	0.0001746	1.54e-05	2.54e-05	1.7e-05	94.0896	2.82969	0.214148	66.299	4.86
36837-66	430PRB	9a	6	5.26462e-16	0.0667123	0.0008412	0.0237587	0.0001598	0.0002814	2.11e-05	2.05e-05	1.06e-05	1.85e-05	1.35e-05	97.3876	2.73006	0.193938	64.0055	4.42451
36837-69	430PRB	9a	6	7.17117e-15	0.90869	0.0013257	0.318277	0.0004904	0.0037768	3.14e-05	1.62e-05	1.05e-05	-9.12e-06	1.43e-05	100.631	2.86458	0.0164313	67.1015	0.374228
Weighted Mean																2.82063	0.00153757	66.0907	0.037564
Sample MK13-3			J = 0.013127 ± 3.48374E-06
36851-01	430PRC	3a	6	2.09475e-14	2.65159	0.0036878	0.929397	0.0008649	0.0110838	4.68e-05	0.001088	2.19e-05	9.84e-05	1.78e-05	98.9164	2.81937	0.0079878	65.705	0.180589
36851-02	430PRC	3a	6	1.82447e-14	2.30946	0.0036235	0.811774	0.0008053	0.0095142	4.11e-05	0.000785	1.49e-05	6.18e-05	1.72e-05	99.2209	2.82004	0.0087535	65.7204	0.197899
36851-03	430PRC	3a	6	1.47621e-14	1.86862	0.0033838	0.656397	0.0006367	0.0078668	4.11e-05	0.0008397	1.49e-05	5.63e-05	1.72e-05	99.1275	2.81922	0.0102384	65.7015	0.231471
36851-04	430PRC	3a	6	2.02441e-14	2.56258	0.0037537	0.89661	0.0009345	0.0106135	4.4e-05	0.0011988	1.65e-05	5.95e-05	1.78e-05	99.3346	2.83632	0.008372	66.0928	0.189235
36851-05	430PRC	3a	6	1.48414e-14	1.87898	0.0032249	0.657818	0.0007259	0.0077641	3.92e-05	0.0006905	1.74e-05	3.02e-05	1.71e-05	99.5426	2.84055	0.0101667	66.1897	0.229788
36851-06	430PRC	3a	6	3.04137e-14	3.85102	0.0041037	1.35151	0.0011038	0.0160573	4.97e-05	0.0014504	1.74e-05	5.71e-05	1.78e-05	99.5799	2.83469	0.0061202	66.0556	0.13834
36851-07	430PRC	3a	6	1.79976e-14	2.27895	0.0035609	0.801411	0.000706	0.0097074	7.22e-05	0.0009888	2.37e-05	3.49e-05	1.71e-05	99.569	2.82866	0.0086625	65.9177	0.195819
36851-08	430PRC	3a	6	1.87521e-14	2.3746	0.0035609	0.828868	0.0010042	0.0099791	4.59e-05	0.0012261	1.65e-05	5.39e-05	1.72e-05	99.3538	2.8436	0.0088193	66.2594	0.199325
36851-09	430PRC	3a	6	2.75736e-14	3.49164	0.0042521	1.22475	0.0010042	0.0146965	6.92e-05	0.0009725	1.57e-05	1.99e-05	1.78e-05	99.8468	2.84375	0.0066296	66.2628	0.149837
36851-10	430PRC	3a	6	1.37135e-14	1.73637	0.0031305	0.608007	0.0007358	0.0072355	3.64e-05	0.0006721	2.19e-05	1.22e-05	1.64e-05	99.8129	2.84773	0.0106181	66.3539	0.239969
36851-11	430PRC	3a	6	2.54964e-14	3.22798	0.003821	1.13493	0.0010042	0.0135122	6.14e-05	0.0011903	1.65e-05	5.02e-05	1.78e-05	99.5579	2.82887	0.0068719	65.9224	0.155342
36851-13	430PRC	3a	6	2.80679e-14	3.55382	0.0044045	1.24909	0.0009644	0.0147164	5.17e-05	0.0013844	2.46e-05	2.92e-05	1.78e-05	99.7781	2.83604	0.0065539	66.0864	0.148141
36851-14	430PRC	3a	6	1.20136e-14	1.52106	0.0032249	0.530262	0.0007159	0.0063793	4.4e-05	0.0007167	1.49e-05	2.72e-05	1.7e-05	99.4941	2.85122	0.0124476	66.4337	0.281303
36851-15	430PRC	3a	6	1.92628e-14	2.43861	0.0037537	0.852588	0.0009047	0.0103733	6.33e-05	0.0011191	2.37e-05	2.41e-05	1.72e-05	99.733	2.84983	0.0085789	66.402	0.193878
36851-16	430PRC	3a	6	2.30216e-14	2.91534	0.0041037	1.02075	0.0009445	0.0123603	7.61e-05	0.0014119	2.56e-05	6.39e-05	1.72e-05	99.3756	2.83549	0.0075323	66.074	0.170257
36851-17	430PRC	3a	6	2.64485e-14	3.34914	0.0039598	1.17624	0.0008947	0.0140099	5.07e-05	0.001104	1.57e-05	3.63e-05	1.78e-05	99.6965	2.83591	0.0066279	66.0834	0.149814
36851-18	430PRC	3a	6	1.88294e-14	2.38448	0.0036878	0.832138	0.0007953	0.0098504	4.21e-05	0.0011873	1.65e-05	5.51e-05	1.7e-05	99.3408	2.84382	0.0085405	66.2645	0.193025
36851-20	430PRC	3a	6	2.41631e-14	3.05982	0.0041037	1.04349	0.0009047	0.0126978	6.92e-05	0.0015141	2.56e-05	0.0003004	1.91e-05	97.0989	2.84446	0.0078017	66.2791	0.176325
36851-21	430PRC	3a	6	2.17986e-14	2.7605	0.0038897	0.963862	0.0009544	0.0116027	6.33e-05	0.0014554	2.74e-05	6.61e-05	1.78e-05	99.3175	2.84169	0.0079456	66.2157	0.179583
36851-22	430PRC	3a	6	1.87716e-14	2.37725	0.003821	0.83889	0.0007854	0.0099396	5.46e-05	0.0009162	1.65e-05	3.45e-05	1.67e-05	99.5896	2.81941	0.0084682	65.7059	0.191449
36851-23	430PRC	3a	6	2.31383e-14	2.93016	0.003821	1.02609	0.0009146	0.0125415	6.73e-05	0.0009434	1.74e-05	5.65e-05	1.72e-05	99.4445	2.83702	0.0073058	66.1089	0.165134
36851-24	430PRC	3a	6	2.09599e-14	2.6543	0.003821	0.929011	0.0007953	0.0111645	7.41e-05	0.0010639	1.57e-05	4.02e-05	1.78e-05	99.5726	2.84214	0.0079918	66.226	0.180627
36851-25	430PRC	3a	6	9.61306e-15	1.21724	0.0030871	0.423299	0.0005873	0.0050331	3.09e-05	0.0005015	1.33e-05	3.71e-05	1.65e-05	99.1162	2.8474	0.0147615	66.3462	0.33361
36851-26	430PRC	3a	6	1.25592e-14	1.59023	0.0032249	0.5534	0.0007159	0.0065481	3.55e-05	0.0005542	1.33e-05	6.19e-05	1.65e-05	98.8599	2.83803	0.0117487	66.1319	0.265553
36851-27	430PRC	3a	6	1.36648e-14	1.73022	0.0031765	0.602224	0.0006862	0.0072555	4.97e-05	0.0004545	1.28e-05	4.32e-05	1.72e-05	99.2716	2.84933	0.0110033	66.3906	0.24867
36851-28	430PRC	3a	6	1.64418e-14	2.08183	0.0033287	0.719471	0.000706	0.0087976	5.55e-05	0.0008596	1.49e-05	0.0001446	1.72e-05	97.952	2.83153	0.0094739	65.9833	0.214154
36851-29	430PRC	3a	6	2.31826e-14	2.93534	0.0037537	1.03128	0.0008848	0.012516	6.63e-05	0.0012205	2.37e-05	3.97e-05	1.71e-05	99.6228	2.83279	0.0071862	66.0122	0.162438
36851-30	430PRC	3a	6	2.29505e-14	2.90601	0.0042521	1.0145	0.0009445	0.0121169	4.59e-05	0.0012005	1.57e-05	7.41e-05	1.78e-05	99.2643	2.84062	0.0077855	66.1913	0.175968
36851-31	430PRC	5b	6	1.71973e-14	2.17638	0.0020809	0.763679	0.0007515	0.0092929	5.29e-05	0.0002861	1.13e-05	4.01e-05	1.35e-05	99.4713	2.83105	0.0074816	65.9723	0.169119
36851-32	430PRC	5b	6	1.89698e-14	2.40097	0.0026833	0.846194	0.0012009	0.010195	6.57e-05	0.0002929	1.33e-05	1.85e-05	2.32e-05	99.7903	2.82768	0.0103277	65.8951	0.233465
36851-33	430PRC	5b	6	1.03772e-14	1.31319	0.0018439	0.460126	0.0005819	0.0055043	4.5e-05	0.0001656	1.01e-05	3.92e-05	1.28e-05	99.1296	2.82532	0.0105851	65.841	0.23929
36851-34	430PRC	5b	6	2.06162e-14	2.60901	0.0023324	0.916789	0.0008014	0.0111027	7.46e-05	0.0003203	1.33e-05	2.69e-05	1.32e-05	99.7143	2.83386	0.0066092	66.0365	0.149395
36851-35	430PRC	5b	6	2.18281e-14	2.76241	0.0031385	0.970836	0.0008912	0.0116191	6.97e-05	0.000287	1.5e-05	3.34e-05	1.38e-05	99.6573	2.83181	0.0069391	65.9896	0.156855
36851-36	430PRC	5b	6	3.4728e-14	4.39502	0.0037	1.54742	0.0010011	0.0186088	8.65e-05	0.0004924	1.67e-05	3.31e-05	1.41e-05	99.7948	2.83057	0.0053419	65.9613	0.120753
36851-37	430PRC	5b	6	1.36823e-14	1.73173	0.0018439	0.606637	0.0005919	0.0073168	4.9e-05	0.0002208	1.41e-05	1.58e-05	1.29e-05	99.7508	2.84368	0.0083807	66.2612	0.189413
36851-39	430PRC	5b	6	2.64543e-14	3.3474	0.0031385	1.17024	0.0008813	0.0140938	7.56e-05	0.0004179	1.09e-05	3.47e-05	1.48e-05	99.7129	2.84838	0.0062125	66.3689	0.140401
36851-40	430PRC	5a	6	1.09046e-14	1.37966	0.0014616	0.481577	0.0005927	0.0055958	2.79e-05	0.000125	8.91403e-06	6.23e-05	1.19e-05	98.6662	2.82285	0.0094629	65.7847	0.213928
36851-41	430PRC	9a	6	2.01572e-14	2.55541	0.0023211	0.894965	0.000822	0.0110363	6.2e-05	1.71e-05	1.1e-05	3.56e-05	1.56e-05	99.7054	2.83843	0.0077075	66.1412	0.174227
36851-42	430PRC	9a	6	1.41555e-14	1.79432	0.0016726	0.627276	0.0006454	0.0075472	6.29e-05	-6.4355e-06	1.07e-05	5.63e-05	1.49e-05	99.0002	2.82334	0.0094782	65.7957	0.214295
36851-43	430PRC	9a	6	2.99007e-14	3.79065	0.003382	1.33227	0.0011089	0.0161533	7.93e-05	-6.67797e-06	1.06e-05	3.01e-05	1.56e-05	99.7328	2.82909	0.0063255	65.9273	0.143004
36851-44	430PRC	9a	6	1.17526e-14	1.48964	0.0014098	0.518446	0.0006551	0.0062717	5.54e-05	-3.65e-05	1.18e-05	1.04e-05	1.56e-05	99.3558	2.84588	0.0115134	66.3116	0.260236
36851-45	430PRC	9a	6	1.87143e-14	2.37215	0.0024161	0.831026	0.0008023	0.010079	6.68e-05	1.21e-05	1.06e-05	1.32e-05	1.48e-05	99.9256	2.84385	0.0079824	66.2651	0.18043
36851-46	430PRC	9a	6	2.59677e-14	3.29176	0.0027033	1.15552	0.0008713	0.0139509	7.54e-05	1.51e-05	1.07e-05	2.78e-05	1.56e-05	99.8305	2.83539	0.0065332	66.0715	0.147688
36851-47	430PRC	9a	6	1.71629e-14	2.17559	0.0018541	0.761626	0.0007139	0.0091125	6.1e-05	-1.16e-05	1.18e-05	4.1e-05	1.49e-05	99.3426	2.82912	0.0083144	65.9281	0.187969
36851-48	430PRC	9a	6	2.27994e-14	2.89012	0.0027996	1.01089	0.0009603	0.0121647	7.45e-05	9.79974e-07	1.28e-05	2.03e-05	1.56e-05	99.797	2.84461	0.007453	66.2825	0.168462
36851-49	430PRC	9a	6	2.29023e-14	2.90287	0.0028961	1.01737	0.0008812	0.0123421	7.35e-05	-3.24301e-06	1.06e-05	2.75e-05	1.47e-05	99.6981	2.8361	0.007093	66.0879	0.160341
36851-50	430PRC	9a	6	1.76102e-14	2.23201	0.0021325	0.784465	0.0008417	0.0093481	4.16e-05	-1.99026e-06	1.05e-05	3.19e-05	1.49e-05	99.5564	2.8241	0.0082967	65.8132	0.187581
36851-51	430PRC	9a	6	1.28988e-14	1.63493	0.0018541	0.573011	0.0006064	0.0068016	5.16e-05	2.51e-05	1.06e-05	9.31e-06	1.43e-05	100.106	2.84786	0.010037	66.3568	0.226858
36851-52	430PRC	9a	6	1.86383e-14	2.3623	0.0022266	0.829935	0.0007237	0.010121	6.39e-05	9.62799e-06	1.09e-05	1.47e-05	1.46e-05	99.889	2.83469	0.007783	66.0556	0.175943
36851-53	430PRC	9a	6	4.77041e-14	6.0458	0.0039696	2.11519	0.0013075	0.0254984	0.0001018	3.07e-05	1.1e-05	5.22e-05	1.7e-05	99.8348	2.84503	0.0051742	66.2921	0.116953
36851-54	430PRC	9a	6	1.50063e-14	1.90197	0.0015835	0.66691	0.000763	0.0078684	4.43e-05	2.08e-05	1.07e-05	4.33e-05	1.49e-05	99.516	2.8297	0.0091373	65.9414	0.20657
36851-55	430PRC	9a	6	1.65612e-14	2.09907	0.0017628	0.736782	0.0007925	0.0090579	7.16e-05	1.53e-05	1.04e-05	2.45e-05	1.49e-05	99.7855	2.83439	0.0084899	66.0486	0.191925
36851-57	430PRC	9a	6	1.97946e-14	2.50919	0.0024161	0.880162	0.0008122	0.010672	6.87e-05	-8.41566e-06	1.24e-05	2.64e-05	1.56e-05	99.6261	2.83155	0.0079465	65.9838	0.179646
36851-58	430PRC	9a	6	2.70276e-14	3.42618	0.0028961	1.20181	0.0009998	0.0143409	7.74e-05	1.29e-05	1.08e-05	1.2e-05	1.63e-05	99.9639	2.84127	0.0066445	66.206	0.150193
36851-59	430PRC	9a	6	3.18772e-14	4.04106	0.0031871	1.41999	0.0010098	0.016997	9.59e-05	1.68e-05	1.06e-05	2.02e-05	1.56e-05	99.9269	2.83522	0.0059327	66.0677	0.134113
36851-60	430PRC	9a	6	1.85326e-14	2.34936	0.0023211	0.826754	0.0008812	0.0099591	6.77e-05	8.38535e-06	1.09e-05	1.25e-05	1.47e-05	99.9066	2.83049	0.0080693	65.9595	0.182423
36851-61	430PRC	10a	6	1.67413e-14	2.12171	0.0023345	0.745057	0.0007762	0.0088657	6.21e-05	1.28e-05	9.17878e-06	3.02e-05	1.2e-05	99.7164	2.83091	0.0075836	65.969	0.171443
36851-62	430PRC	10a	6	1.72554e-14	2.18686	0.0024759	0.76383	0.0007393	0.0092019	5.73e-05	-5.1396e-06	9.43398e-06	1.3e-05	1.35e-05	99.7682	2.84746	0.007865	66.3477	0.177769
36851-63	430PRC	10a	6	2.80108e-14	3.55005	0.0032757	1.24441	0.0009076	0.0149584	8.06e-05	3.3e-05	9.17878e-06	4.73e-05	1.43e-05	99.8219	2.83902	0.0057153	66.1547	0.129193
36851-64	430PRC	10a	6	1.50159e-14	1.90345	0.0023345	0.665026	0.0007669	0.007959	5.73e-05	-2.42816e-06	9.17878e-06	2.41e-05	1.21e-05	99.5918	2.84166	0.0084341	66.2151	0.190646
36851-65	430PRC	10a	6	2.49104e-14	3.15656	0.0033615	1.10516	0.0009266	0.0133782	7.77e-05	2.1e-05	9.27847e-06	3.99e-05	1.27e-05	99.781	2.8412	0.0061352	66.2044	0.138682
36851-66	430PRC	10a	6	2.75807e-14	3.49593	0.0032757	1.22113	0.001022	0.0148023	7.18e-05	7.80045e-06	9.32952e-06	2.69e-05	1.43e-05	99.8246	2.84901	0.0059328	66.3831	0.134093
36851-67	430PRC	10a	6	1.97884e-14	2.50726	0.0031064	0.877398	0.0008792	0.0107448	6.5e-05	5.01819e-06	9.0824e-06	3.09e-05	1.35e-05	99.6819	2.83969	0.0074403	66.1701	0.168184
36851-68	430PRC	10a	6	1.55704e-14	1.97299	0.0024759	0.688553	0.0007577	0.0084833	5.82e-05	1.22e-05	9.27847e-06	3.75e-05	1.27e-05	99.5813	2.84465	0.0084469	66.2834	0.190927
36851-70	430PRC	10b	6	1.03681e-14	1.31428	0.0014276	0.456185	0.0005536	0.0054914	4.9e-05	1.36e-05	7.1218e-06	3.73e-05	1.52e-05	99.4	2.85501	0.0119336	66.5205	0.269703
36851-71	430PRC	10b	6	1.47332e-14	1.86726	0.0016119	0.650524	0.0006791	0.0078575	5.97e-05	1.14e-05	7.31095e-06	2.61e-05	1.52e-05	99.7294	2.85383	0.008846	66.4934	0.199926
36851-72	430PRC	10b	6	2.10203e-14	2.66377	0.0025687	0.931226	0.000924	0.0110247	4.33e-05	1.86e-05	7.9196e-06	2.4e-05	1.63e-05	99.8975	2.84879	0.0073446	66.3781	0.166002
36851-73	430PRC	10b	6	1.47377e-14	1.86736	0.0016119	0.653348	0.0006791	0.0079124	5.29e-05	1.58e-05	6.82422e-06	3.1e-05	1.51e-05	99.7085	2.84107	0.0086841	66.2016	0.196298
36851-74	430PRC	10b	6	1.85017e-14	2.34444	0.0021813	0.820765	0.000806	0.0099482	6.65e-05	3.13e-05	7.1218e-06	4.22e-05	1.54e-05	99.7847	2.84161	0.0075911	66.2138	0.171591
36851-75	430PRC	10b	6	2.04597e-14	2.59324	0.0024715	0.902681	0.0006791	0.0111566	7.83e-05	1.08e-05	7e-06	1.48e-05	1.63e-05	99.9324	2.86201	0.0071606	66.6805	0.161818
36851-77	430PRC	10b	6	1.29601e-14	1.64258	0.0015192	0.575488	0.0006403	0.0069661	5.77e-05	1.21e-05	7.37564e-06	2.94e-05	1.54e-05	99.6453	2.83537	0.009892	66.0711	0.223616
36851-78	430PRC	10b	6	1.81004e-14	2.29337	0.0023745	0.803558	0.0007962	0.0096834	6.94e-05	2.37757e-06	7.06045e-06	1.18e-06	1.56e-05	100.01	2.84543	0.0078642	66.3014	0.177755
36851-79	430PRC	10b	6	2.56762e-14	3.25419	0.0030575	1.13838	0.000993	0.0137419	7.04e-05	1.97e-05	7.4411e-06	6e-05	1.63e-05	99.5965	2.8383	0.0063942	66.138	0.14454
36851-80	430PRC	10b	6	1.8976e-14	2.40416	0.0021813	0.838091	0.0007864	0.0101157	6.26e-05	2.28e-05	7.31095e-06	5.05e-05	1.63e-05	99.6033	2.8485	0.0076793	66.3714	0.173568
36851-12	430PRC	3a	6	2.06045e-15	0.260881	0.0029291	0.0018648	0.0001294	6.43e-05	1.91e-05	2.54e-05	1.02e-05	0.0001031	1.66e-05	88.2073	123.319	9.43164	1740.59	84.9506
36851-19	430PRC	3a	6	2.98457e-16	0.0377935	0.0028284	0.008139	0.000133	0.0001186	1.57e-05	0.0214049	0.0001403	7.62e-05	1.59e-05	74.5733	3.509	0.700078	81.4197	15.6918
36851-38	430PRC	5b	6	5.74029e-15	0.726434	0.0015621	0.251559	0.0003333	0.0029713	2.77e-05	0.0002171	1.08e-05	1.33e-05	1.24e-05	99.5067	2.86963	0.0169347	66.8548	0.38262
36851-56	430PRC	9a	6	1.86735e-16	0.0236695	0.0008062	0.0007139	0.0001608	6.3e-05	2.07e-05	7.45589e-06	1.06e-05	4.05e-05	1.35e-05	54.6853	18.384	7.96527	390.852	150.701
36851-69	430PRC	10b	6	1.69466e-14	2.14742	0.0018942	0.74967	0.0007376	0.0089554	6.26e-05	1.45e-05	7.71038e-06	-7.73e-06	1.53e-05	100.268	2.86334	0.0080182	66.711	0.181194
36851-76	430PRC	10b	6	6.64003e-16	0.0841297	0.000736	0.0010823	0.0001771	3.19e-05	1.98e-05	-5.25089e-06	7.4411e-06	8.86e-05	1.44e-05	67.0401	51.4408	9.80125	932.87	137.7
Weighted Mean																2.83807	0.000898343	66.1331	0.0266537
Sample HF-1PR			J = 0.013237 ± 2.81433E-06
36825-01	430PRA	5b	6	2.96098e-14	3.74527	0.0034176	1.32458	0.0010011	0.0156697	5.48e-05	0.00048	1.17e-05	4.32e-05	1.56e-05	99.6749	2.81465	0.0059776	66.1372	0.135958
36825-02	430PRA	5b	6	1.39461e-14	1.76403	0.0019209	0.61324	0.0009811	0.0075023	5.39e-05	0.0001989	1.07e-05	9.47e-05	1.41e-05	98.4152	2.82731	0.0096047	66.4295	0.218419
36825-03	430PRA	5b	6	2.6254e-14	3.32245	0.0034176	1.16647	0.0009212	0.0139081	8.06e-05	0.0003357	1.08e-05	0.000114	1.48e-05	98.9909	2.81589	0.0064024	66.1659	0.145617
36825-05	430PRA	5b	6	8.49339e-15	1.07523	0.0017692	0.374356	0.0005221	0.0044595	2.68e-05	0.0002118	1.11e-05	6.27e-05	1.27e-05	98.2884	2.81939	0.0124784	66.2466	0.283797
36825-06	430PRA	5b	6	1.86526e-14	2.36047	0.0027731	0.833385	0.0008313	0.0097689	4.21e-05	0.0002992	1.08e-05	9.77e-06	1.36e-05	99.8952	2.82573	0.0074526	66.393	0.169482
36825-07	430PRA	5b	6	1.08187e-14	1.36912	0.0018439	0.481195	0.000542	0.0058033	4.99e-05	0.0001635	9.65402e-06	3.75e-05	1.34e-05	99.2001	2.81881	0.0104038	66.2333	0.236616
36825-08	430PRA	5b	6	1.7392e-14	2.2009	0.0020809	0.778831	0.0007814	0.0093622	6.18e-05	0.0002869	1.5e-05	5.64e-05	1.36e-05	99.2551	2.80119	0.0074135	65.8268	0.168644
36825-09	430PRA	5b	6	1.29846e-14	1.64327	0.002	0.581032	0.0006816	0.0068128	3.44e-05	0.0001791	1.05e-05	5.46e-05	1.32e-05	99.0235	2.79692	0.009088	65.7282	0.206749
36825-10	430PRA	5b	6	1.60238e-14	2.02786	0.002	0.715714	0.0006816	0.0087037	5.98e-05	0.0002505	1.09e-05	5.07e-05	1.33e-05	99.2725	2.80904	0.0076593	66.008	0.174219
36825-11	430PRA	5b	6	1.82328e-14	2.30744	0.002506	0.815412	0.0007714	0.009809	5.68e-05	0.0002758	1.12e-05	5.44e-05	1.4e-05	99.3139	2.8067	0.0074663	65.9539	0.169835
36825-12	430PRA	5b	6	1.51247e-14	1.91408	0.002	0.674249	0.0006517	0.0081927	5.98e-05	0.0001899	1.03e-05	4.5e-05	1.33e-05	99.3139	2.81568	0.0079964	66.161	0.181872
36825-13	430PRA	5b	6	1.41653e-14	1.79267	0.0022472	0.630226	0.0006318	0.0073673	3.73e-05	0.0001871	9.5901e-06	4.46e-05	1.32e-05	99.2731	2.82012	0.0085551	66.2636	0.194567
36825-14	430PRA	5b	6	1.2636e-14	1.59911	0.0018439	0.566218	0.0005819	0.0067662	5.48e-05	0.0002497	1e-05	4.17e-05	1.39e-05	99.2457	2.79923	0.0092718	65.7815	0.210923
36825-15	430PRA	5b	6	1.43835e-14	1.82031	0.0021633	0.642521	0.0006816	0.0075731	3.73e-05	0.0002292	1.08e-05	4.14e-05	1.38e-05	99.3403	2.8107	0.0086358	66.0462	0.196426
36825-16	430PRA	5b	6	1.78344e-14	2.25711	0.0024187	0.801583	0.0008213	0.0096289	5.58e-05	0.0003046	1.05e-05	4.54e-05	1.32e-05	99.4198	2.79582	0.0073823	65.7028	0.167947
36825-17	430PRA	5b	6	1.27159e-14	1.60936	0.0019209	0.562686	0.0006816	0.0066887	3.25e-05	0.0001714	9.84937e-06	6.03e-05	1.37e-05	98.8981	2.82492	0.0094806	66.3744	0.215603
36825-18	430PRA	5b	6	1.95843e-14	2.47842	0.002506	0.879268	0.0007714	0.01047	6.97e-05	0.000302	1.07e-05	6.38e-05	1.39e-05	99.25	2.79392	0.0069997	65.659	0.159246
36825-19	430PRA	5b	6	1.12664e-14	1.42577	0.0018439	0.502244	0.0006716	0.0059505	3.25e-05	0.0001925	9.65402e-06	4.09e-05	1.4e-05	99.1636	2.81138	0.0105315	66.0619	0.239544
36825-21	430PRA	5b	6	1.40675e-14	1.77991	0.002	0.630799	0.0007016	0.0074284	3.73e-05	0.0001661	1.03e-05	4.71e-05	1.37e-05	99.2238	2.7961	0.0086659	65.7093	0.197148
36825-22	430PRA	5b	6	1.71293e-14	2.16749	0.0024187	0.767968	0.0007914	0.0091929	4.21e-05	0.0002639	9.98249e-06	5.01e-05	1.4e-05	99.3289	2.79975	0.0078046	65.7936	0.177545
36825-23	430PRA	5b	6	2.31192e-14	2.92567	0.0033242	0.755459	0.0007215	0.0096511	6.97e-05	0.0012314	2.61e-05	0.0026821	2.05e-05	72.6906	2.81164	0.0127813	66.0679	0.290714
36825-24	430PRA	5b	6	2.10429e-14	2.66381	0.0028636	0.944369	0.0008313	0.0115172	7.56e-05	0.000293	1.13e-05	7.33e-05	1.41e-05	99.1963	2.79437	0.0069225	65.6694	0.157489
36825-26	430PRA	5b	6	1.95364e-14	2.47283	0.0027731	0.874243	0.0008313	0.0105058	6.47e-05	0.0004564	1.24e-05	6.42e-05	1.41e-05	99.2536	2.80373	0.0073034	65.8853	0.166136
36825-27	430PRA	5b	6	1.11645e-14	1.4131	0.0018439	0.498187	0.000562	0.0059837	5.68e-05	0.0002736	1.06e-05	3.08e-05	1.28e-05	99.3795	2.81517	0.0098051	66.1495	0.22301
36825-28	430PRA	5b	6	1.3814e-14	1.74835	0.0018439	0.617589	0.0005919	0.00728	3.53e-05	0.0001894	1.03e-05	4.72e-05	1.39e-05	99.2111	2.8049	0.0086026	65.9123	0.195686
36825-29	430PRA	5b	6	1.49447e-14	1.89136	0.0020809	0.665952	0.0006816	0.0079856	5.98e-05	0.0002359	1.01e-05	6.23e-05	1.33e-05	99.0358	2.809	0.0081855	66.0069	0.186189
36825-30	430PRA	5b	6	1.3451e-14	1.70244	0.002	0.588706	0.000562	0.006977	3.82e-05	0.0002963	1.08e-05	0.0001409	1.37e-05	97.5564	2.81746	0.0090627	66.2023	0.20612
36825-31	430PRA	5b	6	1.48192e-14	1.87585	0.002	0.659099	0.0007714	0.0079602	5.29e-05	0.0002294	1.04e-05	6.3e-05	1.35e-05	99.017	2.81439	0.0084318	66.1313	0.191779
36825-32	430PRA	5b	6	1.2438e-14	1.5745	0.0019209	0.55289	0.0006617	0.0066353	5.09e-05	0.0001568	9.40213e-06	7.71e-05	1.33e-05	98.5538	2.80288	0.009444	65.8657	0.214831
36825-33	430PRA	5b	6	1.4909e-14	1.88765	0.0018439	0.668852	0.0007315	0.0078121	3.34e-05	0.0002125	9.91564e-06	3.66e-05	1.34e-05	99.4381	2.80266	0.0081133	65.8606	0.18456
36825-34	430PRA	5b	6	1.10324e-14	1.39695	0.0017692	0.484656	0.0005819	0.0059216	4.9e-05	0.0002622	1.06e-05	7.46e-05	1.34e-05	98.4355	2.83352	0.0103696	66.5727	0.235794
36825-36	430PRA	5b	6	1.52835e-14	1.93575	0.002	0.682247	0.0007016	0.0082501	5.29e-05	0.0002218	1.12e-05	6.6e-05	1.32e-05	99.0009	2.80526	0.0079639	65.9206	0.181156
36825-37	430PRA	5b	6	2.10358e-14	2.66535	0.0027731	0.940204	0.0008413	0.0113119	6.27e-05	0.0003406	1.1e-05	2.04e-05	1.4e-05	99.792	2.82523	0.006887	66.3815	0.15662
36825-38	430PRA	5b	6	9.62124e-15	1.21833	0.0017692	0.427816	0.000542	0.0051248	3.25e-05	0.0001599	9.71854e-06	2.14e-05	1.29e-05	99.4954	2.82968	0.0111965	66.4841	0.254609
36825-40	430PRA	6b	6	1.24894e-14	1.58016	0.0018793	0.5529	0.0006282	0.0065954	5.15e-05	0.0001557	9.18314e-06	7.89e-05	1.52e-05	98.5312	2.81193	0.0101992	66.0746	0.231984
36825-41	430PRA	6a	6	1.65706e-14	2.09663	0.002018	0.744726	0.0008599	0.0087897	3.93e-05	0.0001822	9.66747e-06	3.5e-05	1.37e-05	99.5208	2.79777	0.0078212	65.7479	0.177927
36825-42	430PRA	6a	6	2.12083e-14	2.68327	0.0026875	0.95172	0.0008204	0.0112234	4.41e-05	0.0003006	1.09e-05	4.22e-05	1.41e-05	99.5554	2.80281	0.0068082	65.8641	0.154872
36825-43	430PRA	6a	6	2.91425e-14	3.6872	0.0034673	1.30886	0.001207	0.0155852	5.89e-05	0.0002359	1.59e-05	5.52e-05	1.49e-05	99.5672	2.80086	0.0061648	65.8191	0.140239
36825-44	430PRA	6a	6	1.41043e-14	1.78449	0.0017385	0.628309	0.0006923	0.0075039	5.49e-05	0.0001329	9.66747e-06	6.43e-05	1.41e-05	98.9403	2.80599	0.00872	65.9376	0.198355
36825-46	430PRA	6a	6	1.986e-14	2.51311	0.0026875	0.867695	0.0008401	0.0102118	4.61e-05	0.0002099	9.99049e-06	0.0002512	1.49e-05	97.0332	2.80634	0.0076689	65.9455	0.174444
36825-47	430PRA	6a	6	1.49717e-14	1.8943	0.0016469	0.670616	0.0006629	0.0081296	5.69e-05	0.000172	9.36002e-06	2.23e-05	1.37e-05	99.6693	2.81131	0.0079888	66.0602	0.181709
36825-48	430PRA	6a	6	1.33074e-14	1.68384	0.0016469	0.592347	0.0006727	0.007026	3.83e-05	0.0001185	9.42019e-06	6.67e-05	1.38e-05	98.8322	2.8054	0.0089455	65.9239	0.203484
36825-49	430PRA	6a	6	2.04703e-14	2.59023	0.0027843	0.910865	0.00085	0.0109581	6.18e-05	0.0002159	1.02e-05	4.97e-05	1.41e-05	99.446	2.82386	0.0071507	66.3499	0.162619
36825-04	430PRA	5b	6	1.29418e-14	1.63821	0.002	0.52816	0.0006218	0.0065521	3.25e-05	0.0002324	1e-05	0.0003564	1.48e-05	93.5261	2.89721	0.0108221	67.7082	0.245887
36825-20	430PRA	5b	6	8.91204e-16	0.112779	0.0013118	0.0390141	0.0002054	0.0004635	2.13e-05	0.0045821	4.66e-05	2.57e-05	1.28e-05	99.476	2.87634	0.105397	67.2296	2.39534
36825-25	430PRA	5b	6	1.129e-15	0.142915	0.0013507	0.0491238	0.0001289	0.0005697	2.04e-05	0.0055782	5.25e-05	5e-05	1.25e-05	95.7062	2.78503	0.082037	65.1333	1.86659
36825-35	430PRA	5b	6	8.22669e-15	1.04171	0.0016971	0.368937	0.0005122	0.0045017	4.5e-05	0.0049138	2.7e-05	6.87e-05	1.29e-05	98.7867	2.78611	0.0126719	65.1581	0.288321
36825-39	430PRA	5b	6	1.12576e-14	1.42545	0.0018439	0.487672	0.0005719	0.0058672	5.09e-05	0.0001556	1.03e-05	4.58e-05	1.27e-05	99.0572	2.8916	0.0100608	67.5795	0.228607
36825-45	430PRA	6a	6	1.6875e-14	2.1352	0.0019242	0.713801	0.0007316	0.0085762	3.83e-05	0.0003305	1.09e-05	0.000497	1.56e-05	93.0836	2.78045	0.008829	65.028	0.200898
Weighted Mean																2.80923	0.00124204	66.0125	0.0315452
J = 0.013189 ± 2.90883E-06
36836-01	430PRB	5c	6	1.88993e-14	2.39225	0.0023732	0.844358	0.000728	0.0102659	6.02e-05	0.0003134	1.55e-05	3.89e-05	1.34e-05	99.5344	2.81641	0.0069867	65.9409	0.15854
36836-02	430PRB	5c	6	2.05417e-14	2.60015	0.002938	0.914157	0.0008343	0.0109475	7.4e-05	0.000341	1.55e-05	3.97e-05	1.34e-05	99.5626	2.82824	0.0070074	66.2131	0.158987
36836-03	430PRB	5c	6	1.60961e-14	2.03745	0.002008	0.71699	0.0007762	0.0085873	6.02e-05	0.0002382	1.11e-05	6.73e-05	1.34e-05	99.0311	2.81052	0.0078383	65.8057	0.177876
36836-04	430PRB	5c	6	1.44053e-14	1.82327	0.0018309	0.63981	0.000728	0.0076663	6.02e-05	0.0002458	1.14e-05	7.18e-05	1.33e-05	98.8429	2.81312	0.0084014	65.8654	0.19065
36836-05	430PRB	5c	6	1.51349e-14	1.91565	0.0017442	0.671825	0.0007088	0.0080606	5.53e-05	0.0002665	1.25e-05	4.98e-05	1.32e-05	99.2441	2.82623	0.0079314	66.1667	0.179954
36836-06	430PRB	5c	6	1.67675e-14	2.1223	0.002008	0.743041	0.0007762	0.0088491	6.32e-05	0.0004854	1.39e-05	6.19e-05	1.32e-05	99.1615	2.82866	0.0075645	66.2227	0.171624
36836-07	430PRB	5c	6	1.49936e-14	1.89784	0.0019189	0.625025	0.0006515	0.0074765	3.23e-05	0.0003576	1.55e-05	0.0004797	1.41e-05	92.4788	2.80448	0.0091815	65.6668	0.208374
36836-08	430PRB	5c	6	1.27871e-14	1.61855	0.0019189	0.565437	0.000642	0.0068283	5.24e-05	0.0002201	1.1e-05	9.36e-05	1.32e-05	98.2927	2.81	0.0092155	65.7936	0.209131
36836-09	430PRB	5c	6	2.0855e-14	2.63968	0.0025597	0.927459	0.0008538	0.011325	6.12e-05	0.000367	1.3e-05	0.0001069	1.41e-05	98.8115	2.8087	0.0069496	65.7638	0.157713
36836-10	430PRB	5c	6	1.34463e-14	1.70204	0.0017442	0.595026	0.000844	0.0071473	3.61e-05	0.0003498	1.22e-05	6.9e-05	1.28e-05	98.8196	2.82305	0.0089465	66.0938	0.202994
36836-11	430PRB	5c	6	1.21459e-14	1.53751	0.0019189	0.538345	0.000661	0.006357	3.42e-05	0.0002284	1.08e-05	3.43e-05	1.22e-05	99.3551	2.83392	0.0092048	66.3435	0.208826
36836-12	430PRB	5c	6	2.02693e-14	2.56592	0.0026537	0.899051	0.0008149	0.0105839	3.98e-05	0.000333	1.47e-05	6.39e-05	1.32e-05	99.2744	2.82968	0.0068922	66.246	0.156368
36836-13	430PRB	5c	6	1.70623e-14	2.15989	0.0020981	0.760797	0.0007859	0.0090973	6.02e-05	0.0002926	1.27e-05	5.12e-05	1.34e-05	99.3118	2.81582	0.0075255	65.9273	0.170768
36836-14	430PRB	5c	6	1.65204e-14	2.09126	0.0019189	0.737217	0.0007376	0.0089049	6.41e-05	0.0002594	1.15e-05	3.46e-05	1.32e-05	99.524	2.81955	0.0074725	66.0132	0.169555
36836-15	430PRB	5c	6	1.04465e-14	1.32235	0.0017442	0.460484	0.0007088	0.0055268	5.04e-05	0.0002288	1.13e-05	7.8e-05	1.29e-05	98.2637	2.81817	0.010909	65.9814	0.247537
36836-16	430PRB	5c	6	1.58268e-14	2.00332	0.0019189	0.704007	0.0007376	0.0082946	3.79e-05	0.0002426	1.15e-05	3.66e-05	1.31e-05	99.4725	2.82693	0.0077419	66.1828	0.175652
36836-17	430PRB	5c	6	1.56513e-14	1.98112	0.0018309	0.548083	0.000642	0.0067425	3.51e-05	0.0004865	1.99e-05	0.0014246	1.66e-05	78.5624	2.83626	0.0124237	66.3973	0.281842
36836-18	430PRB	5c	6	1.52312e-14	1.92809	0.0019189	0.668022	0.0007376	0.0080019	3.79e-05	0.0003545	1.25e-05	0.0001464	1.31e-05	97.7592	2.81797	0.0081725	65.9768	0.185443
36836-19	430PRB	5c	6	1.19626e-14	1.51438	0.0016589	0.521325	0.0006896	0.0063349	5.82e-05	0.0003695	1.21e-05	0.0001635	1.25e-05	96.8123	2.80866	0.0095553	65.7628	0.216846
36836-20	430PRB	5c	6	2.45327e-14	3.10571	0.0028429	1.09289	0.0008635	0.01304	7.5e-05	0.000443	1.2e-05	7.67e-05	1.32e-05	99.2838	2.81775	0.0061221	65.9719	0.138917
36836-21	430PRB	5c	6	1.3455e-14	1.70327	0.0019189	0.598714	0.0006515	0.0073043	4.95e-05	0.0002075	1.12e-05	5.21e-05	1.24e-05	99.1061	2.81581	0.0084653	65.9271	0.192092
36836-22	430PRB	5c	6	2.11113e-14	2.67251	0.0027481	0.941285	0.0008538	0.0111137	4.46e-05	0.0003334	1.11e-05	6.78e-05	1.34e-05	99.2604	2.81457	0.0067849	65.8987	0.153965
36836-23	430PRB	5c	6	2.85256e-14	3.61113	0.0030335	1.2651	0.0009806	0.0150135	7.99e-05	0.0004459	1.2e-05	8.35e-05	1.41e-05	99.3276	2.83157	0.0058615	66.2894	0.132981
36836-24	430PRB	5c	6	1.38663e-14	1.75533	0.0017442	0.615094	0.0007184	0.0075115	5.53e-05	0.0002461	1.39e-05	3.93e-05	1.34e-05	99.3522	2.83161	0.0086298	66.2905	0.195788
36836-25	430PRB	5c	6	1.32549e-14	1.67792	0.0019189	0.58973	0.000728	0.0071373	4.95e-05	0.0002088	1.06e-05	4.97e-05	1.27e-05	99.1337	2.81693	0.0088268	65.953	0.200292
36836-26	430PRB	5c	6	1.30636e-14	1.6536	0.0017442	0.578712	0.000728	0.006865	3.61e-05	0.0003976	1.64e-05	4.28e-05	1.24e-05	99.2626	2.83265	0.0087536	66.3144	0.198593
36836-27	430PRB	5c	6	1.25242e-14	1.5856	0.0017442	0.538211	0.0006515	0.0064711	3.51e-05	0.0001875	1.05e-05	0.0002131	1.34e-05	96.0037	2.82468	0.0097074	66.1312	0.220253
36836-28	430PRB	5c	6	2.04484e-14	2.5879	0.0030335	0.897971	0.0008052	0.0108859	6.41e-05	0.0003832	1.2e-05	0.0001832	1.41e-05	97.9084	2.81802	0.0073819	65.978	0.167505
36836-29	430PRB	5c	6	1.11952e-14	1.4168	0.0016589	0.497744	0.000661	0.0059301	3.42e-05	0.0001735	1.06e-05	3.25e-05	1.27e-05	99.3328	2.82378	0.0098269	66.1106	0.222967
36836-31	430PRB	5c	6	1.36278e-14	1.72263	0.0016589	0.607522	0.0006992	0.0071537	3.7e-05	0.0002048	1.14e-05	5.69e-05	1.34e-05	99.0316	2.80439	0.0086252	65.6647	0.195749
36836-32	430PRB	5c	6	1.42074e-14	1.797	0.0019189	0.615106	0.0006992	0.007315	3.51e-05	0.0002195	1.12e-05	0.000219	1.41e-05	96.3786	2.81202	0.0091263	65.84	0.207101
36836-33	430PRB	5c	6	1.6182e-14	2.04664	0.002008	0.717583	0.0007376	0.0084008	4.08e-05	0.0002798	1.17e-05	6.19e-05	1.34e-05	99.1171	2.82328	0.0077781	66.0989	0.176483
36836-34	430PRB	5b	6	1.5883e-14	2.00893	0.0021633	0.707919	0.0007016	0.0084362	6.08e-05	0.0002676	1.1e-05	2.61e-05	1.38e-05	99.6326	2.8237	0.0079907	66.1086	0.181306
36836-35	430PRB	5b	6	2.07619e-14	2.62598	0.0026833	0.926904	0.0009611	0.0110655	6.87e-05	0.0003087	1.13e-05	4.82e-05	1.48e-05	99.4699	2.81438	0.0072475	65.8944	0.164461
36836-36	430PRB	5b	6	1.02948e-14	1.30219	0.0013842	0.458207	0.0006517	0.0054404	3.25e-05	0.0001428	9.5901e-06	1.94e-05	1.37e-05	99.5703	2.82604	0.0108574	66.1624	0.246341
36836-38	430PRB	5b	6	1.40087e-14	1.77194	0.002	0.623102	0.0007415	0.0075738	5.29e-05	0.000205	9.71854e-06	6.67e-05	1.41e-05	98.8936	2.80861	0.0089823	65.7617	0.203842
36836-39	430PRB	5b	6	1.37054e-14	1.73352	0.002	0.604687	0.0007215	0.0073995	5.58e-05	0.0002093	1.07e-05	5.62e-05	1.41e-05	99.0511	2.83592	0.0091965	66.3896	0.208631
36836-40	430PRB	5b	6	1.34664e-14	1.70331	0.0017692	0.598297	0.0007016	0.007161	4.7e-05	0.0001964	1.04e-05	5.77e-05	1.41e-05	99.0052	2.81494	0.0090805	65.9073	0.206056
Weighted Mean																2.82018	0.00131418	66.0278	0.0331563
J = 0.013118 ± 3.62821E-06
36847-01	430PRC	4a	6	2.26499e-14	2.86711	0.0034205	0.998502	0.00123	0.0118394	4.51e-05	0.0006171	1.25e-05	0.0001012	1.62e-05	98.9621	2.8386	0.007429	66.0991	0.167602
36847-03	430PRC	4a	6	1.18396e-14	1.49877	0.0024698	0.52485	0.0009205	0.0064134	5.29e-05	0.0003859	1.16e-05	3.68e-05	1.53e-05	99.2877	2.83228	0.0114982	65.9545	0.259427
36847-04	430PRC	4a	6	1.77076e-14	2.24159	0.0030414	0.786197	0.0010358	0.0096045	5.39e-05	0.0005939	1.87e-05	5.49e-05	1.6e-05	99.2896	2.82792	0.0085818	65.8549	0.193637
36847-05	430PRC	4a	6	1.32531e-14	1.67766	0.0025807	0.583461	0.0009301	0.0070468	5e-05	0.0004313	1.26e-05	4.12e-05	1.56e-05	99.2863	2.85181	0.0106228	66.4011	0.239617
36847-06	430PRC	4a	6	1.18225e-14	1.49651	0.0025239	0.522981	0.0009109	0.0061602	3.44e-05	0.0004026	1.18e-05	1.01e-05	1.53e-05	99.8192	2.85329	0.0115486	66.435	0.260495
36847-07	430PRC	4a	6	2.29394e-14	2.90353	0.003265	1.0088	0.0011327	0.0122105	7.07e-05	0.0006712	1.44e-05	7.87e-05	1.58e-05	99.2092	2.85241	0.0070602	66.4149	0.159255
36847-08	430PRC	4a	6	1.2821e-14	1.62252	0.0024187	0.565235	0.0008538	0.0069037	5.98e-05	0.0003482	1.21e-05	6.85e-05	1.61e-05	98.757	2.83183	0.0108521	65.9443	0.24485
36847-09	430PRC	4a	6	1.69071e-14	2.13918	0.0029698	0.745717	0.0010358	0.0091056	6.77e-05	0.0004752	1.27e-05	3.66e-05	1.62e-05	99.5064	2.85143	0.0090324	66.3926	0.203745
36847-12	430PRC	4a	6	2.41916e-14	3.06195	0.0038275	1.01538	0.00123	0.0121879	4.7e-05	0.0008357	1.52e-05	0.0005821	1.84e-05	94.3441	2.84203	0.0080964	66.1775	0.182652
36847-14	430PRC	4a	6	1.39631e-14	1.76752	0.0026401	0.61689	0.0009684	0.0074943	5.78e-05	0.0003864	1.18e-05	3.39e-05	1.62e-05	99.445	2.84628	0.0104011	66.2748	0.234632
36847-15	430PRC	4a	6	1.53105e-14	1.938	0.0027019	0.677935	0.0010358	0.008383	6.47e-05	0.0004462	1.25e-05	4.54e-05	1.59e-05	99.3196	2.8362	0.0096063	66.0442	0.216732
36847-16	430PRC	4a	6	3.15571e-14	3.99468	0.0038275	1.40322	0.0015241	0.0168948	8.65e-05	0.0011829	2.53e-05	3.18e-05	1.7e-05	99.7858	2.83767	0.0060654	66.0779	0.136841
36847-17	430PRC	4a	6	1.08962e-14	1.37929	0.0025239	0.485632	0.0007596	0.0058416	4.9e-05	0.0003862	1.21e-05	1.98e-05	1.59e-05	99.5927	2.82562	0.0122924	65.8024	0.277368
36847-18	430PRC	4a	6	1.42299e-14	1.80142	0.002832	0.627028	0.0008823	0.0076403	6.08e-05	0.0004946	1.27e-05	9.98e-05	1.59e-05	98.3685	2.82307	0.0101131	65.7441	0.228203
36847-20	430PRC	4a	6	1.26785e-14	1.60526	0.0025807	0.560399	0.0009205	0.0067673	5.49e-05	0.0003775	1.21e-05	3.78e-05	1.59e-05	99.3155	2.84186	0.0111434	66.1736	0.251391
36847-21	430PRC	4a	6	1.56778e-14	1.98516	0.0027659	0.692291	0.0010358	0.0084277	5.68e-05	0.0006016	1.87e-05	8.21e-05	1.62e-05	98.7897	2.82979	0.0095413	65.8977	0.215282
36847-23	430PRC	4a	6	1.1069e-14	1.4012	0.0026401	0.490198	0.0008254	0.005956	5.58e-05	0.0003204	1.09e-05	1.79e-05	1.6e-05	99.6375	2.84503	0.0125153	66.2462	0.28233
36847-24	430PRC	4a	6	1.41827e-14	1.79459	0.0025807	0.629001	0.0009492	0.0074988	3.54e-05	0.0003853	1.52e-05	2.25e-06	1.62e-05	99.9796	2.84945	0.0101416	66.3473	0.22877
36847-25	430PRC	4a	6	1.11002e-14	1.40444	0.0025239	0.485084	0.0007877	0.0058895	4.7e-05	0.0003505	1.61e-05	6.44e-05	1.61e-05	98.65	2.85313	0.0125218	66.4313	0.282449
36847-26	430PRC	4a	6	2.08433e-14	2.63745	0.003189	0.917351	0.0011327	0.0111585	6.18e-05	0.000621	1.97e-05	0.0001301	1.64e-05	98.5463	2.83025	0.0077893	65.9083	0.17575
36847-27	430PRC	4a	6	1.59885e-14	2.02363	0.0027659	0.708969	0.0009876	0.0085455	3.83e-05	0.0004981	1.25e-05	3.04e-05	1.62e-05	99.5716	2.83906	0.0092489	66.1095	0.208659
36847-28	430PRC	4a	6	1.10857e-14	1.40266	0.0025807	0.492327	0.0007596	0.0057612	3.63e-05	0.0002954	1.18e-05	7.03e-06	1.55e-05	99.8667	2.84219	0.0120328	66.1813	0.271456
36847-29	430PRC	4a	6	1.90632e-14	2.4121	0.0033422	0.845691	0.0011327	0.0101739	6.57e-05	0.0005375	1.35e-05	2.15e-05	1.64e-05	99.7516	2.84209	0.0084596	66.1789	0.190846
36847-30	430PRC	4a	6	1.57131e-14	1.9888	0.0027019	0.69265	0.0008823	0.0082906	6.08e-05	0.0004531	1.16e-05	8.01e-05	1.64e-05	98.8149	2.83422	0.0092927	65.9991	0.209662
36847-31	430PRC	4a	6	2.44265e-14	3.09199	0.0035	1.07977	0.0011327	0.0130504	7.76e-05	0.0007773	1.52e-05	4.77e-05	1.64e-05	99.5601	2.84792	0.0068634	66.3123	0.154824
36847-32	430PRC	4a	6	2.05646e-14	2.60313	0.0035	0.9101	0.00123	0.0108143	4.41e-05	0.000632	1.35e-05	6.86e-05	1.62e-05	99.2322	2.83527	0.0081021	66.023	0.182797
36847-33	430PRC	4a	6	2.23798e-14	2.83292	0.0035	0.988305	0.00123	0.0118734	4.9e-05	0.0006788	1.44e-05	9.59e-05	1.7e-05	99.0085	2.83498	0.0076955	66.0165	0.173623
36847-34	430PRC	4a	6	1.6625e-14	2.10444	0.0027019	0.729751	0.0010358	0.00893	5.09e-05	0.0004608	1.18e-05	0.0001151	1.63e-05	98.385	2.83416	0.0091105	65.9976	0.205549
36847-35	430PRC	4a	6	1.66666e-14	2.10977	0.0027019	0.734862	0.000978	0.0088278	6.08e-05	0.000501	1.25e-05	7.85e-05	1.62e-05	98.9078	2.83657	0.0088828	66.0528	0.200407
36847-36	430PRC	4a	6	1.20651e-14	1.52719	0.0025807	0.533179	0.0010069	0.006442	3.44e-05	0.0003486	1.19e-05	5.96e-05	1.57e-05	98.8543	2.82845	0.0118025	65.867	0.266307
36847-37	430PRC	4a	6	1.80194e-14	2.28096	0.002832	0.795442	0.0011327	0.0095306	6.08e-05	0.0006239	1.24e-05	9.06e-05	1.63e-05	98.8359	2.83111	0.0086244	65.9278	0.194591
36847-38	430PRC	4a	6	1.58852e-14	2.01076	0.0027019	0.706267	0.0010165	0.0083986	5.29e-05	0.0004414	1.18e-05	2.57e-05	1.59e-05	99.6352	2.83358	0.0091794	65.9844	0.207107
36847-39	430PRC	4a	6	1.34522e-14	1.70275	0.0025807	0.594382	0.000978	0.0071187	5.78e-05	0.0004671	1.61e-05	3.54e-05	1.6e-05	99.4009	2.84453	0.0106846	66.2347	0.241034
36847-40	430PRC	4a	6	2.36823e-14	2.99775	0.0035805	1.05758	0.00123	0.0126834	4.7e-05	0.0006318	1.27e-05	3.47e-05	1.7e-05	99.6715	2.82218	0.0072489	65.7237	0.163573
36847-41	430PRC	4a	6	1.47096e-14	1.86191	0.0025239	0.643456	0.0009205	0.007591	3.92e-05	0.0004795	1.78e-05	0.0001202	1.64e-05	98.0931	2.83538	0.0099235	66.0255	0.223889
36847-42	430PRC	4a	6	1.20394e-14	1.52398	0.0026401	0.53564	0.0008349	0.006296	3.44e-05	0.0002999	1.17e-05	4.23e-06	1.57e-05	99.9328	2.84017	0.01138	66.135	0.256736
36847-43	430PRC	4a	6	1.56805e-14	1.985	0.0027019	0.693535	0.0010069	0.0083823	5.68e-05	0.0004468	1.17e-05	1.55e-05	1.57e-05	99.7852	2.85292	0.0092791	66.4265	0.209305
36847-44	430PRC	4a	6	1.84173e-14	2.33155	0.0030414	0.800867	0.0011327	0.0096515	6.28e-05	0.0005889	1.35e-05	0.0001961	1.7e-05	97.509	2.83571	0.0089281	66.0332	0.201431
36847-45	430PRC	4b	6	1.36046e-14	1.72227	0.0015789	0.604485	0.0008932	0.0072361	4.6e-05	0.0003483	1.22e-05	4.16e-05	1.22e-05	99.2946	2.826	0.0082378	65.811	0.18588
36847-46	430PRC	4b	6	1.42836e-14	1.80818	0.0017587	0.627407	0.0009131	0.0074919	3.53e-05	0.0004822	1.24e-05	8.64e-05	1.24e-05	98.5956	2.83846	0.0082231	66.0959	0.185518
36847-47	430PRC	4b	6	4.5616e-15	0.577483	0.0013202	0.194948	0.0003677	0.0023681	2.58e-05	0.0001815	9.92975e-06	7.04e-05	1.19e-05	96.3869	2.85216	0.0204809	66.4093	0.461983
36847-48	430PRC	4b	6	1.36938e-14	1.7335	0.0015789	0.608992	0.0008732	0.0071637	3.72e-05	0.0003962	1.21e-05	7.25e-05	1.27e-05	98.7699	2.80845	0.0083209	65.4096	0.187796
36847-50	430PRC	4b	6	4.47197e-15	0.566117	0.0011666	0.197027	0.0003482	0.0023919	3.62e-05	0.0001199	9.92975e-06	4.31e-05	1.11e-05	97.7426	2.8054	0.0188133	65.3399	0.424616
36847-52	430PRC	4b	6	1.12793e-14	1.42812	0.0015789	0.499408	0.0009031	0.0058868	3.34e-05	0.0003508	1.45e-05	5.04e-05	1.19e-05	98.9666	2.82701	0.0097543	65.8342	0.220094
36847-53	430PRC	4b	6	1.69487e-14	2.14613	0.0020354	0.752666	0.0008732	0.0092061	6.67e-05	0.0005467	1.29e-05	4.66e-05	1.18e-05	99.3731	2.83043	0.0068554	65.9123	0.154679
36847-02	430PRC	4a	6	1.63925e-14	2.07508	0.0027019	0.723103	0.0010165	0.0088056	5.68e-05	0.0005339	1.35e-05	3.03e-05	1.6e-05	99.5849	2.85474	0.0090516	66.4683	0.204169
36847-10	430PRC	4a	6	2.19474e-14	2.77764	0.0035	0.971832	0.0011327	0.0115251	4.8e-05	0.0008889	1.44e-05	-7.59e-06	1.62e-05	100.106	2.85815	0.0074861	66.5462	0.168851
36847-11	430PRC	4a	6	9.97231e-15	1.26188	0.0026401	0.438657	0.000816	0.0052103	3.25e-05	0.000324	1.61e-05	2.7e-05	1.55e-05	99.3812	2.85587	0.0136882	66.4939	0.308748
36847-13	430PRC	4a	6	1.03704e-14	1.31272	0.0025239	0.451063	0.000816	0.0054022	3.83e-05	0.000415	1.61e-05	7.86e-05	1.58e-05	98.2379	2.85597	0.013364	66.4962	0.301435
36847-19	430PRC	4a	6	1.313e-14	1.6622	0.0025807	0.566842	0.0009876	0.0068524	5.78e-05	0.000472	1.27e-05	0.0001255	1.57e-05	97.7684	2.86391	0.0111432	66.6778	0.251319
36847-22	430PRC	4a	6	1.49609e-14	1.89405	0.0027659	0.660381	0.0010165	0.0079348	5.68e-05	0.000522	1.61e-05	9.55e-06	1.54e-05	99.8714	2.86137	0.0096815	66.6198	0.218359
36847-49	430PRC	4b	6	1.33401e-14	1.68874	0.0015789	0.59005	0.0008533	0.0072115	4.6e-05	0.0004164	1.22e-05	-4.42e-06	1.23e-05	100.099	2.86177	0.0083639	66.6289	0.18864
36847-51	430PRC	4b	6	1.58813e-14	2.01038	0.0017587	0.701611	0.0010028	0.0083749	5.78e-05	0.001252	2.16e-05	2.22e-05	1.23e-05	99.7218	2.85435	0.0075957	66.4592	0.171331
Weighted Mean																2.83665	0.00136228	66.0547	0.0356741
Sample HF14-1			J = 0.013202E-02 ± 3.19010E-06
37004-01	443PRA	14c	6	1.39005e-14	1.76109	0.0014616	0.619775	0.0004928	0.0073772	5.44e-05	0.0003694	1.86e-05	3.49e-05	1.39e-05	99.4294	2.82203	0.0077267	66.1367	0.177718
37004-02	443PRA	14c	6	1.62426e-14	2.05775	0.0018484	0.725917	0.0005624	0.0086666	6.79e-05	0.0003516	2.5e-05	3.92e-05	1.39e-05	99.4481	2.8158	0.0069754	65.9933	0.16045
37004-03	443PRA	14c	6	1.71216e-14	2.16906	0.0016542	0.764203	0.0005624	0.0090662	6.4e-05	0.0003333	2.58e-05	3.45e-05	1.38e-05	99.5405	2.82203	0.0065119	66.1366	0.149777
37004-04	443PRA	14c	6	1.17334e-14	1.48638	0.0013662	0.52386	0.0004729	0.0062947	5.35e-05	0.0002732	1.8e-05	1.39e-05	1.37e-05	99.74	2.82673	0.0088958	66.2447	0.204595
37004-05	443PRA	14c	6	9.71119e-15	1.2305	0.0012714	0.43139	0.0004431	0.0053647	4.49e-05	0.0002117	2.42e-05	8.61e-05	1.37e-05	97.928	2.7901	0.010605	65.4016	0.244019
37004-07	443PRA	14c	6	1.55797e-14	1.97391	0.0016542	0.690788	0.0005425	0.0083023	5.63e-05	0.0003793	2.58e-05	4.42e-05	1.37e-05	99.3504	2.83564	0.0070802	66.4498	0.162821
37004-08	443PRA	14c	6	1.77633e-14	2.25021	0.0019459	0.79253	0.0006122	0.009527	5.73e-05	0.0004496	1.98e-05	6.29e-05	1.41e-05	99.1857	2.8129	0.0066138	65.9265	0.15214
37004-09	443PRA	14c	6	2.59991e-14	3.29375	0.0027325	1.16646	0.0007019	0.0138022	7.18e-05	0.0006189	2.66e-05	3.49e-05	1.49e-05	99.7019	2.81204	0.0052076	65.9068	0.119792
37004-10	443PRA	14c	6	1.23288e-14	1.56177	0.0013662	0.544471	0.0004629	0.0064327	3.14e-05	0.0002472	2.34e-05	7.34e-05	1.37e-05	98.6126	2.82536	0.0085776	66.2133	0.197281
37004-11	443PRA	14c	6	2.11253e-14	2.67628	0.0022397	0.947639	0.000662	0.0113839	6.69e-05	0.0005153	2.34e-05	6.1e-05	1.41e-05	99.3384	2.80222	0.0058063	65.6808	0.133581
37004-12	443PRA	14c	6	1.28233e-14	1.6246	0.0014616	0.569737	0.0005126	0.0067625	5.25e-05	0.0003352	1.98e-05	4.65e-05	1.39e-05	99.1658	2.82444	0.0084338	66.192	0.193975
37004-13	443PRA	14c	6	9.40389e-15	1.19135	0.0013662	0.417753	0.0004133	0.0049297	2.88e-05	0.0002021	2.19e-05	2.85e-05	1.33e-05	99.3016	2.82862	0.010694	66.2882	0.245947
37004-14	443PRA	14c	6	1.24604e-14	1.57863	0.0016542	0.55543	0.0004928	0.006775	6.11e-05	0.0002771	1.92e-05	1.58e-05	1.35e-05	99.72	2.83094	0.008505	66.3416	0.195598
37004-15	443PRA	14c	6	2.04268e-14	2.58796	0.0026337	0.9118	0.0006222	0.0110512	5.92e-05	0.0005405	2.5e-05	6.85e-05	1.41e-05	99.2312	2.81321	0.0061831	65.9337	0.14223
37004-16	443PRA	14c	6	6.89283e-15	0.873302	0.0007161	0.305913	0.0003538	0.0036229	3.05e-05	0.0001359	2.19e-05	2.36e-05	1.36e-05	99.2074	2.82884	0.0140303	66.2932	0.322677
37004-17	443PRA	14c	6	2.69703e-14	3.41602	0.0029303	1.18859	0.000682	0.0142804	6.5e-05	0.0005462	3e-05	0.00024	1.49e-05	97.918	2.81091	0.0052421	65.8808	0.120589
37004-18	443PRA	14c	6	2.18536e-14	2.76803	0.002338	0.975601	0.000662	0.011571	4.87e-05	0.000503	2.5e-05	4.68e-05	1.41e-05	99.5137	2.82019	0.0057078	66.0942	0.131284
37004-19	443PRA	14c	6	1.50614e-14	1.90781	0.0018484	0.66795	0.0005126	0.0080638	6.11e-05	0.0004781	2.05e-05	8.14e-05	1.39e-05	98.7514	2.81729	0.0074575	66.0276	0.171537
37004-20	443PRA	14c	6	1.46013e-14	1.84951	0.0016542	0.649439	0.0005126	0.0077321	6.6e-05	0.0004813	2.75e-05	3.05e-05	1.4e-05	99.534	2.83131	0.0075839	66.3502	0.174413
37004-21	443PRA	12a	6	8.96363e-15	1.13543	0.0011606	0.399542	0.0004285	0.004723	2.96e-05	0.0001481	1.77e-05	2.83e-05	1.64e-05	99.2729	2.81756	0.0133344	66.0336	0.306716
37004-22	443PRA	12a	6	1.54049e-14	1.9515	0.001545	0.68557	0.0005368	0.0081737	4.99e-05	0.0002639	1.52e-05	1.98e-05	1.69e-05	99.7168	2.83486	0.0086069	66.4318	0.19793
37004-23	443PRA	12a	6	1.44145e-14	1.82581	0.0016422	0.642676	0.0005763	0.0076678	5.48e-05	0.000246	1.56e-05	3.17e-05	1.71e-05	99.501	2.82317	0.0092771	66.1629	0.213374
37004-24	443PRA	12a	6	1.95817e-14	2.48033	0.0024284	0.871779	0.0006555	0.0103947	6.77e-05	0.0003423	1.55e-05	4.99e-05	1.78e-05	99.4186	2.82499	0.0077233	66.2047	0.177632
37004-25	443PRA	12a	6	1.31685e-14	1.66821	0.0014481	0.585361	0.000517	0.0070514	6.18e-05	0.0001811	1.7e-05	3.93e-05	1.72e-05	99.3126	2.82667	0.0099767	66.2435	0.229456
37004-26	443PRA	12a	6	2.05991e-14	2.60957	0.0027252	0.91758	0.0005961	0.011009	5.98e-05	0.0004536	1.7e-05	6.64e-05	1.69e-05	99.2647	2.81946	0.0072654	66.0775	0.167112
37004-27	443PRA	12a	6	1.47324e-14	1.86641	0.001545	0.657193	0.0004776	0.0077299	3.44e-05	0.0002428	1.63e-05	3.18e-05	1.7e-05	99.5087	2.82241	0.0089128	66.1453	0.204997
37004-28	443PRA	12a	6	1.42651e-14	1.80685	0.001545	0.636062	0.0005368	0.0076704	6.57e-05	0.0002214	1.56e-05	4.17e-05	1.66e-05	99.3293	2.81803	0.0090702	66.0445	0.208629
37004-29	443PRA	12a	6	1.71426e-14	2.17133	0.0018376	0.765737	0.0005664	0.0091836	5.88e-05	0.0003116	1.84e-05	5.71e-05	1.7e-05	99.2358	2.81034	0.0079939	65.8675	0.18389
37004-30	443PRA	12a	6	1.94099e-14	2.45882	0.0024284	0.867268	0.0006357	0.0104868	6.37e-05	0.0003713	1.63e-05	3.76e-05	1.72e-05	99.5648	2.81919	0.0075656	66.0713	0.174019
37004-31	443PRA	12a	6	1.22799e-14	1.5557	0.0014481	0.544176	0.0005269	0.0065804	5.48e-05	0.000211	1.56e-05	3.19e-05	1.66e-05	99.4066	2.83821	0.0103846	66.509	0.238802
37004-32	443PRA	12a	6	1.86579e-14	2.3636	0.0020339	0.834106	0.0006258	0.0102139	5.48e-05	0.0002781	2.16e-05	4.26e-05	1.66e-05	99.4792	2.81532	0.0074708	65.9822	0.171847
37004-33	443PRA	12b	6	1.81856e-14	2.30386	0.0022496	0.814337	0.0006632	0.0098322	5.65e-05	0.0003018	1.47e-05	4.07e-05	1.34e-05	99.4914	2.81113	0.0068775	65.8858	0.158209
37004-34	443PRA	12b	6	2.17783e-14	2.7587	0.0026421	0.966681	0.000703	0.0115203	6.53e-05	0.0003926	1.56e-05	6.39e-05	1.41e-05	99.3286	2.831	0.0063943	66.3431	0.147054
37004-35	443PRA	12b	6	1.59406e-14	2.01916	0.0016676	0.709236	0.000524	0.0083872	3.73e-05	0.0002143	2.11e-05	3.45e-05	1.4e-05	99.5041	2.82919	0.0073876	66.3014	0.169902
37004-36	443PRA	12b	6	1.4591e-14	1.84809	0.0015719	0.65096	0.0005042	0.00772	3.92e-05	0.0002701	2.2e-05	6.65e-05	1.32e-05	98.9465	2.80551	0.0075722	65.7565	0.174201
37004-37	443PRA	12b	6	1.53839e-14	1.94881	0.0015719	0.684657	0.0005141	0.0081929	6.14e-05	0.0002865	1.49e-05	2.44e-05	1.37e-05	99.6471	2.83273	0.0074459	66.3828	0.171236
37004-39	443PRA	12b	6	5.97602e-15	0.75694	0.0011049	0.265525	0.0003265	0.0031512	3e-05	0.0001101	1.45e-05	3.82e-05	1.28e-05	98.512	2.80471	0.0157467	65.7381	0.362263
37004-40	443PRA	12b	6	1.61746e-14	2.04882	0.0016676	0.719966	0.0005439	0.0087157	6.33e-05	0.0002441	2.28e-05	4.84e-05	1.36e-05	99.3114	2.82249	0.0071889	66.1472	0.165348
37004-41	443PRA	13	6	1.95509e-14	2.47771	0.0024131	0.868116	0.0006235	0.0103689	7e-05	0.000251	1.41e-05	6.77e-05	1.38e-05	99.2095	2.82739	0.0066186	66.2599	0.15222
37004-42	443PRA	13	6	1.1505e-14	1.45846	0.0015789	0.509726	0.0004548	0.006223	5.14e-05	0.0002373	1.32e-05	6.77e-05	1.29e-05	98.654	2.81859	0.0091282	66.0576	0.209963
37004-43	443PRA	13	6	9.94491e-15	1.26035	0.0014909	0.437849	0.0004252	0.0051722	2.95e-05	0.000109	1.3e-05	9.44e-05	1.29e-05	97.7853	2.8106	0.0103367	65.8737	0.237784
37004-44	443PRA	13	6	9.37261e-15	1.1876	0.0014909	0.413402	0.0003955	0.0050557	5.53e-05	9.11e-05	1.21e-05	7.52e-05	1.3e-05	98.1301	2.81489	0.0109099	65.9722	0.250955
37004-45	443PRA	13	6	2.25929e-14	2.8626	0.0027969	0.985922	0.0006434	0.0119068	7e-05	0.0002805	1.38e-05	0.0002658	1.49e-05	97.2511	2.81951	0.0065167	66.0787	0.149892
37004-46	443PRA	13	6	1.01351e-14	1.28417	0.0014909	0.449945	0.0004746	0.0054344	5.53e-05	0.0001093	1.2e-05	2.92e-05	1.31e-05	99.3436	2.83114	0.0099982	66.3464	0.229937
37004-47	443PRA	13	6	1.89585e-14	2.40252	0.0022233	0.844561	0.0005738	0.0101776	6.41e-05	0.0002034	1.31e-05	7.1e-05	1.38e-05	99.1389	2.81603	0.0062188	65.9986	0.143046
37004-48	443PRA	13	6	2.84616e-14	3.60617	0.0022233	1.27725	0.0008825	0.0150147	5.04e-05	0.000247	1.89e-05	5.4e-05	1.41e-05	99.5693	2.80708	0.0046303	65.7925	0.106519
37004-49	443PRA	13	6	1.7085e-14	2.1648	0.0018501	0.761742	0.0005242	0.0092187	5.92e-05	0.0001532	1.19e-05	6.41e-05	1.36e-05	99.1334	2.81312	0.0064967	65.9315	0.149445
37004-50	443PRA	13	6	2.69491e-14	3.41416	0.0031848	1.2038	0.0007131	0.0145977	7e-05	0.0002048	1.97e-05	4.15e-05	1.41e-05	99.6528	2.82212	0.0051116	66.1387	0.117568
37004-51	443PRA	14a	6	5.81684e-15	0.737363	0.0011693	0.259147	0.0002986	0.0030979	2.36e-05	0.0001112	1.35e-05	5.15e-05	1.56e-05	97.9618	2.78305	0.0189641	65.2394	0.436401
37004-52	443PRA	14a	6	1.02519e-14	1.29953	0.0014258	0.455327	0.0004457	0.0054676	3.41e-05	4.67e-05	1.26e-05	4.63e-05	1.6e-05	98.9477	2.81963	0.0114857	66.0814	0.264186
37004-53	443PRA	14a	6	1.6413e-14	2.08051	0.0017756	0.73195	0.0005645	0.0087626	6.65e-05	0.0001335	9.98098e-06	3.9e-05	1.66e-05	99.4602	2.82268	0.0078019	66.1516	0.179446
37004-54	443PRA	14a	6	2.20628e-14	2.79677	0.0026159	0.982841	0.0007036	0.011765	7.05e-05	0.0002279	9.5901e-06	5.84e-05	1.68e-05	99.4014	2.82417	0.0064446	66.1859	0.148226
37004-55	443PRA	14a	6	1.52628e-14	1.93487	0.0016861	0.679746	0.0005645	0.0081925	6.16e-05	8.77e-05	1.35e-05	4.43e-05	1.69e-05	99.3301	2.823	0.0084121	66.159	0.19348
37004-56	443PRA	14a	6	1.33342e-14	1.69025	0.0015109	0.591887	0.0004753	0.0070067	3.7e-05	0.0001346	1.26e-05	3.97e-05	1.64e-05	99.3227	2.83195	0.0091998	66.3648	0.211573
37004-58	443PRA	14a	6	1.17566e-14	1.49033	0.0015109	0.523876	0.0004457	0.0062837	4.78e-05	7.95e-05	9.1351e-06	4.11e-05	1.62e-05	99.1928	2.81745	0.0101979	66.0313	0.23457
37004-06	443PRA	14c	6	1.34516e-15	0.170426	0.0007489	0.0589867	8.8e-05	0.0007513	2.06e-05	0.0088809	6.28e-05	3.58e-05	1.27e-05	98.9218	2.85852	0.0657787	66.9762	1.51224
37004-38	443PRA	12b	6	1.28927e-15	0.163281	0.0007701	0.0569961	0.0001278	0.0007007	1.84e-05	0.0065454	5.41e-05	5.02e-05	1.25e-05	96.5689	2.76689	0.0676492	64.8673	1.55706
37004-57	443PRA	14a	6	1.25288e-15	0.158818	0.0009236	0.0547497	0.0001309	0.000671	1.55e-05	0.0024141	1.81e-05	5.55e-05	1.57e-05	94.2294	2.73237	0.0877034	64.072	2.01953
37004-60	443PRA	14a	6	1.09772e-14	1.39155	0.0015978	0.48956	0.0004654	0.0058597	4.58e-05	0.0001097	8.91403e-06	3.24e-05	1.63e-05	99.33	2.81901	0.0110309	66.0672	0.253727
Weighted Mean																2.8192	0.0010169	66.0718	0.0279672
J = 0.013231E-02 ± 5.69302E-06
37012-01	443PRB	11a	6	1.92167e-14	2.43399	0.0022013	0.862171	0.0006233	0.0103012	6.45e-05	0.0004311	2.55e-05	4.72e-05	1.8e-05	99.4382	2.80403	0.0073552	65.8637	0.169213
37012-02	443PRB	11a	6	2.00848e-14	2.54402	0.0022969	0.896211	0.0006133	0.0108972	6.16e-05	0.0005487	2.27e-05	3.24e-05	1.8e-05	99.6411	2.82522	0.0071156	66.3524	0.163656
37012-03	443PRB	11a	6	1.2119e-14	1.53518	0.0013695	0.540364	0.0004743	0.0064394	5.19e-05	0.0002917	2.78e-05	4.25e-05	1.79e-05	99.191	2.81481	0.0107043	66.1125	0.246226
37012-04	443PRB	11a	6	9.51535e-15	1.20538	0.0013695	0.423036	0.0004248	0.0051083	4.62e-05	0.0001665	2.4e-05	5.12e-05	1.73e-05	98.746	2.81041	0.0131693	66.011	0.302945
37012-05	443PRB	11a	6	9.49819e-15	1.20315	0.0013695	0.424757	0.0004545	0.0051939	4.62e-05	0.000249	1.97e-05	2.62e-05	1.76e-05	99.3712	2.81153	0.0133582	66.0368	0.307287
37012-06	443PRB	11a	6	1.16504e-14	1.47583	0.0016388	0.520318	0.0004743	0.0061706	3.58e-05	0.0002233	2.7e-05	2.38e-05	1.76e-05	99.5319	2.81989	0.0111089	66.2296	0.255518
37012-07	443PRB	11a	6	2.74789e-14	3.48107	0.0026825	1.23071	0.000673	0.0148874	7.53e-05	0.0007834	2.48e-05	7.33e-05	1.86e-05	99.3935	2.80813	0.005632	65.9584	0.129561
37012-08	443PRB	11a	6	2.11959e-14	2.68526	0.0022969	0.942987	0.000693	0.0111607	4.81e-05	0.0004725	2.7e-05	9.45e-05	1.86e-05	98.9659	2.81494	0.0070372	66.1153	0.161875
37012-09	443PRB	11a	6	1.79701e-14	2.27632	0.0020114	0.803504	0.0006034	0.0098513	6.06e-05	0.0003669	2.86e-05	4.11e-05	1.86e-05	99.4773	2.81495	0.0079378	66.1157	0.182591
37012-10	443PRB	14c	6	1.86639e-14	2.36448	0.0020436	0.835441	0.0006222	0.0099864	6.69e-05	0.0005464	1.98e-05	3.13e-05	1.37e-05	99.6273	2.81644	0.0062378	66.1499	0.143483
37012-11	443PRB	14c	6	1.3234e-14	1.67651	0.0014616	0.589585	0.0005226	0.0070952	5.35e-05	0.0002848	2.42e-05	3.27e-05	1.38e-05	99.4345	2.82422	0.0081155	66.3294	0.186654
37012-12	443PRB	14c	6	1.92984e-14	2.4451	0.002338	0.864731	0.0006222	0.0103642	7.28e-05	0.0004369	2.5e-05	4.68e-05	1.49e-05	99.4456	2.80869	0.0065073	65.9711	0.149696
37012-13	443PRB	14c	6	3.58696e-14	4.54364	0.0035251	1.6017	0.0008915	0.0193502	9.24e-05	0.0009354	2.92e-05	5.83e-05	1.56e-05	99.6372	2.82322	0.0044772	66.3062	0.102975
37012-14	443PRB	14c	6	1.7669e-14	2.23826	0.0018484	0.792094	0.0005525	0.009432	6.21e-05	0.0004544	1.98e-05	5.34e-05	1.41e-05	99.3074	2.80295	0.0064889	65.8389	0.149284
37012-15	443PRB	14c	6	9.15616e-15	1.1598	0.0013662	0.408056	0.0004133	0.0048401	3.05e-05	0.0002524	2.27e-05	4.08e-05	1.39e-05	98.9707	2.80978	0.0112908	65.9964	0.259735
37012-16	443PRB	14c	6	1.89301e-14	2.39813	0.0020436	0.851286	0.0005923	0.0102859	6.89e-05	0.0004524	1.92e-05	5.55e-05	1.41e-05	99.3274	2.79491	0.006211	65.6533	0.142905
37012-17	443PRB	14c	6	1.99114e-14	2.52242	0.002338	0.89206	0.0006122	0.010743	6.6e-05	0.0005158	1.98e-05	5.01e-05	1.49e-05	99.4269	2.8082	0.006315	65.96	0.145275
37012-18	443PRB	14c	6	2.44079e-14	3.09218	0.0032274	1.08846	0.0005923	0.0130934	6.69e-05	0.0005817	2.92e-05	0.0001022	1.49e-05	99.0315	2.81012	0.0057024	66.0041	0.131178
37012-19	443PRB	14c	6	1.8713e-14	2.37076	0.0022397	0.838399	0.0005724	0.0098713	6.21e-05	0.0004723	1.92e-05	3.88e-05	1.41e-05	99.5305	2.81121	0.0063816	66.0293	0.146799
37012-20	443PRB	14c	6	1.30809e-14	1.6573	0.0013662	0.583779	0.0005126	0.0068744	3.49e-05	0.0002941	2.66e-05	5.29e-05	1.41e-05	99.0649	2.80914	0.0082776	65.9816	0.190419
Weighted Mean																2.81216	0.00157935	66.0515	0.0455816
Sample HF15-1			J = 0.013092 ± 6.14916E-06
37108-01	456PRA	16a	6	1.34353e-14	1.70236	0.0019416	0.592989	0.0005962	0.0071461	5.46e-05	0.0003678	1.08e-05	1.3e-05	1.4e-05	99.7895	2.86165	0.0089229	66.4961	0.201764
37108-02	456PRA	16a	6	1.589e-14	2.01345	0.0017029	0.707655	0.0006054	0.0084729	5.65e-05	0.0004493	1.09e-05	2.31e-05	1.4e-05	99.6755	2.83292	0.0075376	65.8404	0.170501
37108-03	456PRA	16a	6	1.0333e-14	1.30938	0.0016279	0.458381	0.0004701	0.0053644	3.73e-05	0.0002705	1.01e-05	2.48e-05	1.33e-05	99.4504	2.83774	0.0103691	65.9504	0.234534
37108-04	456PRA	16a	6	1.03843e-14	1.31588	0.0017029	0.45935	0.0004965	0.0053488	2.82e-05	0.000357	1.07e-05	1.58e-05	1.31e-05	99.6642	2.85193	0.0103575	66.2742	0.23423
37108-05	456PRA	16a	6	1.02827e-14	1.30298	0.0016279	0.443558	0.0004528	0.0052521	3.27e-05	0.0002728	9.92975e-06	0.00012	1.37e-05	97.2667	2.85419	0.0109736	66.3257	0.248157
37108-06	456PRA	16a	6	1.74236e-14	2.20797	0.0024597	0.775584	0.0006519	0.0091218	6.53e-05	0.0005323	1.22e-05	3.63e-05	1.38e-05	99.5295	2.83037	0.0073909	65.7821	0.167186
37108-07	456PRA	16a	6	1.17563e-14	1.48986	0.0017804	0.514328	0.0005143	0.0060525	4.3e-05	0.0003386	1.07e-05	8.07e-05	1.4e-05	98.4013	2.84731	0.0099064	66.1689	0.224041
37108-08	456PRA	16a	6	8.05598e-15	1.02094	0.0016279	0.356135	0.0004614	0.0041821	4.59e-05	0.0002291	1.05e-05	2.58e-05	1.33e-05	99.2643	2.84255	0.0130949	66.0602	0.296171
37108-09	456PRA	16a	6	1.14569e-14	1.45173	0.0017029	0.507869	0.0005054	0.0061052	5.46e-05	0.000415	1.12e-05	3.66e-05	1.36e-05	99.2714	2.83456	0.009703	65.8777	0.219478
37108-10	456PRA	16a	6	1.46603e-14	1.85763	0.0019416	0.65033	0.0005778	0.0077564	5.94e-05	0.0003929	1.15e-05	3.31e-05	1.36e-05	99.4864	2.83867	0.0080575	65.9715	0.182246
Weighted Mean																2.84162	0.00291805	66.0391	0.0726296
J = 0.013057 ± 4.50031E-06
37118-01	456PRB	17	6	1.03887e-14	1.31664	0.0019105	0.457191	0.0004494	0.0055194	4.75e-05	0.0003559	1.29e-05	4.39e-05	1.29e-05	99.0435	2.84867	0.0107457	66.0257	0.242581
37118-02	456PRB	17	6	9.41278e-15	1.19296	0.0018385	0.415319	0.0004494	0.0050019	4.85e-05	0.0001625	8.5e-06	4.44e-05	1.22e-05	98.9092	2.83743	0.0112204	65.7699	0.253333
37118-03	456PRB	17	6	8.58044e-15	1.08744	0.0017692	0.374922	0.0004401	0.0045584	4.08e-05	0.0002105	9.00278e-06	4.01e-05	1.28e-05	98.9261	2.86565	0.0125742	66.4121	0.2838
37118-04	456PRB	17	6	8.60251e-15	1.08998	0.0018385	0.378999	0.0004588	0.0044798	2.86e-05	0.0001614	8.93756e-06	1.45e-05	1.26e-05	99.6244	2.86149	0.0124126	66.3174	0.280167
37118-05	456PRB	17	6	1.28134e-14	1.62347	0.0018385	0.559576	0.0005345	0.0066263	4.66e-05	0.0002541	1.15e-05	6.2e-05	1.27e-05	98.8822	2.86516	0.0091593	66.401	0.206726
Weighted Mean																2.85588	0.0049184	66.1899	0.113103
Sample TR13-2			J = 0.013140E-02 ± 3.15176E-06
36850-01	430PRC	3b	6	1.38236e-15	0.174994	0.0020248	0.0618215	0.0002343	0.0007864	2.22e-05	0.0001296	1.47e-05	-5.6e-06	1.34e-05	101.009	2.85628	0.0742897	66.6147	1.67993
36850-02	430PRC	3b	6	8.82201e-16	0.111669	0.0018273	0.0398277	0.0001803	0.0005025	2.22e-05	0.0001138	1.39e-05	4.68e-06	1.31e-05	98.8212	2.76794	0.110115	64.5908	2.4928
36850-04	430PRC	3b	6	1.37571e-15	0.174209	0.0018874	0.0602539	0.0002421	0.0007127	1.91e-05	9.6e-05	1.47e-05	2.03e-05	1.3e-05	96.5517	2.78871	0.0732355	65.0668	1.65749
36850-05	430PRC	3b	6	1.41456e-15	0.179033	0.0018165	0.0609047	0.00025	0.0006982	1.91e-05	0.0001409	1.2e-05	-9.4e-06	1.56e-05	101.623	2.98424	0.0834262	69.5424	1.88351
36850-06	430PRC	3b	6	1.67463e-15	0.21192	0.0018423	0.0719704	0.0002746	0.000836	1.77e-05	0.0001427	1.39e-05	2.14e-05	1.31e-05	97.037	2.85441	0.0618983	66.5718	1.39975
36850-07	430PRC	3b	6	1.72018e-15	0.217724	0.0017299	0.0743946	0.0002663	0.0008939	1.91e-05	0.0002342	1.54e-05	1.87e-05	1.33e-05	97.513	2.85094	0.0595413	66.4925	1.34651
36850-08	430PRC	3b	6	3.57537e-15	0.452587	0.0018962	0.158892	0.0003354	0.0019671	3.27e-05	0.0001132	1.14e-05	1.68e-05	1.36e-05	98.9135	2.81453	0.029229	65.6585	0.661306
36850-09	430PRC	3b	6	2.73007e-15	0.345572	0.0019007	0.119641	0.0003444	0.0014504	2.82e-05	9.23e-05	1.14e-05	1.49e-05	1.34e-05	98.7362	2.84897	0.0383438	66.4473	0.867154
36850-10	430PRC	3b	6	6.78198e-16	0.0858456	0.001772	0.0290703	0.0002663	0.0003598	1.6e-05	2.31e-05	1.07e-05	2.42e-05	1.29e-05	91.5909	2.70194	0.14967	63.0773	3.39106
36850-13	430PRC	3b	6	1.52615e-15	0.193208	0.0018423	0.0641438	0.0002663	0.0007683	1.84e-05	1.11433e-07	1.07e-05	5.54e-06	1.29e-05	99.1439	2.98325	0.0683724	69.5196	1.54366
36850-14	430PRC	3b	6	2.78758e-15	0.352905	0.0017535	0.124759	0.0003176	0.0014152	2.91e-05	9.37e-05	1.14e-05	1.36e-05	1.33e-05	98.8664	2.79371	0.0358427	65.1814	0.811154
36850-15	430PRC	3b	6	1.5056e-15	0.19059	0.0017868	0.0671678	0.0002581	0.0007819	1.77e-05	5.95e-05	1.34e-05	2.55e-06	1.28e-05	99.6227	2.82388	0.0645242	65.8726	1.45969
36850-16	430PRC	4b	6	1.35585e-15	0.171634	0.0017299	0.0597435	0.0002421	0.000699	1.64e-05	2.29e-05	1.06e-05	1.63e-05	1.31e-05	97.1679	2.78859	0.0731283	65.064	1.65507
36850-17	430PRC	4b	6	1.01383e-15	0.128382	0.0018061	0.0448586	0.0002915	0.0005111	1.64e-05	4.24e-05	1.11e-05	-1.5e-05	1.28e-05	103.506	2.95918	0.0973575	68.9693	2.19873
36850-22	430PRC	4b	6	6.30866e-16	0.0798584	0.0008276	0.0267176	0.0001061	0.0003205	1.34e-05	4.54e-05	1e-05	1.59e-05	1.06e-05	94.1013	2.80967	0.123752	65.5472	2.80006
36850-25	430PRC	4b	6	1.05481e-15	0.133523	0.0008682	0.0452108	0.0002043	0.0005224	1.52e-05	8.1e-05	1.01e-05	1.38e-05	1.07e-05	96.9568	2.86041	0.0747185	66.7092	1.68954
36850-26	430PRC	4b	6	5.28114e-16	0.0668499	0.0008184	0.0220106	0.0001588	0.0004456	2.03e-05	7.31e-05	1e-05	1.21e-05	1.05e-05	94.7211	2.8738	0.149309	67.0157	3.3756
36850-27	430PRC	4b	6	1.18053e-15	0.149456	0.0009262	0.0519629	0.0002043	0.000599	1.52e-05	0.0001068	1.2e-05	1.73e-05	1.08e-05	96.6105	2.77573	0.0659979	64.7693	1.49393
36850-28	430PRC	4b	6	2.96505e-16	0.0375334	0.0007749	0.0130356	0.0001331	0.0001062	1.45e-05	3.37e-05	9.70979e-06	8.90002e-07	1.02e-05	99.3597	2.8578	0.243538	66.6495	5.50706
36850-29	430PRC	4b	6	8.75542e-16	0.110833	0.0008096	0.0381786	0.0001767	0.0005036	1.86e-05	2.31e-05	9.70979e-06	2.43e-05	1.04e-05	93.4591	2.71017	0.085661	63.266	1.94062
36850-30	430PRC	4b	6	1.03212e-15	0.130654	0.000823	0.0441247	0.000195	0.0005378	1.45e-05	8.91e-05	1.05e-05	8.14e-06	1.06e-05	98.1979	2.90454	0.0753624	67.7195	1.70315
36850-34	430PRC	4b	6	1.11034e-15	0.140602	0.0008523	0.0482108	0.0002043	0.000585	1.37e-05	8.53e-05	9.92975e-06	5.6e-06	1.05e-05	98.8629	2.88012	0.0688583	67.1605	1.55664
36850-35	430PRC	4b	6	4.84351e-16	0.0613096	0.0007892	0.020716	0.0001501	0.0002819	1.3e-05	3.4e-05	9.35361e-06	2.14e-05	1.06e-05	89.6026	2.64894	0.159636	61.8609	3.61929
36850-37	430PRC	4b	6	4.48436e-15	0.567609	0.0011281	0.1937	0.0003189	0.0022767	1.94e-05	0.0001159	1.03e-05	6.28e-05	1.14e-05	96.7125	2.83092	0.01936	66.0339	0.43793
36850-38	430PRC	4b	6	5.73739e-15	0.726291	0.0013202	0.248852	0.0005056	0.0030117	3.72e-05	0.0001454	1.08e-05	2.71e-05	1.14e-05	98.9017	2.88335	0.0161255	67.2344	0.364525
36850-39	430PRC	4b	6	6.07745e-16	0.0769433	0.0007892	0.0259131	0.0001501	0.0003066	1.45e-05	6.29e-05	9.8737e-06	3.31e-06	1.05e-05	98.7859	2.93007	0.126424	68.3036	2.85621
36850-40	430PRC	4b	6	2.16567e-15	0.274147	0.0009976	0.093664	0.0002706	0.0012033	2.39e-05	9.8e-05	9.81835e-06	1.97e-05	1.04e-05	97.8859	2.86192	0.0362245	66.7437	0.819092
36850-41	430PRC	4b	6	6.8148e-16	0.086265	0.0008011	0.0290563	0.0001588	0.0003725	1.37e-05	5.95e-05	9.81835e-06	4.89e-06	1.05e-05	98.369	2.91731	0.112983	68.0117	2.55296
36850-42	430PRC	4b	6	1.00246e-15	0.126929	0.000823	0.0433944	0.0001767	0.0004955	2.21e-05	2.58e-05	9.76371e-06	1.33e-06	1.03e-05	99.7038	2.91314	0.0743617	67.9161	1.68036
36850-46	430PRC	4b	6	5.64543e-15	0.71485	0.0011281	0.251068	0.0004463	0.0030572	3.91e-05	0.0001146	1.04e-05	4.28e-06	1.08e-05	99.8358	2.83941	0.014789	66.2284	0.334497
36850-48	430PRC	4b	6	6.1328e-16	0.0776364	0.0007855	0.0255843	0.0001501	0.0003169	1.32e-05	4.24e-05	1.12e-05	1.76e-05	1.06e-05	93.2982	2.8281	0.128648	65.9692	2.91017
36850-52	430PRC	4b	6	1.73304e-15	0.219377	0.0009262	0.0769483	0.0002324	0.0008931	1.69e-05	3.6e-05	1.01e-05	1.86e-05	1.06e-05	97.4804	2.77604	0.0440791	64.7765	0.997772
36850-54	430PRC	4b	6	4.68151e-16	0.0592755	0.0007971	0.0215402	0.0001111	0.0002464	1.31e-05	1.29e-05	9.76371e-06	-2.43e-06	1.02e-05	101.243	2.78293	0.14728	64.9344	3.33352
36850-55	430PRC	4b	6	9.55403e-16	0.120941	0.0008324	0.0401942	0.0001858	0.0005025	1.37e-05	6.58e-05	1.27e-05	1.87e-05	1.06e-05	95.4345	2.86842	0.0826466	66.8926	1.86862
36850-58	430PRC	4b	6	4.92658e-16	0.0623471	0.0007931	0.0200386	0.0001415	0.0002596	1.21e-05	1.43e-05	9.60416e-06	2.74e-05	1.01e-05	86.9124	2.70119	0.157849	63.06	3.57641
36850-64	430PRC	4b	6	1.30041e-15	0.164593	0.0008905	0.0558788	0.0002043	0.0007032	1.6e-05	6.58e-05	9.55249e-06	6.95e-06	1.06e-05	98.7767	2.90629	0.0602832	67.7596	1.36234
36850-65	430PRC	4b	6	1.0609e-15	0.134222	0.000823	0.0451006	0.0001203	0.0005555	1.45e-05	1.84e-05	1.13e-05	9.84e-06	1.04e-05	97.8239	2.90806	0.0722085	67.7999	1.6318
36850-66	430PRC	4b	6	1.65356e-15	0.209245	0.0009909	0.0722564	0.0002043	0.0008682	1.77e-05	0.0001678	1.03e-05	2.38e-05	1.05e-05	96.6837	2.79675	0.0465232	65.2511	1.05282
36850-67	430PRC	4b	6	1.26334e-15	0.159856	0.0010538	0.0526413	0.0001767	0.0006379	1.52e-05	1.29e-05	9.6566e-06	2.96e-05	1.09e-05	94.4817	2.86596	0.0660853	66.8363	1.49422
36850-68	430PRC	4b	6	6.02148e-16	0.0762156	0.0007855	0.0256559	0.0001677	0.0003242	1.28e-05	6.12e-05	9.8737e-06	1.79e-05	1.03e-05	93.069	2.76176	0.125013	64.4491	2.8303
36850-69	430PRC	4b	6	1.4656e-15	0.185511	0.0009449	0.0621423	0.0002706	0.0007361	1.6e-05	0.0001106	1.03e-05	3.21e-05	1.05e-05	94.8935	2.8297	0.0545182	66.006	1.23324
36850-70	430PRC	4b	6	7.81758e-16	0.0989606	0.0007819	0.0331743	0.0001126	0.0003831	1.86e-05	3.6e-05	1.14e-05	2.84e-05	1.03e-05	91.4621	2.72534	0.0960603	63.614	2.1758
36850-72	430PRC	4b	6	5.49155e-16	0.0695412	0.0007855	0.0232357	0.0001068	0.0002581	1.24e-05	2.27e-05	9.60416e-06	6.75e-06	1.03e-05	97.1297	2.90373	0.137923	67.7009	3.11701
36850-73	430PRC	4b	6	9.12557e-16	0.115488	0.0008373	0.0395998	0.0001767	0.0004603	1.52e-05	1.49e-05	9.6566e-06	1.63e-05	1.12e-05	95.791	2.79049	0.088555	65.1077	2.00416
36850-74	430PRC	4b	6	2.30185e-15	0.291237	0.0010538	0.100777	0.0002419	0.0012125	1.77e-05	5.06e-05	9.70979e-06	1.52e-05	1.1e-05	98.4578	2.84215	0.035087	66.2912	0.79357
36850-75	430PRC	4b	6	7.75705e-16	0.0981741	0.000823	0.0331631	0.0001588	0.000426	1.86e-05	4.23e-05	9.70979e-06	8.05e-06	1.03e-05	97.5934	2.88588	0.0975374	67.2924	2.20481
36850-76	430PRC	4b	6	9.06945e-16	0.114798	0.0007892	0.038841	0.0001203	0.0004685	1.29e-05	5.38e-05	9.76371e-06	9.1e-06	1.08e-05	97.6768	2.88371	0.0859692	67.2428	1.94337
36850-79	430PRC	4b	6	1.23757e-15	0.156654	0.0008576	0.0541133	0.0001858	0.0006825	2.21e-05	0.0001139	9.55249e-06	1.66e-05	1.04e-05	96.9072	2.80226	0.0608312	65.3774	1.37652
36850-80	430PRC	4b	6	8.4161e-16	0.106538	0.0008011	0.0360791	0.0001588	0.0003974	1.77e-05	7.18e-05	1.05e-05	3.86e-06	1.03e-05	98.9796	2.91953	0.0890261	68.0623	2.01157
36850-82	430PRC	4b	6	4.14497e-16	0.0524636	0.0007749	0.0175283	0.0001858	0.0002215	1.25e-05	3.43e-05	9.40213e-06	1.14e-05	1.03e-05	93.5627	2.7973	0.183323	65.2638	4.14857
36850-83	430PRC	4b	6	7.33343e-16	0.0928218	0.0007855	0.0315282	0.0001767	0.000372	1.45e-05	7.47e-05	1.03e-05	1.71e-05	1.02e-05	94.5777	2.78135	0.101331	64.8982	2.29356
36850-84	430PRC	4b	6	1.40145e-15	0.177387	0.000908	0.0608477	0.0002136	0.0007229	1.45e-05	9.98e-05	1.02e-05	1.49e-05	1.07e-05	97.5433	2.84045	0.0557969	66.2522	1.26199
36850-90	430PRC	3b	6	1.4813e-15	0.187509	0.0008792	0.0645064	0.0002043	0.0007857	2.3e-05	3.08e-05	9.40213e-06	1.24e-05	1.01e-05	98.0351	2.84649	0.0499701	66.3905	1.13012
36850-92	430PRC	3b	6	7.26315e-16	0.0919313	0.0008011	0.0311527	0.0001501	0.0003198	1.86e-05	4.71e-05	9.35361e-06	1.37e-05	1.01e-05	95.5953	2.81784	0.101793	65.7342	2.30298
36850-21	430PRC	3b	6	5.15887e-16	0.0653073	0.0007931	0.0142036	9.92e-05	0.0001549	1.77e-05	1.07e-05	9.21303e-06	2.71e-05	1.06e-05	87.5979	4.02372	0.232929	93.1508	5.19131
36850-24	430PRC	3b	6	1.46644e-15	0.185634	0.000914	0.0562408	0.000223	0.0006559	1.52e-05	3.7e-05	9.81835e-06	1.49e-05	1.02e-05	97.6192	3.21872	0.0583254	74.8948	1.31296
36850-03	430PRC	4b	6	1.65068e-15	0.208999	0.0018028	0.0472802	0.0001797	0.0005945	1.77e-05	-7.45576e-06	1.23e-05	1.2e-05	1.29e-05	98.2895	4.34074	0.0926216	100.29	2.05621
36850-11	430PRC	4b	6	2.1906e-15	0.277344	0.0017377	0.0864322	0.000283	0.0010878	2.39e-05	1.03e-05	1.05e-05	1.16e-05	1.3e-05	98.7505	3.1655	0.0509625	73.6813	1.14797
36850-12	430PRC	4b	6	2.8792e-17	0.0036456	0.0017398	0.0002555	0.000154	5.42831e-06	1.43e-05	-7.29368e-07	1.08e-05	6.56e-06	1.25e-05	46.261	6.59475	16.8062	150.253	363.03
36850-18	430PRC	4b	6	8.36773e-16	0.105947	0.001756	0.0337107	0.0002421	0.0004049	1.7e-05	2.89721e-06	1.08e-05	1.53e-05	1.31e-05	95.6895	3.00428	0.130161	70.0004	2.9379
36850-19	430PRC	4b	6	1.96857e-15	0.249198	0.0017398	0.036092	0.0001765	0.0004774	2.06e-05	6.06794e-06	1.09e-05	-2.78e-06	1.29e-05	100.336	6.92151	0.12358	157.382	2.65904
36850-20	430PRC	4b	6	2.40919e-15	0.305084	0.001742	0.103418	0.0003089	0.0012308	1.98e-05	3.36e-05	1.2e-05	-1.46e-05	1.31e-05	101.441	2.98941	0.0428083	69.6605	0.966419
36850-23	430PRC	4b	6	9.85778e-16	0.124789	0.0008276	0.0043091	0.0001242	7.27e-05	1.23e-05	0.0005655	1.71e-05	4.36e-05	1.04e-05	89.9489	26.0508	1.08343	532.258	18.9813
36850-31	430PRC	3b	6	2.10719e-15	0.26678	0.0009774	0.0537108	0.000195	0.0006578	1.45e-05	1.98e-05	9.55249e-06	1.59e-05	1.06e-05	98.227	4.87409	0.0645741	112.238	1.4242
36850-32	430PRC	4b	6	1.41224e-15	0.178781	0.0009774	0.0561433	0.000195	0.0006164	2.12e-05	9.1917e-06	9.16788e-06	1.37e-05	1.03e-05	97.7175	3.10835	0.0589538	72.3773	1.32893
36850-33	430PRC	3b	6	1.02685e-16	0.0130033	0.0007855	4.97e-05	9.13e-05	6.48e-05	2.03e-05	-3.8265e-06	1.29e-05	8.27e-05	2.16e-05	-89.9309	-235.011	466.173	#NUM!	-5319.94
36850-36	430PRC	3b	6	1.88055e-15	0.237996	0.0009708	0.0661765	0.0002136	0.0008053	1.6e-05	5.83086e-06	9.6566e-06	2.45e-05	1.07e-05	96.9309	3.48234	0.0520763	80.8936	1.16844
36850-43	430PRC	3b	6	2.31693e-15	0.293389	0.0007931	0.0484894	0.000125	0.0005835	1.45e-05	1.14e-05	9.70979e-06	-2.17e-06	1.07e-05	100.224	6.05826	0.0701301	138.485	1.52467
36850-44	430PRC	4b	6	1.10384e-17	0.0013977	0.0007783	-6.11e-05	8.08e-05	8.83301e-06	1.12e-05	-1.29e-05	1.14e-05	9.59e-06	1.03e-05	-105.622	24.1805	61.6529	498.849	1100.12
36850-45	430PRC	4b	6	2.18194e-17	0.0027628	0.0008576	3.08e-05	8.85e-05	-6.14827e-07	1.17e-05	-6.16491e-06	1.13e-05	4.82e-06	9.41541e-06	47.7124	42.6838	158.968	804.995	2397.76
36850-47	430PRC	4b	6	1.34297e-18	-3.78e-05	0.0007654	-0.0001091	8.36e-05	8.23868e-06	1.1e-05	-4.2213e-06	9.45145e-06	3.74e-06	9.84733e-06	3068.36	10.6009	29.1606	235.782	601.065
36850-49	430PRC	4b	6	2.15364e-16	0.0272625	0.0007892	0.0091211	9.36e-05	0.0001046	1.19e-05	1.35e-05	9.30591e-06	9.60001e-07	1.03e-05	98.9912	2.95555	0.351055	68.8864	7.9286
36850-50	430PRC	4b	6	8.33683e-18	0.0010553	0.0007596	-3.11e-05	8.23e-05	6.35321e-07	1.1e-05	-1.05e-05	1.11e-05	1.83e-05	9.84733e-06	-419.729	142.589	404.498	1908.47	3324.4
36850-51	430PRC	4b	6	3.60114e-17	0.0045584	0.0008276	0.0001324	9.07e-05	1.96745e-06	1.22e-05	-1.13e-05	1.1e-05	8.41e-06	9.62549e-06	44.6958	15.3689	25.1435	332.57	491.489
36850-53	430PRC	4b	6	5.49848e-17	0.0069611	0.0007415	0.0001482	8.41e-05	3.26883e-06	1.14e-05	-2.24e-05	1.02e-05	2.41e-05	1.2e-05	-3.65571	-1.71319	24.6273	-41.1656	590.737
36850-56	430PRC	4b	6	7.34651e-16	0.0929751	0.0008184	0.0535998	0.0002136	0.0006702	1.6e-05	8.78678e-06	9.40213e-06	2.01e-05	1.04e-05	93.566	1.62093	0.060713	38.1044	1.39451
36850-57	430PRC	4b	6	8.26378e-17	0.0104579	0.0009909	0.0021453	9.92e-05	3.42e-05	1.34e-05	0.0003229	3.11e-05	2.23e-06	9.84733e-06	96.4043	4.70019	1.47175	108.351	32.529
36850-59	430PRC	4b	6	3.81941e-17	0.0048346	0.0007684	0.0003889	9.79e-05	-7.07051e-06	1.31e-05	8.36161e-06	9.30591e-06	1.26e-05	1e-05	22.3836	2.78052	7.99606	64.8793	180.988
36850-60	430PRC	4b	6	1.39618e-17	0.0017673	0.0007654	5.46e-05	9.3e-05	8.30017e-07	1.11e-05	7.76435e-06	9.50158e-06	1.13e-05	1.02e-05	-89.8367	-29.1042	77.3841	-871.391	2919.46
36850-61	430PRC	4b	6	1.4209e-16	0.017987	0.0007654	0.0004179	8.28e-05	1.32188e-06	1.14e-05	-2.78383e-06	9.25905e-06	4.22e-05	1.03e-05	29.9843	12.8922	8.02241	282.942	161.141
36850-62	430PRC	4b	6	1.32033e-15	0.167134	0.0009021	0.0359224	0.0001858	0.0004702	1.77e-05	2.63199e-06	9.45145e-06	1.13e-05	1.06e-05	97.9876	4.55434	0.0949791	105.084	2.10302
36850-63	430PRC	4b	6	1.31982e-17	0.0016707	0.0007624	0.0001897	0.000104	-8.31041e-06	1.12e-05	2.11571e-06	1.03e-05	-2.22e-06	1.03e-05	139.752	12.2955	18.1703	270.778	367.417
36850-71	430PRC	4b	6	2.7085e-17	0.0034285	0.0007654	9.35e-05	9.73e-05	4.82639e-06	1.11e-05	1.9e-05	9.70979e-06	1.3e-05	1e-05	-12.5198	-4.59601	33.5427	-112.624	836.66
36850-77	430PRC	4b	6	3.39542e-17	0.004298	0.0007819	0.0001376	8.19e-05	-1.17e-05	1.08e-05	7.92632e-06	9.0802e-06	5.9e-06	1.01e-05	59.1664	18.4795	25.4993	393.031	482.192
36850-78	430PRC	4b	6	2.24878e-17	0.0028468	0.0007473	8.94e-05	8.28e-05	-3.43278e-06	1.17e-05	-1.12e-05	1.1e-05	-5.71e-06	9.31504e-06	159.507	50.6839	58.3453	922.835	824.868
36850-81	430PRC	4b	6	3.41399e-16	0.0432123	0.0007716	0.0144953	9.54e-05	0.0001759	1.26e-05	4.71e-05	9.70979e-06	-4.97e-06	1.01e-05	103.538	3.08322	0.215882	71.8036	4.86794
36850-85	430PRC	4b	6	2.24325e-17	0.0028394	0.0007654	1.36e-05	8.04e-05	-6.48642e-06	1.2e-05	-6.80266e-06	1.1e-05	2.32e-06	1.02e-05	75.3611	156.676	985.171	2021.34	7608.42
36850-86	430PRC	4b	6	2.19222e-15	0.277499	0.0009774	0.0612045	0.0002043	0.000763	1.6e-05	3.8e-05	9.50158e-06	2.28e-05	1.06e-05	97.5647	4.41894	0.0567431	102.047	1.25849
36850-87	430PRC	4b	6	8.52809e-18	0.0010795	0.0007569	-0.000138	8.19e-05	-1.8e-05	1.12e-05	-1.05e-05	9.16788e-06	1.39e-05	1.01e-05	-285.724	22.3524	26.4337	465.587	480.361
36850-88	430PRC	4b	6	2.06318e-17	0.0026116	0.0007453	0.0008198	0.0001331	4.74441e-06	1.17e-05	5.97258e-07	1.11e-05	7.36e-06	9.84733e-06	15.8461	0.504229	3.70899	11.9396	86.4198
36850-89	430PRC	4b	6	2.96154e-18	0.0003749	0.0007398	-7.46887e-06	9.42e-05	-4.63169e-06	1.09e-05	4.91979e-06	9.50158e-06	-2.97e-06	9.96243e-06	337.723	-168.438	2229.61	#NUM!	-43954
36850-91	430PRC	4b	6	7.33407e-18	0.0009283	0.0007596	0.0001744	0.0001019	4.65e-05	1.77e-05	3.11e-05	1.15e-05	2.2e-05	9.84733e-06	-605.127	-32.2286	26.2394	-995.763	1059.13
Weighted Mean																2.8446	0.00661192	66.3475	0.150795
Sample JC13-4			J = 0.013017 ± 4.49930E-06
37130-01	456PRC	20	6	7.96787e-15	1.01009	0.0012322	0.35236	0.0004289	0.0041519	4.05e-05	0.0005414	1.12e-05	1.14e-05	1.36e-05	99.6832	2.8553	0.0132008	65.9815	0.298517
37130-02	456PRC	20	6	2.91521e-15	0.369574	0.0010763	0.127652	0.0001821	0.001515	1.86e-05	0.0002439	1.09e-05	1.05e-05	1.36e-05	99.1735	2.86898	0.0335018	66.2919	0.757466
37130-03	456PRC	20	6	7.14524e-15	0.905711	0.0010397	0.314333	0.0003704	0.0037359	4.15e-05	0.0004038	1.53e-05	2.23e-05	1.34e-05	99.2825	2.85842	0.0142267	66.0524	0.321704
37130-04	456PRC	20	6	3.25825e-15	0.413027	0.000906	0.142692	0.0001999	0.0016793	2.02e-05	0.0002218	9.51893e-06	2.18e-05	1.34e-05	98.445	2.84727	0.0293171	65.7992	0.663032
37130-05	456PRC	20	6	7.07835e-15	0.897325	0.0010837	0.311893	0.000351	0.0037726	3.76e-05	0.0004521	1.53e-05	3.04e-05	1.37e-05	99.0066	2.84618	0.0145778	65.7745	0.329695
37130-06	456PRC	20	6	7.46584e-15	0.946521	0.0010615	0.329333	0.0003704	0.0038752	2.46e-05	0.0004456	1.06e-05	2.99e-05	1.37e-05	99.073	2.84514	0.0138851	65.7509	0.314033
37130-07	456PRC	20	6	5.38238e-15	0.682416	0.00097	0.234521	0.0002742	0.0028327	3.67e-05	0.0003241	1.37e-05	3.35e-05	1.32e-05	98.5524	2.86542	0.0181574	66.2112	0.410553
37130-09	456PRC	20	6	6.73562e-15	0.853901	0.0012322	0.296779	0.0003704	0.0036297	4.15e-05	0.0004698	1.45e-05	2.63e-05	1.36e-05	99.1009	2.84909	0.01534	65.8405	0.34692
37130-10	456PRC	20	6	6.5528e-15	0.830663	0.0010469	0.290216	0.0003607	0.0033492	2.28e-05	0.0003893	1.07e-05	1.88e-05	1.37e-05	99.3393	2.84104	0.0155047	65.6579	0.35068
37130-12	456PRC	20	6	6.71512e-15	0.851227	0.001137	0.271351	0.0003607	0.0032418	2.28e-05	0.0003433	1.29e-05	0.0002597	1.45e-05	90.9023	2.84938	0.0178007	65.8473	0.402569
37130-13	456PRC	20	6	4.48888e-15	0.568992	0.00097	0.196207	0.0001999	0.0023093	2.02e-05	0.000576	1.13e-05	2.79e-05	1.33e-05	98.573	2.8563	0.0214237	66.0043	0.484461
37130-14	456PRC	20	6	5.47471e-15	0.693935	0.0009904	0.241235	0.0002742	0.0029659	3.1e-05	0.0003563	1.45e-05	3.45e-05	1.34e-05	98.5334	2.83214	0.0179395	65.4558	0.405794
37130-15	456PRC	20	6	2.14721e-15	0.272169	0.0008766	0.0940861	0.0001648	0.0011172	1.7e-05	0.0001873	1.18e-05	2.62e-05	1.29e-05	97.1543	2.80821	0.0426694	64.9125	0.965479
37130-16	456PRC	20	6	4.96985e-15	0.629872	0.0008491	0.218681	0.0002553	0.0027116	3.48e-05	0.0016959	2.25e-05	1.89e-05	1.35e-05	99.2074	2.85526	0.0195668	65.9806	0.442477
37130-17	456PRC	20	6	7.22652e-15	0.915807	0.0011293	0.310169	0.000351	0.0036669	2.37e-05	0.0005178	1.19e-05	8.77e-05	1.36e-05	97.1601	2.86648	0.0146878	66.2351	0.332099
37130-19	456PRC	20	6	2.43048e-15	0.308007	0.000906	0.107225	0.0001821	0.0012599	1.86e-05	0.0001458	9.96243e-06	1.84e-05	1.29e-05	98.2308	2.81943	0.037606	65.1673	0.850791
37130-20	456PRC	20	6	6.97779e-15	0.884269	0.0012322	0.30776	0.000478	0.0036362	3.67e-05	0.0004823	1.37e-05	4.08e-05	1.33e-05	98.6423	2.83196	0.0148237	65.4517	0.335317
37130-23	456PRC	19b	6	6.9329e-15	0.879179	0.0012243	0.305019	0.000351	0.0035245	2.59e-05	0.000338	1.28e-05	2.9e-05	1.37e-05	99.0351	2.85188	0.0146182	65.9038	0.330584
37130-24	456PRC	19b	6	5.51502e-15	0.699394	0.0009974	0.244116	0.0002553	0.0028076	2.59e-05	0.0002147	9.19348e-06	2.59e-05	1.36e-05	98.9118	2.83115	0.0176057	65.4334	0.398248
37130-26	456PRC	19b	6	8.21138e-15	1.04151	0.0012175	0.361026	0.0003801	0.0043763	4.61e-05	0.0003285	9.33381e-06	3.21e-05	1.36e-05	99.0991	2.85619	0.0124286	66.0017	0.281053
37130-27	456PRC	19b	6	7.15476e-15	0.907549	0.0011844	0.315014	0.0003607	0.003696	2.69e-05	0.0004919	1.28e-05	2.02e-05	1.35e-05	99.3648	2.85999	0.0140481	66.0879	0.317661
37130-28	456PRC	19b	6	7.79928e-15	0.989386	0.001191	0.344541	0.0003704	0.0040995	3.83e-05	0.0004338	1.37e-05	2.6e-05	1.37e-05	99.2407	2.84711	0.0129972	65.7956	0.293944
37130-29	456PRC	19b	6	7.90682e-15	1.0031	0.0013086	0.350628	0.000351	0.0041517	3.54e-05	0.0002656	9.33381e-06	1.92e-05	1.36e-05	99.4429	2.84223	0.0127916	65.685	0.289313
37130-30	456PRC	19b	6	7.33595e-15	0.930491	0.001191	0.322049	0.0003898	0.0039587	3.92e-05	0.0003544	9.12414e-06	2.36e-05	1.41e-05	99.2654	2.86535	0.0142865	66.2095	0.323028
37130-33	456PRC	19b	6	6.34655e-15	0.805	0.0011463	0.279307	0.0003028	0.0033797	4.51e-05	0.0002408	9.47629e-06	1.57e-05	1.35e-05	99.433	2.86307	0.0155589	66.1579	0.351808
37130-34	456PRC	19b	6	5.95337e-15	0.755235	0.0011588	0.261644	0.0002932	0.0030363	2.59e-05	0.0002126	8.98721e-06	2.62e-05	1.33e-05	98.9782	2.8543	0.0163984	65.9587	0.370833
37130-35	456PRC	19b	6	5.17212e-15	0.656085	0.0011161	0.227117	0.0002742	0.0027573	3.16e-05	0.0002169	1.16e-05	9.27e-06	1.3e-05	99.5973	2.8744	0.0183975	66.4149	0.415935
37130-36	456PRC	19b	6	6.02091e-15	0.763792	0.0011715	0.265189	0.0003028	0.0032207	3.92e-05	0.0002245	8.85268e-06	8.85e-06	1.3e-05	99.6711	2.86798	0.0159297	66.2692	0.360172
37130-37	456PRC	19b	6	4.16017e-15	0.527799	0.0010929	0.182466	0.000209	0.0021544	2.14e-05	0.0001581	8.34086e-06	1.3e-05	1.33e-05	99.283	2.86912	0.0229477	66.2951	0.51884
37130-38	456PRC	19b	6	7.92418e-15	1.00546	0.0011715	0.34897	0.0003704	0.0042039	4.9e-05	0.0003104	9.69381e-06	3.53e-05	1.35e-05	98.9703	2.84884	0.0127362	65.8348	0.288035
37130-39	456PRC	19b	6	5.52361e-15	0.700875	0.0011463	0.243496	0.0002742	0.0028795	2.14e-05	0.0002608	8.91964e-06	3.79e-05	1.35e-05	98.4045	2.82976	0.0177285	65.4019	0.401033
37130-40	456PRC	19b	6	5.122e-15	0.649935	0.0011652	0.22559	0.0002742	0.0027397	3.44e-05	0.0001613	8.85268e-06	2.37e-05	1.32e-05	98.9247	2.84735	0.0187841	65.8011	0.424819
37130-42	456PRC	19b	6	5.62768e-15	0.714087	0.0011463	0.248092	0.0002742	0.0029306	2.59e-05	0.0002697	9.47629e-06	2.76e-05	1.37e-05	98.8689	2.84305	0.0176686	65.7035	0.399613
37130-43	456PRC	19b	6	5.33884e-15	0.677267	0.0011161	0.236359	0.0002647	0.0027759	2.41e-05	0.000213	8.98721e-06	2.34e-05	1.36e-05	98.9851	2.83363	0.0183267	65.4897	0.414545
37130-44	456PRC	19b	6	5.02712e-15	0.637702	0.0010929	0.221854	0.0002366	0.0026498	3.35e-05	0.0001943	8.5276e-06	2.67e-05	1.31e-05	98.7654	2.83622	0.0187715	65.5485	0.424593
37130-45	456PRC	19b	6	7.87417e-15	0.998773	0.0012379	0.348305	0.0003996	0.0040359	2.59e-05	0.0002874	1.2e-05	8.03e-06	1.38e-05	99.7759	2.85836	0.0130517	66.051	0.295134
37130-46	456PRC	16b	6	7.00096e-15	0.887057	0.0012702	0.308762	0.0003423	0.0035998	2.42e-05	0.0001583	9.44034e-06	2.53e-05	1.28e-05	99.1659	2.84574	0.0138558	65.7647	0.311523
37130-48	456PRC	16b	6	5.70586e-15	0.72293	0.0011732	0.252532	0.0003135	0.0029093	2.59e-05	0.0001814	1.07e-05	2.25e-05	1.27e-05	99.094	2.83356	0.0164607	65.4881	0.370147
37130-49	456PRC	16b	6	5.82194e-15	0.737618	0.0012261	0.255285	0.0002944	0.0029219	2.51e-05	0.0001209	9.20869e-06	3.09e-05	1.25e-05	98.7654	2.85047	0.0161304	65.8718	0.362642
37130-11	456PRC	20	6	7.20424e-15	0.913244	0.0009904	0.3169	0.000351	0.0037272	2.64e-05	0.0004334	1.53e-05	3.00006e-08	1.36e-05	100.017	2.87998	0.0141687	66.5414	0.320307
37130-25	456PRC	19b	6	9.39718e-15	1.19172	0.0012587	0.410634	0.0003607	0.004923	4.31e-05	0.0006175	1.55e-05	1.76e-05	1.35e-05	99.5889	2.8875	0.0109121	66.7121	0.246662
37130-31	456PRC	19b	6	1.01774e-14	1.29094	0.0012587	0.446163	0.0004289	0.0052686	2.87e-05	0.0005211	1.46e-05	1.05e-05	1.4e-05	99.7795	2.88433	0.0104849	66.6401	0.237015
37130-32	456PRC	19b	6	5.96136e-15	0.756086	0.0013159	0.260881	0.0003028	0.0030623	2.32e-05	0.0002469	9.12414e-06	1.02e-05	1.35e-05	99.6149	2.88432	0.0168368	66.6399	0.380603
37130-41	456PRC	19b	6	6.00215e-15	0.761603	0.0012942	0.263133	0.0002932	0.0031345	2.32e-05	0.0001973	8.40238e-06	1.27e-05	1.31e-05	99.5153	2.8776	0.0162382	66.4874	0.367101
37130-22	456PRC	19b	6	3.15872e-15	0.400562	0.0010872	0.0016761	0.0001051	9.6e-05	1.39e-05	0.0001641	8.40238e-06	0.0001359	1.37e-05	89.8926	214.781	14.1546	2411.71	87.5408
Weighted Mean																2.85588	0.00236893	65.9948	0.0577489
J = 0.013204 ± 2.65361E-06
36839-01	430PRB	1a	6	7.07161e-15	0.895268	0.0011667	0.315201	0.0004245	0.0037369	2.78e-05	0.0005148	1.7e-05	3.85e-05	1.23e-05	98.7335	2.80237	0.0132857	65.6911	0.301945
36839-02	430PRB	1a	6	1.0378e-14	1.3141	0.0015424	0.464132	0.000512	0.005456	3.04e-05	0.0010791	1.53e-05	1.43e-05	1.21e-05	99.6971	2.82074	0.0096305	66.114	0.218823
36839-03	430PRB	1a	6	5.05793e-15	0.640429	0.000969	0.224644	0.0003195	0.0026699	2.69e-05	0.0004234	1.24e-05	1.4e-05	1.15e-05	99.3649	2.83077	0.0168287	66.3447	0.38233
36839-04	430PRB	1a	6	7.27012e-15	0.92034	0.0011187	0.324813	0.0005217	0.0039383	4.14e-05	0.0006297	2.07e-05	4.07e-05	1.2e-05	98.6986	2.79461	0.0128722	65.5124	0.292575
36839-05	430PRB	1a	6	7.29995e-15	0.924121	0.001378	0.325212	0.0004924	0.0038549	3.04e-05	0.000778	1.37e-05	2.83e-05	1.26e-05	99.1089	2.8143	0.0135302	65.9656	0.307456
36839-06	430PRB	1a	6	8.97798e-15	1.13431	0.0014591	0.400833	0.0005217	0.004856	3.04e-05	0.0026822	3.3e-05	4.02e-05	1.18e-05	99.0101	2.79993	0.0107886	65.635	0.245201
36839-07	430PRB	1a	6	6.11185e-15	0.773758	0.0009638	0.27519	0.000473	0.0032545	2.87e-05	0.0004701	1.23e-05	3.33e-05	1.15e-05	98.7326	2.77413	0.0143135	65.0408	0.325419
36839-08	430PRB	1a	6	5.48857e-15	0.69483	0.0009794	0.240539	0.0003574	0.0030161	3.86e-05	0.0004739	1.21e-05	5.04e-05	1.15e-05	97.8551	2.8247	0.0158512	66.2051	0.360149
36839-09	430PRB	1a	6	1.18295e-14	1.49779	0.0015424	0.527163	0.00061	0.00641	5.48e-05	0.0008683	2.16e-05	3.32e-05	1.19e-05	99.3546	2.8209	0.0087247	66.1175	0.198241
36839-10	430PRB	1a	6	1.04229e-14	1.31956	0.0016275	0.466581	0.0005315	0.0057135	4.9e-05	0.0010318	2.44e-05	2.84e-05	1.2e-05	99.3808	2.80865	0.0096303	65.8356	0.218852
36839-12	430PRB	1a	6	8.54096e-15	1.08079	0.0014591	0.381415	0.0004924	0.0046074	5.29e-05	0.000727	1.7e-05	2.2e-05	1.21e-05	99.4109	2.81494	0.0113916	65.9803	0.258856
36839-14	430PRB	1a	6	9.122e-15	1.1546	0.0014591	0.406749	0.0005413	0.0049067	4.14e-05	0.000774	1.45e-05	2.63e-05	1.2e-05	99.3396	2.81787	0.0108213	66.0479	0.245888
36839-15	430PRB	1a	6	1.10743e-14	1.40178	0.0015424	0.495568	0.0006592	0.0059989	4.33e-05	0.0009479	2.16e-05	3.67e-05	1.22e-05	99.2369	2.80506	0.0094814	65.753	0.215476
36839-16	430PRB	1a	6	8.09059e-15	1.02381	0.001378	0.360516	0.000473	0.0043702	4.9e-05	0.0006994	1.26e-05	4.69e-05	1.15e-05	98.6524	2.7996	0.0114579	65.6272	0.260414
36839-17	430PRB	1a	6	8.1699e-15	1.03384	0.0015424	0.364772	0.000512	0.0042522	5e-05	0.000576	1.53e-05	5.28e-05	1.2e-05	98.4919	2.7895	0.0119286	65.3947	0.271146
36839-18	430PRB	1a	6	4.12077e-15	0.52145	0.0011322	0.184283	0.0003384	0.0022262	2.44e-05	0.0003034	1.1e-05	2.39e-05	1.19e-05	98.6499	2.78942	0.0212272	65.3929	0.482511
36839-19	430PRB	1a	6	8.91818e-15	1.12853	0.001217	0.398632	0.0005413	0.0047619	4.05e-05	0.0006636	1.88e-05	8.49e-06	1.21e-05	99.7923	2.82312	0.0108488	66.1687	0.246496
36839-20	430PRB	1a	6	6.54695e-15	0.828305	0.0014591	0.289921	0.0004342	0.0034677	2.78e-05	0.000564	1.7e-05	1.56e-05	1.23e-05	99.4561	2.83946	0.0147615	66.5446	0.335328
36839-22	430PRB	2	6	5.38466e-15	0.681479	0.0018764	0.240225	0.0003788	0.0029151	4.05e-05	0.0002529	1.16e-05	4.4e-05	1.51e-05	98.0895	2.78019	0.0213098	65.1803	0.484445
36839-23	430PRB	2	6	6.84457e-15	0.866274	0.0019821	0.306354	0.0004769	0.0036595	3.01e-05	0.0003294	1.08e-05	2.35e-05	1.59e-05	99.2081	2.80282	0.017846	65.7014	0.405584
36839-24	430PRB	2	6	1.0438e-14	1.32105	0.0020543	0.464913	0.0005559	0.005583	3.48e-05	0.0010378	1.63e-05	5.66e-05	1.53e-05	98.7575	2.80372	0.0119554	65.722	0.271706
36839-27	430PRB	2	6	6.94077e-15	0.878436	0.0019698	0.305176	0.0005164	0.0036373	2.37e-05	0.0003335	1.54e-05	6e-05	1.52e-05	97.9797	2.81782	0.0174935	66.0467	0.397499
36839-28	430PRB	2	6	8.14547e-15	1.03085	0.0020591	0.364613	0.0004868	0.0043758	4.73e-05	0.0003909	1.26e-05	2.78e-05	1.55e-05	99.2126	2.80248	0.0149899	65.6936	0.340674
36839-29	430PRB	2	6	8.70167e-15	1.10133	0.00204	0.386327	0.0005065	0.0046387	4.54e-05	0.0005534	1.3e-05	2.76e-05	1.53e-05	99.2744	2.82759	0.0140905	66.2715	0.320134
36839-30	430PRB	2	6	5.85948e-15	0.741579	0.0019617	0.261456	0.0003885	0.0031279	2.55e-05	0.0002851	1.22e-05	1.15e-05	1.51e-05	99.5531	2.82117	0.0197265	66.1238	0.448219
36839-32	430PRB	3c	6	5.36543e-15	0.679392	0.001494	0.235491	0.0003823	0.002831	3.82e-05	0.000206	1.16e-05	1.74e-05	1.27e-05	99.2545	2.86063	0.0182513	67.0316	0.414495
36839-33	430PRB	3c	6	1.12976e-14	1.43052	0.002	0.506588	0.0008256	0.0059868	3.15e-05	0.0003218	1.2e-05	-6.83e-06	1.31e-05	100.157	2.82542	0.0102656	66.2215	0.233239
36839-34	430PRB	3c	6	6.24406e-15	0.790662	0.0016279	0.281041	0.0005091	0.0034744	3.82e-05	0.0002161	1.49e-05	1.92e-05	1.24e-05	99.2942	2.79066	0.0156078	65.4214	0.35477
36839-36	430PRB	3c	6	9.00433e-15	1.1402	0.0018439	0.404802	0.0006076	0.0047872	3.05e-05	0.0003547	1.19e-05	3.3e-06	1.29e-05	99.9342	2.81197	0.011762	65.9121	0.267283
36839-37	430PRB	3c	6	6.06943e-15	0.768571	0.0015621	0.271337	0.0004601	0.0032078	2.49e-05	0.0001934	1.17e-05	3.82e-06	1.21e-05	99.8682	2.82594	0.0156701	66.2336	0.356028
36839-38	430PRB	3c	6	1.0893e-14	1.37929	0.002	0.483906	0.0006274	0.0058261	3.05e-05	0.000421	1.41e-05	4.65e-05	1.31e-05	99.0128	2.81934	0.0102361	66.0816	0.232586
36839-39	430PRB	3c	6	6.32691e-15	0.801055	0.0016971	0.283344	0.0004308	0.0034211	2.49e-05	0.0002287	1.11e-05	2.46e-05	1.25e-05	99.1038	2.79897	0.0154565	65.6129	0.351294
36839-40	430PRB	3c	6	4.84094e-15	0.612804	0.0016279	0.215779	0.0003437	0.0026354	3.43e-05	0.0002297	1.49e-05	2.71e-05	1.24e-05	98.7065	2.8004	0.019597	65.6458	0.445392
36839-41	430PRB	3c	6	7.04516e-15	0.891827	0.0016279	0.315023	0.0004601	0.003729	2.67e-05	0.0004071	1.25e-05	2.59e-05	1.22e-05	99.1638	2.80449	0.0136858	65.7398	0.311028
36839-42	430PRB	3c	6	5.62347e-15	0.711877	0.0015305	0.252526	0.0004016	0.0029997	2.49e-05	0.0001677	1.07e-05	-2.5e-06	1.22e-05	100.121	2.81957	0.0166098	66.0869	0.37741
36839-44	430PRB	3c	6	5.00017e-15	0.632949	0.0016279	0.223306	0.0003533	0.0027825	3.53e-05	0.0001414	1.11e-05	2.5e-05	1.23e-05	98.8365	2.79863	0.0188312	65.605	0.427997
36839-46	430PRB	3c	6	8.96765e-15	1.13518	0.002	0.402344	0.0009051	0.0049257	4.6e-05	0.0003179	1.23e-05	2.1e-05	1.26e-05	99.4668	2.80354	0.0128111	65.7179	0.291153
36839-47	430PRB	3c	6	1.17131e-14	1.48325	0.0019209	0.526052	0.000776	0.0064814	4.89e-05	0.00037	1.25e-05	2.94e-05	1.32e-05	99.4255	2.80055	0.0097414	65.6491	0.221399
36839-48	430PRB	3c	6	9.78085e-15	1.2382	0.0017692	0.435684	0.0008554	0.0052945	4.6e-05	0.0002994	1.2e-05	2.64e-05	1.28e-05	99.3808	2.82151	0.0116061	66.1317	0.263709
36839-49	430PRB	3c	6	7.78772e-15	0.985811	0.0016971	0.348263	0.0006571	0.0041305	3.05e-05	0.0002672	1.12e-05	2e-05	1.28e-05	99.4124	2.81116	0.0135022	65.8934	0.306832
36839-51	430PRB	5d	6	6.29798e-15	0.796896	0.0005909	0.281109	0.0004334	0.0032703	2.66e-05	6.69e-05	9.20054e-06	2.63e-05	1.13e-05	99.0305	2.80347	0.013455	65.7163	0.305788
36839-52	430PRB	5d	6	5.90594e-15	0.747232	0.0007779	0.263012	0.0004532	0.0031268	2.57e-05	5.32e-05	9.14002e-06	1.41e-05	1.11e-05	99.4498	2.82152	0.0143401	66.1318	0.325829
36839-53	430PRB	5d	6	6.83793e-15	0.865022	0.0008065	0.298711	0.0005427	0.0036113	3.14e-05	7.26e-05	8.90506e-06	6.04e-05	1.13e-05	97.9303	2.83202	0.0133196	66.3734	0.302603
36839-54	430PRB	5d	6	8.74975e-15	1.10688	0.0010284	0.39055	0.0006622	0.0044279	4.3e-05	9.15e-05	9.32363e-06	4.19e-05	1.24e-05	98.8842	2.79867	0.0115453	65.6059	0.262402
36839-56	430PRB	5d	6	6.6326e-15	0.838981	0.0008736	0.296127	0.0004235	0.0036275	3.14e-05	9.47e-05	9.44934e-06	2.3e-05	1.11e-05	99.2025	2.8067	0.0128062	65.7908	0.29103
36839-57	430PRB	5d	6	1.04205e-14	1.31812	0.0012238	0.465033	0.0005825	0.0056971	4.99e-05	0.0001407	9.26175e-06	4.85e-05	1.13e-05	98.9234	2.80007	0.0092088	65.638	0.209294
36839-58	430PRB	5d	6	5.72862e-15	0.7249	0.0005367	0.255425	0.0003739	0.0030953	2.48e-05	7.95e-05	9.0802e-06	3.55e-05	1.13e-05	98.5576	2.79321	0.0144105	65.4803	0.327545
36839-60	430PRB	5d	6	8.35355e-15	1.0571	0.0009702	0.373485	0.0004632	0.0045117	4.3e-05	0.0001038	9.64261e-06	1.27e-05	1.17e-05	99.6615	2.81688	0.0108939	66.025	0.24754
36839-61	430PRB	7a	6	8.14065e-15	1.03106	0.0022731	0.360321	0.0004736	0.0042679	2.73e-05	1.02e-05	1.16e-05	3.45e-05	1.56e-05	99.0182	2.82729	0.0155148	66.2647	0.353876
36839-62	430PRB	7a	6	4.11508e-15	0.521192	0.0021436	0.183836	0.0002469	0.0021837	2.56e-05	3.92e-05	1.1e-05	1.86e-05	1.56e-05	99.0601	2.80247	0.0287161	65.6932	0.65519
36839-63	430PRB	7a	6	4.39094e-15	0.556084	0.0022299	0.195248	0.0002372	0.0023608	4.02e-05	1.97e-05	1.21e-05	1.16e-05	1.55e-05	99.4383	2.82601	0.0271057	66.2353	0.618262
36839-64	430PRB	7a	6	4.81768e-15	0.610102	0.0022402	0.212126	0.0003252	0.0025625	3.83e-05	-2.03e-05	1.13e-05	1.85e-05	1.54e-05	99.04	2.84232	0.025083	66.6105	0.572009
36839-65	430PRB	7a	6	4.45321e-15	0.563885	0.0022847	0.194977	0.0002469	0.0023389	2.56e-05	2.65e-05	1.45e-05	4.25e-05	1.59e-05	97.8258	2.82313	0.027784	66.1689	0.633757
36839-66	430PRB	7a	6	4.40276e-15	0.557444	0.0021436	0.193698	0.0002762	0.002286	2.64e-05	2.8e-05	1.16e-05	1.97e-05	1.54e-05	99.0253	2.84375	0.0270651	66.6433	0.6172
36839-67	430PRB	7a	6	5.40792e-15	0.684711	0.0022655	0.237822	0.0003351	0.0028374	2.73e-05	-6.13627e-06	1.45e-05	-1.36e-06	1.53e-05	100.044	2.87413	0.0223389	67.3423	0.509225
36839-68	430PRB	7a	6	4.34034e-15	0.549531	0.0021396	0.192758	0.0002566	0.0022638	2.3e-05	1.48e-05	1.16e-05	4.67e-05	1.57e-05	97.5042	2.77374	0.0275172	65.0318	0.628066
36839-69	430PRB	7b	6	3.58259e-15	0.453606	0.0009266	0.15914	0.0002486	0.0018893	2.08e-05	1.67e-05	1.25e-05	2.43e-05	1.5e-05	98.4583	2.80037	0.0293863	65.645	0.670499
36839-71	430PRB	7b	6	4.32491e-15	0.547658	0.0008989	0.18795	0.0002103	0.0022934	2.42e-05	3.2e-05	1.26e-05	6.49e-05	1.45e-05	96.5605	2.80762	0.0241007	65.8118	0.549849
36839-72	430PRB	7b	6	4.62617e-15	0.58586	0.0008683	0.20681	0.0002777	0.0024006	2.42e-05	7.91123e-06	1.3e-05	2.5e-05	1.4e-05	98.7473	2.7913	0.0214332	65.4363	0.489091
36839-74	430PRB	7b	6	5.93224e-15	0.751383	0.0010748	0.263485	0.0004052	0.0032327	3.7e-05	6.08556e-06	1.56e-05	4.56e-05	1.43e-05	98.2036	2.79442	0.0177188	65.5081	0.404315
36839-75	430PRB	7b	6	3.32608e-15	0.421288	0.0008497	0.148014	0.0002294	0.001917	2.95e-05	2.99e-05	1.3e-05	4.06e-05	1.44e-05	97.2483	2.76203	0.0302861	64.7622	0.691365
36839-76	430PRB	7b	6	2.5125e-15	0.318228	0.0009209	0.109697	0.0002008	0.0013133	1.92e-05	1.18668e-06	1.28e-05	2.21e-05	1.46e-05	97.9287	2.83473	0.0412103	66.4359	0.939875
36839-77	430PRB	7b	6	3.09488e-15	0.391906	0.0008732	0.136015	0.000239	0.0016244	2e-05	-1.06e-05	1.56e-05	1.55e-05	1.42e-05	98.7712	2.83974	0.0325527	66.5511	0.742378
36839-78	430PRB	7b	6	9.82522e-15	1.2442	0.0014204	0.444256	0.0005042	0.0054182	5.14e-05	-9.7369e-06	1.63e-05	4.02e-05	1.5e-05	99.0233	2.76724	0.0116961	64.8821	0.266979
36839-79	430PRB	7b	6	5.49554e-15	0.695798	0.0010001	0.244113	0.0003658	0.0029142	2.51e-05	2.55e-05	1.28e-05	4.09e-05	1.46e-05	98.3089	2.79607	0.0193011	65.5461	0.440413
36839-80	430PRB	7b	6	4.93819e-15	0.625255	0.0008635	0.219061	0.0003462	0.0027035	3.98e-05	1.01e-05	1.32e-05	3.09e-05	1.48e-05	98.5542	2.80689	0.0214564	65.7951	0.489525
36839-21	430PRB	2	6	6.69774e-16	0.0847723	0.0018337	0.0049766	0.0001084	5.54e-05	1.7e-05	0.0024713	2.26e-05	0.0001028	1.52e-05	65.1454	11.1119	1.02532	247.522	21.0943
36839-31	430PRB	3c	6	4.11923e-15	0.520579	0.0013507	0.0063387	0.0001263	8.88e-05	1.86e-05	6.77e-05	1.08e-05	0.0001081	1.23e-05	93.8065	76.9865	1.71321	1268.07	20.1268
36839-55	430PRB	5d	6	3.40436e-16	0.0430688	0.0003466	0.0011017	8e-05	3.25e-05	1.36e-05	2.58e-05	8.9627e-06	0.0001237	1.13e-05	14.3876	5.62031	3.11716	129.425	68.4151
Weighted Mean																2.80987	0.00172677	65.8639	0.0414534
Sample JC13-2			J = 0.013168 ± 2.90725E-06
37002-01	443PRA	12b	6	1.22809e-14	1.5556	0.0014768	0.549459	0.0004844	0.0066631	5.75e-05	0.000124	1.34e-05	3.15e-05	1.28e-05	99.4082	2.81066	0.0084751	65.709	0.19496
37002-02	443PRA	12b	6	1.71665e-14	2.1742	0.0019573	0.767216	0.0006234	0.0092593	6.33e-05	0.0001703	1.41e-05	4.09e-05	1.36e-05	99.4506	2.81458	0.0070521	65.7991	0.162217
37002-03	443PRA	12b	6	2.63171e-14	3.33338	0.0028392	1.17167	0.0007628	0.0140677	6.92e-05	0.0001899	2.11e-05	4.78e-05	1.41e-05	99.5809	2.8293	0.0056575	66.1369	0.130113
37002-04	443PRA	12b	6	1.08259e-14	1.37112	0.0012888	0.483664	0.0004943	0.0057403	4.49e-05	0.0001631	1.43e-05	1.82e-05	1.27e-05	99.6232	2.82043	0.0093126	65.9334	0.214199
37002-07	443PRA	12b	6	7.81364e-15	0.989732	0.0011962	0.348905	0.0003757	0.0042258	4.3e-05	6.19e-05	1.78e-05	3.16e-05	1.26e-05	99.0559	2.80617	0.0121698	65.606	0.279969
37002-08	443PRA	12b	6	1.62082e-14	2.05323	0.0015719	0.722604	0.000524	0.0085904	4.02e-05	0.0002578	1.43e-05	2.98e-05	1.35e-05	99.5865	2.82593	0.0070631	66.0597	0.162448
37002-09	443PRA	12b	6	2.17019e-14	2.74909	0.0028392	0.972189	0.0007329	0.0116848	7.91e-05	0.0001834	1.78e-05	4.22e-05	1.4e-05	99.5531	2.81135	0.0064517	65.725	0.148414
37002-10	443PRA	12b	6	1.58048e-14	2.00192	0.0015719	0.705614	0.0005439	0.0084292	6.33e-05	0.0001345	1.38e-05	1.57e-05	1.37e-05	99.7768	2.82704	0.0072882	66.0851	0.167622
37002-11	443PRA	12b	6	1.66224e-14	2.1055	0.0014768	0.742346	0.0006135	0.0089183	6.43e-05	0.0001776	1.56e-05	3.1e-05	1.34e-05	99.5741	2.82045	0.0069365	65.9339	0.159546
37002-12	443PRA	12b	6	1.41179e-14	1.78838	0.0015719	0.627492	0.0005141	0.0077585	5.17e-05	0.0001409	1.41e-05	3.54e-05	1.33e-05	99.4232	2.82983	0.0078681	66.1492	0.180952
37002-13	443PRA	12b	6	7.79259e-15	0.987132	0.0011962	0.346705	0.0003954	0.0040573	3.18e-05	2.75e-05	1.63e-05	9.2e-06	1.27e-05	99.7256	2.83559	0.0123303	66.2813	0.283555
37002-14	443PRA	12b	6	1.38469e-14	1.75446	0.0015719	0.620679	0.0004646	0.0075991	4.88e-05	9.75e-05	1.78e-05	5.91e-06	1.35e-05	99.9094	2.82035	0.0079247	65.9315	0.182276
37002-15	443PRA	12b	6	1.40903e-14	1.7854	0.0015719	0.627681	0.0004943	0.0074953	5.17e-05	0.0001789	2.02e-05	4.17e-05	1.36e-05	99.3186	2.8213	0.0079418	65.9533	0.182667
37002-16	443PRA	12b	6	9.76102e-15	1.23644	0.0012888	0.435675	0.0004448	0.0052522	3e-05	6.55e-05	1.56e-05	2.6e-05	1.27e-05	99.3806	2.81666	0.0101399	65.8467	0.233239
37002-17	443PRA	12b	6	1.80344e-14	2.28436	0.0020545	0.80798	0.000524	0.0096101	6.63e-05	0.0001529	1.37e-05	3.66e-05	1.34e-05	99.5331	2.81029	0.0066375	65.7006	0.152689
37002-18	443PRA	12b	6	1.8033e-14	2.28427	0.0018603	0.809103	0.0005638	0.0098304	6.04e-05	0.0001743	1.49e-05	2.96e-05	1.34e-05	99.6256	2.8089	0.0065703	65.6686	0.151145
37002-19	443PRA	12b	6	6.83741e-15	0.866085	0.0010779	0.303939	0.000356	0.0036505	4.3e-05	6.82e-05	1.63e-05	3.88e-05	1.29e-05	98.6756	2.80805	0.0139912	65.6492	0.321861
37002-20	443PRA	12b	6	1.54429e-14	1.95606	0.0016676	0.688896	0.0005439	0.0081656	5.85e-05	0.0001387	1.46e-05	3.42e-05	1.38e-05	99.4892	2.82115	0.0075172	65.9499	0.172902
37002-21	443PRA	12b	6	1.20565e-14	1.52726	0.0012888	0.537696	0.0005042	0.006433	5.65e-05	0.0001014	1.63e-05	2.81e-05	1.34e-05	99.4624	2.82134	0.0088333	65.9543	0.203171
37002-22	443PRA	12b	6	7.74579e-15	0.981095	0.0011962	0.346215	0.0003658	0.004086	2.82e-05	9.73e-05	1.43e-05	2.72e-05	1.29e-05	99.1869	2.80698	0.0124264	65.6245	0.285869
37002-23	443PRA	12b	6	1.5026e-14	1.90352	0.0016676	0.671998	0.0005737	0.0079899	4.3e-05	0.0001555	1.7e-05	4.62e-05	1.35e-05	99.2892	2.80874	0.0076211	65.6649	0.17532
37002-24	443PRA	12b	6	1.4228e-14	1.80211	0.0014768	0.634983	0.0005638	0.007478	3.83e-05	0.0001296	1.94e-05	2.32e-05	1.34e-05	99.6275	2.82369	0.0078487	66.0083	0.18052
37002-25	443PRA	12b	6	1.07707e-14	1.36436	0.0011962	0.480996	0.000425	0.005854	4.88e-05	0.000139	1.78e-05	2.15e-05	1.29e-05	99.5476	2.81994	0.0092764	65.922	0.213367
37002-26	443PRA	12b	6	1.44258e-14	1.82735	0.0015719	0.642802	0.000524	0.0078003	6.04e-05	0.0001177	1.94e-05	3.56e-05	1.35e-05	99.4296	2.82279	0.007793	65.9876	0.179242
37002-27	443PRA	12b	6	7.72384e-15	0.978357	0.0010779	0.344976	0.0004151	0.0041545	4.4e-05	3.63e-05	1.7e-05	2.23e-05	1.29e-05	99.3252	2.8131	0.0124785	65.7651	0.287045
37002-28	443PRA	12b	6	1.98488e-14	2.51415	0.002152	0.888232	0.0006035	0.0107536	6.14e-05	0.0001748	1.86e-05	2.52e-05	1.37e-05	99.7132	2.81862	0.0063666	65.8918	0.146442
37002-29	443PRA	12b	6	1.64208e-14	2.07997	0.0016676	0.733098	0.0005836	0.0086189	3.73e-05	0.0001474	1.47e-05	4.74e-05	1.34e-05	99.3313	2.81449	0.0070834	65.7971	0.162938
37002-30	443PRA	12b	6	1.42148e-14	1.8007	0.0013824	0.629115	0.0005042	0.0076271	5.26e-05	0.0001069	1.86e-05	5.85e-05	1.37e-05	99.0399	2.83101	0.0079145	66.1761	0.182018
37002-31	443PRA	12b	6	1.69369e-14	2.14559	0.0016676	0.757586	0.0005538	0.0091933	6.53e-05	0.0001148	1.78e-05	4.4e-05	1.38e-05	99.3967	2.81128	0.0069596	65.7232	0.160096
37002-32	443PRA	12b	6	1.29245e-14	1.63711	0.0013824	0.574367	0.0005538	0.0067899	3.18e-05	5.78e-05	1.78e-05	3.44e-05	1.32e-05	99.3777	2.82876	0.0083917	66.1246	0.192996
37002-33	443PRA	12b	6	1.17676e-14	1.49047	0.0013824	0.524201	0.0004448	0.0062234	5.26e-05	0.0001094	1.42e-05	2.72e-05	1.31e-05	99.4672	2.82438	0.0088663	66.0241	0.203923
37002-34	443PRA	12b	6	3.35527e-14	4.24993	0.0037297	1.50516	0.0007528	0.018313	8.9e-05	0.0002904	2.2e-05	2.39e-05	1.48e-05	99.8444	2.81539	0.0051264	65.8177	0.11792
37002-35	443PRA	12b	6	1.21363e-14	1.53727	0.0013824	0.542251	0.0004844	0.0064802	5.26e-05	0.000118	1.43e-05	1.28e-05	1.35e-05	99.7634	2.82448	0.0088406	66.0264	0.203332
37002-36	443PRA	12b	6	9.0966e-15	1.15219	0.0013824	0.406361	0.0004052	0.0048558	2.82e-05	8.94e-05	1.63e-05	-5.16e-06	1.29e-05	100.147	2.83574	0.0109104	66.2847	0.2509
37002-37	443PRA	12b	6	2.82016e-14	3.57241	0.0030366	1.26269	0.0006931	0.0152235	7.22e-05	0.0001826	2.11e-05	2.28e-05	1.48e-05	99.8187	2.82028	0.0054773	65.9299	0.125983
37002-39	443PRA	12b	6	1.22701e-14	1.55443	0.0015719	0.546882	0.0004844	0.0066115	5.46e-05	9.74e-05	1.41e-05	3.1e-05	1.31e-05	99.416	2.82196	0.0087227	65.9685	0.200626
37002-40	443PRA	12b	6	1.01678e-14	1.28811	0.0013824	0.451183	0.0004448	0.0053261	3.27e-05	8.35e-05	1.63e-05	5.72e-05	1.31e-05	98.6833	2.81358	0.0101665	65.7762	0.23386
37002-42	443PRA	13	6	1.92672e-14	2.44156	0.002318	0.864268	0.0006136	0.0102588	5.92e-05	0.0001711	1.3e-05	5.08e-05	1.34e-05	99.3946	2.80381	0.0064554	65.5517	0.148513
37002-43	443PRA	13	6	1.11717e-14	1.41548	0.0014909	0.49335	0.0004944	0.0059438	4.95e-05	6.56e-05	1.2e-05	8.69e-05	1.32e-05	98.177	2.81272	0.0095481	65.7564	0.219637
37002-44	443PRA	13	6	1.34958e-14	1.70989	0.0015789	0.600991	0.0005143	0.007198	5.34e-05	5.06e-05	1.49e-05	6.63e-05	1.31e-05	98.8485	2.80825	0.0080474	65.6538	0.185127
37002-45	443PRA	13	6	8.31722e-15	1.05359	0.0013202	0.370309	0.0004153	0.0043885	2.59e-05	6.14e-05	1.24e-05	5.22e-05	1.25e-05	98.5343	2.79938	0.0116	65.4501	0.266882
37002-46	443PRA	13	6	9.94754e-15	1.26008	0.0014909	0.442427	0.0004647	0.0053446	4.46e-05	7.65e-05	1.18e-05	4.49e-05	1.29e-05	98.9514	2.81413	0.0102761	65.7887	0.23638
37002-47	443PRA	13	6	9.24544e-15	1.17112	0.0014046	0.409518	0.0003857	0.0049188	4.27e-05	2.56e-05	1.41e-05	4.38e-05	1.29e-05	98.8889	2.82385	0.010814	66.0119	0.248722
37002-48	443PRA	13	6	9.26417e-15	1.17352	0.0014046	0.410762	0.0004252	0.0050009	4.18e-05	9.24e-05	1.2e-05	5.18e-05	1.27e-05	98.6996	2.81569	0.0107819	65.8245	0.248008
37002-49	443PRA	13	6	9.49379e-15	1.20247	0.0014909	0.422886	0.0004252	0.0052223	5.04e-05	6.39e-05	1.22e-05	5.58e-05	1.33e-05	98.6279	2.80037	0.0108703	65.4729	0.250092
37002-50	443PRA	13	6	9.98932e-15	1.26564	0.0015789	0.445379	0.0004252	0.0053712	4.46e-05	4.01e-05	1.56e-05	2.79e-05	1.29e-05	99.3488	2.81909	0.0102025	65.9025	0.234671
37002-51	443PRA	13	6	1.52758e-14	1.9349	0.0018501	0.682152	0.000544	0.0082915	5.53e-05	0.0001115	1.26e-05	4.82e-05	1.34e-05	99.2695	2.81163	0.0074856	65.7314	0.172196
37002-52	443PRA	13	6	8.75248e-15	1.10862	0.0014909	0.392948	0.000435	0.0046637	4.37e-05	3.96e-05	1.41e-05	2.49e-05	1.29e-05	99.3388	2.79854	0.0114269	65.4309	0.262903
37002-53	443PRA	13	6	1.15762e-14	1.46628	0.0014909	0.515597	0.000435	0.0060606	3.42e-05	8.48e-05	1.2e-05	1.65e-05	1.31e-05	99.6768	2.83052	0.0090042	66.1649	0.207078
37002-54	443PRA	13	6	1.15095e-14	1.45834	0.0014909	0.512609	0.0004746	0.0061304	3.79e-05	5.2e-05	1.21e-05	2.62e-05	1.34e-05	99.4722	2.82578	0.0092488	66.0562	0.212716
37002-55	443PRA	13	6	2.66358e-14	3.37369	0.0027969	1.19374	0.0007429	0.0144614	7.79e-05	0.0001475	1.72e-05	3.73e-05	1.49e-05	99.6803	2.81298	0.0055834	65.7623	0.128436
37002-56	443PRA	13	6	6.32975e-15	0.801952	0.0009513	0.282524	0.0003562	0.0033518	2.95e-05	5.9e-05	1.21e-05	3.05e-05	1.29e-05	98.8828	2.80271	0.0148549	65.5265	0.341753
37002-57	443PRA	13	6	1.8691e-14	2.36795	0.0024131	0.839272	0.0005738	0.0101026	5.24e-05	0.0001336	1.24e-05	2.12e-05	1.37e-05	99.746	2.81014	0.006694	65.6971	0.153988
37002-58	443PRA	13	6	2.56918e-14	3.25517	0.0030875	1.15098	0.0007928	0.0140007	6.51e-05	0.0001313	1.72e-05	5.36e-05	1.4e-05	99.5181	2.81042	0.0057643	65.7036	0.132601
37002-59	443PRA	13	6	1.13846e-14	1.4425	0.0014909	0.508097	0.0004647	0.006077	5.04e-05	4.98e-05	1.56e-05	3.24e-05	1.35e-05	99.3369	2.81607	0.009372	65.8333	0.215576
37002-60	443PRA	13	6	1.37722e-14	1.74465	0.0014909	0.614958	0.000544	0.0074398	5.63e-05	8.98e-05	1.24e-05	4.08e-05	1.31e-05	99.3149	2.81346	0.0078429	65.7733	0.180411
37002-61	443PRA	14b	6	8.19852e-15	1.03924	0.0013793	0.366041	0.0004032	0.004496	4.31e-05	6.78e-05	1.56e-05	2.62e-05	1.34e-05	99.2667	2.81399	0.012205	65.7856	0.28075
37002-62	443PRA	14b	6	1.22261e-14	1.54964	0.0016919	0.545382	0.0005324	0.0064537	2.97e-05	7.19e-05	1.26e-05	1.91e-05	1.35e-05	99.6452	2.82697	0.0087689	66.0834	0.201676
37002-63	443PRA	14b	6	1.20171e-14	1.52298	0.0016101	0.53577	0.0004628	0.0064335	5.19e-05	6.95e-05	1.28e-05	3.79e-05	1.4e-05	99.2698	2.81751	0.0089477	65.8663	0.205813
37002-65	443PRA	14b	6	1.04335e-14	1.32239	0.0014534	0.465734	0.0004628	0.0055574	2.69e-05	3.11e-05	1.56e-05	2.98e-05	1.37e-05	99.3332	2.81609	0.0099489	65.8337	0.228847
37002-66	443PRA	14b	6	1.04223e-14	1.32094	0.0016101	0.466317	0.0004728	0.0057562	4.8e-05	8.39e-05	1.56e-05	2.06e-05	1.38e-05	99.5543	2.81575	0.0101732	65.8259	0.234008
37002-67	443PRA	14b	6	1.15159e-14	1.45949	0.0016101	0.513749	0.0004529	0.0062641	4.9e-05	8.35e-05	1.26e-05	2.5e-05	1.41e-05	99.5053	2.82246	0.0093609	65.98	0.215305
37002-68	443PRA	14b	6	1.60078e-14	2.02899	0.0019474	0.714535	0.0005524	0.0085591	3.83e-05	8.76e-05	1.31e-05	3.64e-05	1.4e-05	99.4774	2.82041	0.0071311	65.9329	0.164023
37002-69	443PRA	14b	6	1.12283e-14	1.42317	0.0016101	0.501769	0.0004728	0.0061447	5.19e-05	5.14e-05	1.56e-05	2.57e-05	1.35e-05	99.4723	2.81699	0.0092969	65.8545	0.213847
37002-70	443PRA	14b	6	1.37033e-14	1.73688	0.0016101	0.610383	0.0004827	0.0073336	5.69e-05	8.68e-05	1.32e-05	4.95e-05	1.42e-05	99.1637	2.81742	0.0080372	65.8643	0.184871
37002-71	443PRA	14b	6	1.56444e-14	1.98284	0.0017755	0.689142	0.0005424	0.0083381	5.59e-05	7.87e-05	1.56e-05	0.0001364	1.44e-05	97.9573	2.81416	0.007426	65.7893	0.170819
37002-72	443PRA	14b	6	1.28887e-14	1.63355	0.0016101	0.577629	0.0004628	0.0069886	4.31e-05	6.46e-05	1.3e-05	4.67e-05	1.38e-05	99.1578	2.79989	0.0082681	65.4617	0.190224
37002-73	443PRA	14b	6	1.55251e-14	1.96784	0.0017755	0.694096	0.0005822	0.0084292	5.1e-05	2.85e-05	1.44e-05	1.83e-05	1.43e-05	99.7267	2.823	0.0073784	65.9924	0.169706
37002-74	443PRA	14b	6	1.35258e-14	1.71444	0.0016919	0.604271	0.0004926	0.0072959	5.1e-05	8.26e-05	1.31e-05	7.38e-05	1.38e-05	98.7289	2.79683	0.0079947	65.3914	0.18394
37002-75	443PRA	14b	6	1.41644e-14	1.79543	0.0017755	0.63447	0.0004628	0.0075066	5.1e-05	5.33e-05	1.3e-05	1.78e-05	1.36e-05	99.7123	2.81731	0.0075674	65.8618	0.174066
37002-76	443PRA	14b	6	1.43243e-14	1.81558	0.0019474	0.635783	0.0005424	0.0076828	5.29e-05	9.78e-05	1.56e-05	5.69e-05	1.43e-05	99.0807	2.82505	0.0080518	66.0394	0.185188
37002-77	443PRA	14a	6	1.75733e-14	2.22755	0.0020501	0.786887	0.0005744	0.009556	6.46e-05	0.0001114	9.98098e-06	2.81e-05	1.64e-05	99.6394	2.81628	0.0073513	65.8382	0.169096
37002-78	443PRA	14a	6	1.30577e-14	1.65515	0.0016861	0.580003	0.000505	0.0069731	4.68e-05	7.45e-05	8.6267e-06	3.7e-05	1.64e-05	99.346	2.83067	0.0095161	66.1684	0.218852
37002-79	443PRA	14a	6	1.18401e-14	1.50088	0.0014258	0.528512	0.0004358	0.006348	5.17e-05	5.66e-05	8.91403e-06	3.41e-05	1.68e-05	99.3323	2.81651	0.0103193	65.8433	0.237366
37002-80	443PRA	14a	6	1.75492e-14	2.22458	0.0019578	0.789375	0.0005645	0.0095889	6.16e-05	8.05e-05	9.5901e-06	2.82e-05	1.64e-05	99.6334	2.80348	0.0072528	65.5443	0.166858
37002-06	443PRA	12b	6	8.48314e-15	1.07444	0.0011962	0.377594	0.000425	0.0045149	2.91e-05	0.0001255	1.31e-05	-3.93e-06	1.27e-05	100.128	2.84536	0.0114854	66.5055	0.264091
37002-38	443PRA	12b	6	1.4657e-14	1.85673	0.0015719	0.602516	0.000534	0.0072543	3.73e-05	0.000128	1.7e-05	0.000209	1.37e-05	96.6498	2.97445	0.0085825	69.4655	0.19702
Weighted Mean																2.81685	0.000933578	65.8513	0.025568
J = 0.013017 ± 4.21430E-06
37129-01	456PRC	20	6	5.64479e-15	0.715592	0.000894	0.249913	0.000351	0.0029859	2.46e-05	0.0002187	9.96243e-06	1.34e-05	1.37e-05	99.4514	2.84542	0.0177455	65.7567	0.40134
37129-02	456PRC	20	6	1.19979e-14	1.5211	0.0017545	0.531138	0.0004977	0.0063269	4.73e-05	0.0005052	1.45e-05	1.27e-05	1.35e-05	99.7628	2.85481	0.0096269	65.9698	0.2177
37129-03	456PRC	20	6	1.03581e-14	1.31345	0.0013147	0.457781	0.0004387	0.0054924	4.73e-05	0.0003538	1.06e-05	2.13e-05	1.4e-05	99.5264	2.85332	0.0107398	65.9361	0.242871
37129-04	456PRC	20	6	1.55671e-14	1.97336	0.0013994	0.688674	0.0005075	0.0081681	5.22e-05	0.0005302	1.45e-05	1.69e-05	1.45e-05	99.754	2.85615	0.0079892	66.0003	0.180663
37129-05	456PRC	20	6	5.97747e-15	0.757803	0.0008653	0.264415	0.0003413	0.0031661	2.73e-05	0.000238	1.03e-05	-9.95e-06	1.33e-05	100.404	2.87526	0.0163347	66.4337	0.369295
37129-06	456PRC	20	6	9.00872e-15	1.1421	0.0012	0.398997	0.0003898	0.0047961	4.24e-05	0.0002657	1.06e-05	2.26e-05	1.34e-05	99.4168	2.8435	0.0115973	65.7132	0.262296
37129-07	456PRC	20	6	9.34004e-15	1.1841	0.0010912	0.412244	0.0004191	0.0048785	4.44e-05	0.0003174	1.08e-05	1.85e-05	1.37e-05	99.5443	2.85698	0.0114379	66.0192	0.258647
37129-08	456PRC	20	6	9.97712e-15	1.2649	0.0011841	0.441407	0.0003898	0.0053067	4.54e-05	0.0003658	1.1e-05	3.22e-05	1.37e-05	99.2514	2.84191	0.0107517	65.6771	0.243176
37129-09	456PRC	20	6	1.52525e-14	1.93366	0.0014861	0.675141	0.0005568	0.008087	5.32e-05	0.0005943	1.26e-05	-2.06e-06	1.43e-05	100.043	2.86305	0.0081497	66.1569	0.184277
37129-10	456PRC	20	6	4.688e-15	0.594357	0.0010988	0.207749	0.0003316	0.0024441	2.28e-05	0.0001338	1.01e-05	-3.6e-06	1.63e-05	100.189	2.86407	0.024786	66.1799	0.56044
37129-11	456PRC	20	6	8.09012e-15	1.02566	0.0010763	0.357882	0.0003704	0.0042621	3.38e-05	0.0002505	1.06e-05	1.85e-05	1.38e-05	99.4708	2.8485	0.012956	65.8266	0.293007
37129-12	456PRC	20	6	8.92705e-15	1.13162	0.0010988	0.393994	0.0003996	0.0046739	3.29e-05	0.0003723	1.08e-05	1.21e-05	1.34e-05	99.6937	2.86112	0.0116369	66.113	0.263134
37129-13	456PRC	20	6	9.64679e-15	1.22314	0.0012	0.426941	0.0004191	0.0050901	4.05e-05	0.0003473	1.07e-05	2.48e-05	1.32e-05	99.4056	2.84561	0.010848	65.7611	0.245343
37129-15	456PRC	20	6	1.02302e-14	1.29693	0.0011293	0.451584	0.0004289	0.0052974	3.01e-05	0.0003599	1.29e-05	2.24e-05	1.36e-05	99.4946	2.85516	0.0105375	65.9779	0.238292
37129-16	456PRC	20	6	8.91123e-15	1.12976	0.0013147	0.392894	0.0004583	0.0046605	4.34e-05	0.000292	1.03e-05	2.86e-05	1.36e-05	99.2537	2.85174	0.012107	65.9003	0.273794
37129-17	456PRC	20	6	1.23601e-14	1.56702	0.0012322	0.546443	0.000478	0.0065133	5.12e-05	0.0004616	1.45e-05	1.58e-05	1.39e-05	99.7105	2.8571	0.0092298	66.0219	0.208715
37129-18	456PRC	20	6	1.55901e-14	1.97646	0.0013994	0.686237	0.0005272	0.0083296	5.12e-05	0.0006373	1.37e-05	1.64e-05	1.44e-05	99.7641	2.87107	0.0080249	66.3388	0.181435
37129-19	456PRC	20	6	1.31275e-14	1.66408	0.0012322	0.579613	0.0004583	0.006847	5.32e-05	0.0006482	1.28e-05	2.86e-05	1.42e-05	99.5011	2.85443	0.0089156	65.9613	0.201615
37129-21	456PRC	19a	6	1.03084e-14	1.30649	0.0014763	0.455108	0.0004751	0.0053398	5e-05	0.0002608	9.76217e-06	1.72e-05	1.4e-05	99.6175	2.85708	0.0105514	66.0213	0.2386
37129-22	456PRC	19a	6	9.70106e-15	1.22944	0.0015182	0.426834	0.0004837	0.0049296	3.22e-05	0.0002327	8.73213e-06	6.63e-06	1.41e-05	99.8485	2.87334	0.0113458	66.3904	0.256512
37129-23	456PRC	19a	6	6.17207e-15	0.782224	0.0013	0.270777	0.0004327	0.0031737	2.61e-05	0.0001455	8.24197e-06	1.43e-05	1.4e-05	99.4622	2.8706	0.0170371	66.3282	0.385196
37129-25	456PRC	19a	6	1.05182e-14	1.33326	0.0015182	0.464015	0.0004924	0.0056233	4.62e-05	0.0002202	9.26553e-06	-1.91e-06	1.41e-05	100.052	2.87214	0.0104907	66.363	0.237183
37129-26	456PRC	19a	6	1.02116e-14	1.29447	0.0016279	0.449977	0.0004579	0.0053029	4.24e-05	0.0002405	9.06091e-06	3.15e-05	1.41e-05	99.2831	2.85345	0.0108286	65.9391	0.24488
37129-27	456PRC	19b	6	9.19568e-15	1.16572	0.0015811	0.405007	0.0004191	0.004924	4.31e-05	0.0001812	8.78635e-06	2.51e-05	1.37e-05	99.3653	2.85734	0.0115781	66.0272	0.261816
37129-28	456PRC	19b	6	9.11749e-15	1.15567	0.0012657	0.40025	0.0003996	0.0048022	3.83e-05	0.0004094	1.37e-05	3.69e-05	1.35e-05	99.0658	2.85774	0.011296	66.0364	0.255436
37129-29	456PRC	19b	6	6.67264e-15	0.845802	0.0010296	0.294002	0.0003801	0.0034622	2.59e-05	0.0001649	8.65563e-06	2.27e-05	1.37e-05	99.2085	2.85142	0.0150912	65.893	0.341283
37129-30	456PRC	19b	6	8.46942e-15	1.07335	0.0012379	0.370763	0.0004191	0.0044701	4.12e-05	0.0002102	8.78635e-06	1.85e-05	1.36e-05	99.4951	2.87767	0.0122158	66.4885	0.276165
37129-31	456PRC	19b	6	1.13956e-14	1.44434	0.0012942	0.501742	0.0005272	0.0061441	4.61e-05	0.00025	8.98721e-06	1.89e-05	1.42e-05	99.6182	2.86497	0.0097066	66.2004	0.219475
37129-32	456PRC	19b	6	1.02546e-14	1.29963	0.0013379	0.452478	0.0004387	0.005263	3.06e-05	0.0002684	1.01e-05	2.26e-05	1.38e-05	99.4922	2.85499	0.0103031	65.974	0.23299
37129-33	456PRC	19b	6	9.34363e-15	1.18441	0.0013014	0.412818	0.0004191	0.0049655	4.12e-05	0.0002118	9.19348e-06	2.96e-05	1.39e-05	99.2647	2.84533	0.0112531	65.7548	0.254505
37129-34	456PRC	19b	6	7.73522e-15	0.980591	0.0012448	0.340722	0.0004387	0.0040236	2.69e-05	0.0001509	8.98721e-06	3.42e-05	1.38e-05	98.9673	2.84559	0.0134381	65.7607	0.30392
37129-35	456PRC	19b	6	7.88434e-15	0.99952	0.0012448	0.348031	0.0003704	0.0040776	2.5e-05	0.0001903	8.72067e-06	2.66e-05	1.36e-05	99.2153	2.84672	0.0128717	65.7863	0.291106
37129-37	456PRC	19b	6	7.62161e-15	0.966369	0.0012243	0.334498	0.0003801	0.0039801	2.41e-05	0.0001698	8.78635e-06	2.47e-05	1.38e-05	99.2472	2.86457	0.0135287	66.1914	0.305897
37129-38	456PRC	19b	6	1.4186e-14	1.79873	0.0014213	0.627946	0.0004977	0.0074127	5.49e-05	0.0003277	9.76729e-06	2.81e-05	1.43e-05	99.5425	2.84868	0.0079546	65.8308	0.179897
37129-39	456PRC	19b	6	1.1066e-14	1.40334	0.0012942	0.488347	0.0004977	0.0058903	4.12e-05	0.0002821	1.2e-05	1.95e-05	1.39e-05	99.5962	2.85936	0.0097316	66.0731	0.220055
37129-40	456PRC	19b	6	5.08536e-15	0.644969	0.0009974	0.223565	0.0002742	0.002759	3.35e-05	0.0001373	8.46463e-06	2.41e-05	1.35e-05	98.8966	2.85041	0.0190986	65.8701	0.431914
37129-41	456PRC	19b	6	1.35387e-14	1.71732	0.0015	0.597883	0.0005075	0.007131	4.51e-05	0.0003239	9.47629e-06	1.75e-05	1.39e-05	99.7066	2.86121	0.0081905	66.1151	0.185204
37129-42	456PRC	19b	6	1.03427e-14	1.31171	0.0012448	0.456944	0.0004583	0.0054152	4.41e-05	0.0002416	9.19348e-06	1.89e-05	1.41e-05	99.5798	2.85586	0.0103583	65.9938	0.234236
37129-43	456PRC	19b	6	1.3531e-14	1.71605	0.0015	0.596904	0.0005174	0.0071977	5.59e-05	0.0003095	9.5483e-06	2.52e-05	1.42e-05	99.5719	2.85992	0.0083529	66.0857	0.188878
37129-44	456PRC	19b	6	1.62136e-14	2.05628	0.0014213	0.717257	0.0005865	0.0086169	5.1e-05	0.0004155	1.05e-05	2.36e-05	1.45e-05	99.6684	2.85467	0.0072417	65.9666	0.163763
37129-45	456PRC	19b	6	1.65426e-14	2.09792	0.0016643	0.733116	0.0008544	0.008604	5.88e-05	0.0004559	1.37e-05	1.78e-05	1.43e-05	99.7584	2.85204	0.0075443	65.907	0.170612
37129-46	456PRC	16b	6	1.03696e-14	1.31387	0.0014666	0.457172	0.0004297	0.005525	4.95e-05	0.0001299	9.09725e-06	2.35e-05	1.33e-05	99.4759	2.8556	0.0102047	65.9878	0.229388
37129-47	456PRC	16b	6	1.91046e-14	2.42064	0.0017863	0.847741	0.0006266	0.010142	5.92e-05	0.0002887	9.74525e-06	1.43e-05	1.38e-05	99.835	2.84744	0.0065192	65.8026	0.146558
37129-48	456PRC	16b	6	1.19124e-14	1.50938	0.001622	0.5269	0.0004591	0.0061266	3.14e-05	0.0001669	9.1526e-06	1.6e-05	1.34e-05	99.693	2.85259	0.0091577	65.9196	0.20586
37129-49	456PRC	16b	6	4.41376e-15	0.55924	0.0011406	0.193408	0.0002017	0.0022489	2.16e-05	7.38e-05	9.04268e-06	1.16e-05	1.26e-05	99.3905	2.87061	0.0208849	66.3284	0.469377
37129-50	456PRC	16b	6	1.14566e-14	1.45158	0.001622	0.506923	0.0004493	0.0061052	4.56e-05	0.000168	9.38137e-06	2.69e-05	1.33e-05	99.4589	2.84478	0.0094346	65.7422	0.212107
37129-24	456PRC	19a	6	1.01026e-14	1.28048	0.0015182	0.438608	0.0005277	0.0051171	3.22e-05	0.0002541	9.26553e-06	8.68e-06	1.41e-05	99.8079	2.91111	0.0111698	67.2469	0.252414
37129-36	456PRC	19b	6	8.10344e-15	1.02742	0.0011715	0.348318	0.0003801	0.0040902	2.59e-05	0.0001831	8.91964e-06	2.48e-05	1.35e-05	99.2875	2.92591	0.0128087	67.5824	0.289394
Weighted Mean																2.85604	0.0015214	65.9981	0.0400986
Sample TR14-1			J = 0.013226 ± 3.46194E-06
37005-01	443PRA	12b	6	6.01527e-15	0.762061	0.0007388	0.267481	0.0002972	0.0032128	3.83e-05	0.0002524	1.45e-05	3.73e-05	1.27e-05	98.5857	2.80516	0.0151636	65.8631	0.348846
37005-02	443PRA	12b	6	1.05563e-14	1.33717	0.0012888	0.471149	0.0004646	0.0055909	4.49e-05	0.0001335	1.4e-05	3.79e-05	1.28e-05	99.1671	2.81086	0.0095555	65.9946	0.219813
37005-03	443PRA	12b	6	1.05194e-14	1.33272	0.0011962	0.46708	0.000534	0.0056893	4.78e-05	0.0001616	1.7e-05	3.84e-05	1.3e-05	99.1572	2.82562	0.0098247	66.3348	0.225964
37005-04	443PRA	12b	6	5.17875e-15	0.656045	0.0010153	0.230046	0.0002777	0.0028109	3.73e-05	8.96e-05	1.36e-05	3.24e-05	1.31e-05	98.5442	2.80667	0.0182347	65.8981	0.419489
37005-06	443PRA	12b	6	1.14926e-14	1.45651	0.0012888	0.514138	0.0005141	0.0061642	4.78e-05	0.0001578	1.94e-05	1.97e-05	1.32e-05	99.6126	2.81831	0.0091042	66.1663	0.209411
37005-07	443PRA	12b	6	5.61867e-15	0.711967	0.0011049	0.250093	0.0002874	0.003109	3.92e-05	0.0001105	1.86e-05	3.69e-05	1.25e-05	98.4769	2.79984	0.0163093	65.7405	0.375227
37005-08	443PRA	12b	6	6.35182e-15	0.804622	0.0011962	0.281771	0.0003265	0.0032467	4.02e-05	0.0001208	1.39e-05	2.39e-05	1.26e-05	99.1322	2.82717	0.0147886	66.3705	0.340123
37005-09	443PRA	12b	6	6.23927e-15	0.79028	0.0010599	0.276954	0.0003462	0.0032672	2.56e-05	9.65e-05	1.4e-05	1.9e-06	1.27e-05	99.9457	2.84825	0.0149898	66.8564	0.344658
37005-10	443PRA	12b	6	1.15196e-14	1.45919	0.0013824	0.514756	0.0004646	0.0063033	4.88e-05	0.0001972	1.4e-05	4.05e-05	1.34e-05	99.1919	2.8082	0.0091734	65.9332	0.21103
37005-11	443PRA	12b	6	1.10215e-14	1.39592	0.0011962	0.491996	0.0004646	0.0057884	3.55e-05	0.0001535	1.86e-05	2.93e-05	1.3e-05	99.3879	2.81625	0.0092632	66.1188	0.213074
37005-14	443PRA	12b	6	4.47746e-15	0.567105	0.0006718	0.199261	0.0002103	0.002431	3.45e-05	0.0001006	1.63e-05	3.34e-05	1.25e-05	98.2678	2.79314	0.0195981	65.5859	0.450932
37005-15	443PRA	12b	6	5.60257e-15	0.709655	0.0010242	0.249182	0.0002583	0.0030004	3.73e-05	0.0001167	1.63e-05	2.15e-05	1.24e-05	99.1188	2.8192	0.0159988	66.187	0.367994
37005-16	443PRA	12b	6	1.17525e-14	1.48878	0.0012888	0.523898	0.0004943	0.0061758	4.68e-05	0.0001685	1.43e-05	2.67e-05	1.28e-05	99.4799	2.82331	0.008742	66.2816	0.201067
37005-17	443PRA	12b	6	6.69214e-15	0.847638	0.000778	0.298965	0.0004052	0.0035224	2.64e-05	0.0001355	1.39e-05	4.27e-05	1.28e-05	98.517	2.78959	0.0139736	65.5041	0.321533
37005-18	443PRA	12b	6	5.80853e-15	0.73601	0.0010869	0.257343	0.0002972	0.0030092	2.64e-05	9.78e-05	1.35e-05	4.25e-05	1.26e-05	98.2945	2.80763	0.0159422	65.9201	0.366746
37005-19	443PRA	12b	6	5.61523e-15	0.711263	0.001042	0.249664	0.0002583	0.003011	3.64e-05	7.74e-05	1.38e-05	2.41e-05	1.23e-05	99.0028	2.81683	0.0159251	66.1322	0.36631
37005-20	443PRA	12b	6	1.00671e-14	1.27513	0.0012888	0.448454	0.0004151	0.005349	5.07e-05	0.0001358	1.78e-05	2.7e-05	1.29e-05	99.3825	2.82218	0.0099705	66.2555	0.229327
37005-21	443PRA	12b	6	6.02378e-15	0.762967	0.0011049	0.268008	0.0002972	0.0031536	2.64e-05	0.0001085	1.43e-05	1.83e-05	1.25e-05	99.3055	2.82338	0.0152727	66.2833	0.351274
37005-23	443PRA	12b	6	5.27181e-15	0.667788	0.0009976	0.233294	0.0002874	0.0026975	2.3e-05	5.99e-05	1.78e-05	1.82e-05	1.25e-05	99.198	2.8358	0.0173122	66.5695	0.39812
37005-24	443PRA	12b	6	4.9588e-15	0.628139	0.0009801	0.220071	0.000268	0.0026974	3.83e-05	8.54e-05	1.31e-05	1.76e-05	1.27e-05	99.1834	2.82728	0.0183993	66.3732	0.423165
37005-25	443PRA	12b	6	1.08718e-14	1.37689	0.0015719	0.482807	0.0004745	0.0059254	5.36e-05	0.0001674	1.78e-05	1.38e-05	1.28e-05	99.7197	2.84017	0.0095658	66.6702	0.219968
37005-26	443PRA	12b	6	4.57763e-15	0.579781	0.000637	0.204691	0.0002008	0.0025266	3.45e-05	0.0001351	1.32e-05	4.07e-05	1.27e-05	97.9373	2.77046	0.019212	65.063	0.442178
37005-27	443PRA	12b	6	1.07291e-14	1.35888	0.0015719	0.477519	0.0004349	0.0058166	4.49e-05	0.0002308	1.56e-05	3.85e-05	1.32e-05	99.1792	2.8187	0.0098353	66.1753	0.226227
37005-28	443PRA	12b	6	9.07081e-15	1.14888	0.0012888	0.403716	0.0003954	0.0049974	4.78e-05	0.0001934	1.4e-05	3.92e-05	1.3e-05	99.0068	2.81385	0.0110309	66.0635	0.253744
37005-29	443PRA	12b	6	4.76306e-15	0.603285	0.000637	0.211733	0.000239	0.0025383	2.22e-05	9.07e-05	1.33e-05	2.05e-05	1.27e-05	99.0084	2.81736	0.0187544	66.1444	0.431386
37005-30	443PRA	12b	6	7.53999e-15	0.955205	0.0012888	0.335168	0.0003462	0.0040281	4.4e-05	8.62e-05	1.7e-05	2.37e-05	1.25e-05	99.2719	2.8255	0.0126186	66.3321	0.29022
37005-32	443PRA	12b	6	5.0553e-15	0.640347	0.0010959	0.224651	0.0002294	0.0026727	2.39e-05	7.99e-05	1.33e-05	3.88e-05	1.27e-05	98.2073	2.79567	0.0180976	65.6445	0.416393
37005-33	443PRA	12b	6	7.47474e-15	0.947148	0.0011049	0.333034	0.0004052	0.0040048	3.92e-05	0.0001185	1.41e-05	1.02e-05	1.29e-05	99.6975	2.83171	0.0129509	66.4752	0.297841
37005-34	443PRA	12b	6	5.43545e-15	0.688851	0.0010331	0.237915	0.0002777	0.0029275	3.92e-05	9.75e-05	1.28e-05	5.98e-05	1.25e-05	97.4314	2.81734	0.0170347	66.1441	0.39183
37005-35	443PRA	12b	6	9.22869e-15	1.1694	0.0011962	0.411552	0.0004151	0.0048728	2.56e-05	0.0001539	1.41e-05	-1.33e-06	1.27e-05	100.054	2.83927	0.0105431	66.6494	0.242442
37005-36	443PRA	12b	6	5.82849e-15	0.738666	0.001042	0.258614	0.000268	0.0031147	2.56e-05	0.000119	1.4e-05	4.74e-05	1.24e-05	98.1062	2.79852	0.0154931	65.7101	0.356456
37005-37	443PRA	12b	6	8.94852e-15	1.13416	0.0012888	0.399328	0.000425	0.004796	4.49e-05	0.0001306	1.35e-05	7.89e-06	1.26e-05	99.8099	2.83108	0.0108967	66.4608	0.250601
37005-38	443PRA	12b	6	5.65333e-15	0.716376	0.0010242	0.251865	0.000268	0.0030239	3.83e-05	9.43e-05	1.34e-05	8.94e-06	1.25e-05	99.6475	2.83057	0.0159809	66.449	0.367528
37005-39	443PRA	12b	6	4.88119e-15	0.618318	0.001051	0.213908	0.0002583	0.0025453	2.39e-05	0.001135	1.86e-05	5.69e-05	1.26e-05	97.529	2.81567	0.0189316	66.1055	0.435471
37005-40	443PRA	12b	6	5.86995e-15	0.743512	0.001042	0.261418	0.0002972	0.0030752	2.39e-05	0.0001375	1.46e-05	2.27e-05	1.27e-05	99.1138	2.81528	0.0157037	66.0965	0.361224
37005-42	443PRA	13	6	1.2119e-14	1.53648	0.0016682	0.541384	0.0004647	0.0065026	5.63e-05	0.000109	1.72e-05	5.86e-05	1.32e-05	98.8774	2.80217	0.0088275	65.7943	0.203089
37005-43	443PRA	13	6	5.87332e-15	0.744654	0.0009262	0.260715	0.0003365	0.0031445	2.51e-05	3.56e-05	1.2e-05	1.55e-05	1.27e-05	99.3877	2.83464	0.0157816	66.5428	0.362927
37005-44	443PRA	13	6	1.04661e-14	1.32689	0.0018501	0.466955	0.0005341	0.0056208	3.61e-05	9.17e-05	1.26e-05	2.29e-05	1.35e-05	99.4999	2.82331	0.0105083	66.2816	0.241692
37005-46	443PRA	13	6	7.90631e-15	1.00211	0.001206	0.351532	0.0003857	0.0043257	4.27e-05	0.0001158	1.2e-05	2.49e-05	1.29e-05	99.2858	2.82628	0.0123274	66.3501	0.283522
37005-47	443PRA	13	6	7.79514e-15	0.988013	0.0013202	0.347011	0.0004252	0.0041651	3.98e-05	7.62e-05	1.27e-05	3.51e-05	1.26e-05	98.9557	2.81343	0.0124408	66.0538	0.286175
37005-48	443PRA	13	6	5.99432e-15	0.75979	0.0013202	0.265315	0.0003169	0.0031559	2.51e-05	5.4e-05	1.22e-05	3.19e-05	1.25e-05	98.7626	2.82423	0.0156664	66.3029	0.360326
37005-49	443PRA	13	6	7.38662e-15	0.936253	0.0013202	0.327468	0.0003365	0.0039127	2.68e-05	8.66e-05	1.27e-05	5.49e-05	1.33e-05	98.2687	2.80554	0.0134676	65.8719	0.309827
37005-50	443PRA	13	6	8.84191e-15	1.12076	0.0014046	0.394286	0.0004054	0.004657	3.23e-05	0.0001224	1.64e-05	5.45e-05	1.29e-05	98.5703	2.79784	0.0112764	65.6944	0.259443
37005-51	443PRA	13	6	8.66956e-15	1.09888	0.0013202	0.381641	0.0004252	0.0045486	3.89e-05	8.23e-05	1.29e-05	6.15e-05	1.31e-05	98.3458	2.82764	0.0117022	66.3815	0.269138
37005-52	443PRA	13	6	9.74331e-15	1.23498	0.0014046	0.432529	0.0004548	0.0051845	4.66e-05	0.0001211	1.64e-05	7.6e-05	1.27e-05	98.1844	2.79938	0.0103459	65.73	0.238031
37005-53	443PRA	13	6	5.27467e-15	0.668736	0.001214	0.234514	0.0002586	0.0028073	2.95e-05	5.81e-05	1.41e-05	4.9e-05	1.28e-05	97.829	2.78566	0.0177137	65.4135	0.407614
37005-54	443PRA	13	6	4.99239e-15	0.632943	0.0009324	0.222052	0.0002586	0.0026456	3.61e-05	8.66e-05	1.3e-05	3.84e-05	1.26e-05	98.2197	2.79565	0.0180044	65.6439	0.414249
37005-55	443PRA	13	6	6.5585e-15	0.831529	0.001222	0.290374	0.0003365	0.0035927	4.18e-05	7.86e-05	1.22e-05	4.41e-05	1.27e-05	98.4372	2.81484	0.0144689	66.0863	0.332823
37005-56	443PRA	13	6	1.04966e-14	1.33054	0.0015789	0.46675	0.0004548	0.0054988	3.23e-05	0.000151	1.27e-05	5.65e-05	1.32e-05	98.7573	2.81117	0.010013	66.0017	0.230335
37005-57	443PRA	13	6	1.14751e-14	1.45431	0.0015789	0.513034	0.0005242	0.0061145	3.51e-05	0.0001211	1.33e-05	6.08e-05	1.27e-05	98.7709	2.79585	0.0090573	65.6484	0.208393
37005-58	443PRA	13	6	1.21366e-14	1.53776	0.0016682	0.540133	0.0004647	0.0064419	5.04e-05	0.0001568	1.25e-05	5.42e-05	1.34e-05	98.9711	2.81364	0.0089389	66.0587	0.20562
37005-59	443PRA	13	6	8.68445e-15	1.10044	0.0014909	0.386997	0.0004548	0.0046877	4.08e-05	0.0001007	1.19e-05	1.96e-05	1.29e-05	99.4882	2.82491	0.0116461	66.3185	0.267856
37005-60	443PRA	13	6	8.79172e-15	1.11407	0.0014046	0.385087	0.0004054	0.0046438	4.37e-05	6.91e-05	1.49e-05	9.29e-05	1.31e-05	97.5227	2.81731	0.0116995	66.1434	0.269111
37005-62	443PRA	14b	6	6.457e-15	0.81816	0.0013721	0.286932	0.0003537	0.0034075	2.78e-05	2.67e-05	1.27e-05	3.68e-05	1.37e-05	98.664	2.80905	0.0155915	65.953	0.358671
37005-64	443PRA	14b	6	9.95394e-15	1.26118	0.0016919	0.444728	0.0004429	0.0055009	4.12e-05	9.97e-05	1.33e-05	1.79e-05	1.35e-05	99.5997	2.82023	0.0104948	66.2105	0.241392
37005-65	443PRA	14b	6	9.1222e-15	1.15577	0.0013506	0.406044	0.0004231	0.0048711	5.49e-05	7.96e-05	1.26e-05	3.54e-05	1.34e-05	99.1054	2.81667	0.0110489	66.1286	0.254147
37005-66	443PRA	14b	6	7.14279e-15	0.904997	0.0013225	0.315775	0.0003636	0.0037578	4.12e-05	5e-05	1.3e-05	9.67e-06	1.34e-05	99.696	2.85292	0.0139644	66.964	0.321062
37005-67	443PRA	14b	6	1.22137e-14	1.54751	0.0016919	0.543053	0.0004728	0.0064136	3.54e-05	0.0001152	1.33e-05	2.72e-05	1.34e-05	99.4944	2.83096	0.0086281	66.4579	0.198429
37005-68	443PRA	14b	6	5.63564e-15	0.714005	0.0013577	0.239824	0.000265	0.0028963	2.5e-05	6.36e-05	1.29e-05	0.000102	1.38e-05	95.7582	2.84663	0.0186151	66.819	0.428022
37005-70	443PRA	14b	6	4.8482e-15	0.614267	0.0010512	0.215152	0.0002258	0.0024831	2.14e-05	7.91e-05	1.3e-05	3.98e-05	1.34e-05	98.1007	2.79658	0.0196339	65.6654	0.451737
37005-71	443PRA	14b	6	1.21413e-14	1.53821	0.0017755	0.539229	0.0004628	0.006324	3.16e-05	0.0001086	1.34e-05	2.36e-05	1.36e-05	99.5609	2.83578	0.008843	66.569	0.203358
37005-72	443PRA	14b	6	4.88819e-15	0.619319	0.0010599	0.21698	0.0002161	0.002579	2.59e-05	5.53e-05	1.27e-05	3.57e-05	1.35e-05	98.304	2.8016	0.0195359	65.7812	0.449453
37005-73	443PRA	14b	6	9.68021e-15	1.22654	0.0015305	0.432802	0.0004827	0.0052705	4.9e-05	5.55e-05	1.56e-05	1.82e-05	1.35e-05	99.5709	2.81752	0.0107111	66.1481	0.246374
37005-74	443PRA	14b	6	7.53632e-15	0.955204	0.0013793	0.33692	0.0003933	0.0041105	4.12e-05	0.0001012	1.25e-05	2.15e-05	1.34e-05	99.359	2.81266	0.0131676	66.036	0.302897
37005-76	443PRA	14b	6	9.62599e-15	1.22009	0.0015305	0.427609	0.000433	0.0051634	4.7e-05	7.56e-05	1.63e-05	2.19e-05	1.36e-05	99.4807	2.83416	0.0107826	66.5317	0.247968
37005-77	443PRA	14b	6	8.24018e-15	1.04423	0.0013793	0.365254	0.0003735	0.0044081	4.7e-05	8.32e-05	1.27e-05	4.03e-05	1.34e-05	98.8712	2.82235	0.0121775	66.2596	0.280087
37005-78	443PRA	14b	6	5.76043e-15	0.730148	0.0013365	0.25758	0.0002748	0.0031729	3.54e-05	3.98e-05	1.31e-05	1.04e-06	1.29e-05	99.974	2.82959	0.0163323	66.4265	0.375615
37005-79	443PRA	14b	6	3.45864e-15	0.43833	0.0010512	0.152606	0.0001584	0.001789	1.79e-05	1.07e-05	1.25e-05	1.66e-05	1.3e-05	98.8738	2.83563	0.0267228	66.5656	0.61453
37005-05	443PRA	12b	6	6.72827e-16	0.0852427	0.0006107	0.0298444	0.0001193	0.0003483	1.7e-05	0.0036803	2.92e-05	2.29e-05	1.25e-05	98.2404	2.80672	0.127944	65.8991	2.94335
37005-12	443PRA	12b	6	9.84189e-16	0.124668	0.0006862	0.0436128	9.19e-05	0.0005209	1.91e-05	0.0052471	4.92e-05	3.67e-05	1.26e-05	97.3599	2.78371	0.0881835	65.3685	2.02926
37005-13	443PRA	12b	6	3.27535e-16	0.041483	0.0005576	0.0146251	9.55e-05	0.0002103	2.14e-05	0.002075	3.01e-05	2.41e-05	1.21e-05	89.9963	2.55398	0.250422	60.0626	5.77958
37005-22	443PRA	12b	6	5.67488e-16	0.0718867	0.0006438	0.0253622	0.0001062	0.000291	1.64e-05	0.002775	2.37e-05	1.77e-05	1.24e-05	98.3641	2.78834	0.149208	65.4754	3.43333
37005-31	443PRA	12b	6	3.33797e-17	0.0042284	0.0005371	0.0020428	8.58e-05	1.92e-05	1.56e-05	0.0009606	1.86e-05	1.83e-05	1.22e-05	4.65013	0.0967133	1.81967	2.31115	43.3599
37005-41	443PRA	14b	6	7.08445e-16	0.0898089	0.0008963	0.0316221	0.0001283	0.0003578	1.63e-05	0.0031598	3.64e-05	3.35e-05	1.27e-05	96.564	2.74375	0.124063	64.4466	2.85635
37005-45	443PRA	14b	6	6.50318e-16	0.0824309	0.0008523	0.0215677	0.0001124	0.0002377	2e-05	0.0015638	1.89e-05	9.22e-05	1.24e-05	70.7905	2.70563	0.177912	63.5669	4.09816
37005-61	443PRA	14b	6	3.82507e-16	0.0484674	0.0010232	0.0154357	9.91e-05	0.0001564	1.96e-05	0.0011166	1.7e-05	2.97e-05	1.33e-05	87.9676	2.76274	0.267541	64.8849	6.15824
37005-63	443PRA	14b	6	3.91065e-16	0.0495521	0.001009	0.0171412	9.57e-05	0.0002212	1.47e-05	0.0011474	2.28e-05	1.35e-05	1.3e-05	98.2122	2.83935	0.235154	66.6513	5.40748
37005-69	443PRA	14b	6	4.13459e-16	0.0523835	0.0010024	0.0185133	9.49e-05	0.0002203	1.36e-05	0.0014284	2.92e-05	1.61e-05	1.3e-05	98.3248	2.78301	0.218504	65.3525	5.02821
37005-75	443PRA	14b	6	4.87095e-16	0.0617243	0.0010057	0.0208923	9.91e-05	0.0002474	1.88e-05	0.0014698	1.94e-05	3.28e-05	1.29e-05	90.7327	2.68111	0.191446	63.0007	4.41128
Weighted Mean																2.8182	0.00149794	66.1639	0.0381847
J = 0.013014 ± 4.57069E-06
37131-01	456PRC	20	6	7.45193e-15	0.944364	0.0013994	0.324622	0.0003801	0.0038207	2.64e-05	0.0005214	1.17e-05	3.19e-05	1.38e-05	99.012	2.87807	0.0144662	66.481	0.32704
37131-03	456PRC	20	6	4.8876e-15	0.619478	0.0014861	0.214756	0.0002459	0.0025282	3.29e-05	0.0003603	1.29e-05	1.68e-05	1.34e-05	99.2111	2.85951	0.0206795	66.0599	0.467614
37131-05	456PRC	20	6	8.85094e-15	1.12195	0.0011293	0.375471	0.0004191	0.0046876	3.76e-05	0.0005571	1.53e-05	0.0001507	1.37e-05	96.0079	2.86655	0.0126578	66.2197	0.286198
37131-06	456PRC	20	6	3.05425e-15	0.387194	0.0009	0.13234	0.0002366	0.0015916	1.86e-05	0.000241	1.06e-05	1.64e-05	1.31e-05	98.7568	2.88706	0.0312156	66.6847	0.705617
37131-09	456PRC	20	6	6.69333e-15	0.848378	0.0010042	0.295252	0.0003607	0.0034532	2.64e-05	0.0004511	1.14e-05	2.67e-05	1.31e-05	99.0814	2.8447	0.0147162	65.7239	0.332831
37131-11	456PRC	20	6	5.10936e-15	0.647613	0.0010182	0.224183	0.0002837	0.0025946	2.11e-05	0.0002347	1.03e-05	2.44e-06	1.34e-05	99.901	2.88357	0.0192036	66.6056	0.43411
37131-12	456PRC	20	6	3.39501e-15	0.430287	0.0009121	0.148532	0.000191	0.0017507	1.86e-05	0.0002518	1.26e-05	1.41e-05	1.31e-05	99.0411	2.86684	0.0277389	66.2261	0.627186
37131-13	456PRC	20	6	7.91223e-15	1.00283	0.001137	0.324265	0.0003801	0.003979	2.46e-05	0.0006609	1.79e-05	0.00029	1.45e-05	91.3911	2.82414	0.0151713	65.2575	0.343211
37131-16	456PRC	20	6	9.93539e-15	1.25948	0.0013147	0.421582	0.0004094	0.0053334	3.67e-05	0.0006997	1.37e-05	0.0001849	1.44e-05	95.6393	2.85495	0.0119871	65.9564	0.271072
37131-17	456PRC	20	6	4.86436e-15	0.616717	0.0010615	0.214141	0.0002181	0.0025363	3.38e-05	0.0002623	1.03e-05	2.63e-05	1.36e-05	98.7424	2.84143	0.0202806	65.6498	0.458698
37131-19	456PRC	20	6	8.04082e-15	1.01947	0.0009904	0.350968	0.0003607	0.0041958	4.24e-05	0.000461	1.53e-05	3.44e-05	1.37e-05	99.0103	2.87366	0.0130112	66.3809	0.294162
37131-20	456PRC	20	6	8.11506e-15	1.02873	0.0010912	0.350269	0.0003898	0.0042548	3.86e-05	0.0004774	1.22e-05	0.0001158	1.42e-05	96.6577	2.83652	0.0136738	65.5383	0.309286
37131-23	456PRC	19b	6	8.86894e-15	1.12473	0.0012379	0.381966	0.0004387	0.0051859	4.22e-05	0.0002572	8.98721e-06	9.78e-05	1.41e-05	97.4196	2.86586	0.0122902	66.2041	0.277888
37131-24	456PRC	19b	6	7.30601e-15	0.926493	0.0012311	0.300466	0.0003607	0.003536	2.59e-05	0.0002377	8.85268e-06	0.0002281	1.41e-05	92.6622	2.85458	0.0153712	65.948	0.347601
37131-25	456PRC	19b	6	6.92169e-15	0.877916	0.0011844	0.304574	0.0003607	0.0035813	2.05e-05	0.0002745	1.1e-05	1.37e-05	1.34e-05	99.5502	2.86673	0.0143606	66.2238	0.324698
37131-26	456PRC	19b	6	8.36559e-15	1.0612	0.0014213	0.366988	0.0004289	0.0044367	4.12e-05	0.0003846	1.28e-05	2.83e-05	1.38e-05	99.2239	2.86647	0.0126449	66.2179	0.285906
37131-27	456PRC	19b	6	9.42842e-15	1.19613	0.0013086	0.412361	0.0004094	0.0049934	4.41e-05	0.000647	1.55e-05	3.37e-05	1.37e-05	99.1902	2.87446	0.0111498	66.399	0.252077
37131-28	456PRC	19b	6	7.92268e-15	1.00491	0.0013454	0.348531	0.0003704	0.0041518	2.69e-05	0.0003204	9.47629e-06	2.14e-05	1.34e-05	99.3818	2.86271	0.0127702	66.1326	0.288754
37131-29	456PRC	19b	6	3.67551e-15	0.46616	0.0011044	0.160848	0.000191	0.0019192	1.88e-05	0.0001341	8.2801e-06	3.28e-05	1.31e-05	97.9143	2.83498	0.0256864	65.5033	0.58101
37131-30	456PRC	19b	6	7.84618e-15	0.995116	0.001191	0.344914	0.0003801	0.0042114	4.51e-05	0.0003277	9.62081e-06	1.76e-05	1.37e-05	99.4913	2.86768	0.0130553	66.2454	0.295182
37131-31	456PRC	19b	6	4.94471e-15	0.627116	0.0010986	0.216908	0.0002459	0.0025994	3.16e-05	0.0002308	1.07e-05	2.04e-05	1.31e-05	99.0502	2.86096	0.0192253	66.0928	0.434722
37131-32	456PRC	19b	6	1.05126e-14	1.33326	0.0013379	0.460688	0.0004485	0.0053097	2.97e-05	0.0004256	9.99049e-06	1.69e-05	1.38e-05	99.6399	2.88088	0.0101564	66.5447	0.229599
37131-34	456PRC	19b	6	6.75427e-15	0.856447	0.0011526	0.297323	0.0003413	0.0034553	2.32e-05	0.0002492	9.62081e-06	1.15e-05	1.33e-05	99.6146	2.86667	0.0145703	66.2223	0.32944
37131-36	456PRC	19b	6	7.22726e-15	0.916247	0.001178	0.309238	0.000351	0.0038907	4.22e-05	0.0003338	1.28e-05	0.0001295	1.34e-05	95.8018	2.83582	0.0142264	65.5225	0.321788
37131-37	456PRC	19b	6	8.31717e-15	1.05444	0.0012448	0.354205	0.0004094	0.0043481	2.59e-05	0.0004297	9.69381e-06	0.0001069	1.38e-05	96.9965	2.88475	0.0129816	66.6324	0.293453
37131-38	456PRC	19b	6	7.43034e-15	0.94196	0.0012657	0.3278	0.000351	0.0038057	2.5e-05	0.0002779	1.37e-05	8.66e-06	1.35e-05	99.7424	2.86342	0.0135175	66.1486	0.305648
37131-41	456PRC	19b	6	5.15557e-15	0.653598	0.0010018	0.22662	0.0002459	0.0027194	3.06e-05	0.0001869	8.85268e-06	4.88e-05	1.33e-05	97.7892	2.81764	0.0185057	65.1099	0.418678
37131-02	456PRC	20	6	4.57661e-16	0.0580056	0.0007762	0.0189514	0.0001175	0.0001947	1.78e-05	0.0099546	5.86e-05	3.4e-05	1.28e-05	89.0254	2.72743	0.207639	63.0613	4.70301
37131-04	456PRC	20	6	2.0013e-16	0.0253657	0.0007529	0.0079581	0.0001057	0.0001077	1.32e-05	0.0046392	3.89e-05	2.39e-05	1.28e-05	78.8143	2.51502	0.49325	58.2282	11.2019
37131-10	456PRC	20	6	3.68834e-16	0.0467499	0.0007558	0.0153659	0.0001092	0.0002022	1.7e-05	0.0072857	3.79e-05	3.54e-05	1.29e-05	83.4131	2.5398	0.2565	58.7928	5.82343
37131-14	456PRC	20	6	6.23299e-16	0.0790057	0.000769	0.0260475	9.98e-05	0.0003185	1.86e-05	0.01	4.87e-05	4.28e-05	1.29e-05	88.7286	2.69258	0.151997	62.2692	3.44424
37131-15	456PRC	20	6	2.56469e-16	0.0325105	0.0007529	0.0107331	0.000108	0.0001416	1.41e-05	0.0048866	4.08e-05	1.41e-05	1.27e-05	92.9043	2.81612	0.361725	65.0754	8.18393
37131-18	456PRC	20	6	5.79047e-16	0.073415	0.000769	0.0249172	0.0001003	0.0003224	1.86e-05	0.0117982	5.56e-05	2.98e-05	1.33e-05	94.1507	2.77622	0.163404	64.1695	3.69883
37131-21	456PRC	19b	6	5.77309e-15	0.732161	0.0015	0.243695	0.0003316	0.0030884	3.83e-05	0.0002564	9.33381e-06	4.54e-05	1.34e-05	98.1701	2.94666	0.0183207	68.0359	0.413824
37131-22	456PRC	19b	6	4.48813e-16	0.0569154	0.0009396	0.0150426	0.0001086	0.0001807	1.29e-05	0.0042161	2.39e-05	5.3e-05	1.29e-05	76.4586	2.89437	0.265971	66.8507	6.01162
37131-33	456PRC	19b	6	6.67241e-16	0.0846116	0.0009315	0.0273945	0.0001259	0.00031	1.31e-05	0.0060791	3.76e-05	2.84e-05	1.3e-05	94.2143	2.91048	0.147226	67.2158	3.32701
37131-35	456PRC	19b	6	4.4132e-16	0.0559575	0.0009341	0.018912	0.0001155	0.0001736	1.55e-05	0.005795	4.65e-05	1.98e-05	1.29e-05	95.5397	2.8286	0.210749	65.3586	4.76739
37131-39	456PRC	19b	6	1.62696e-16	0.0206257	0.0009289	0.0064363	0.0001051	6.91e-05	1.22e-05	0.001986	1.73e-05	-7.16e-06	1.28e-05	116.089	3.72259	0.617635	85.5335	13.8168
37131-40	456PRC	19b	6	7.56419e-15	0.959013	0.0011588	0.32696	0.0003996	0.0039095	4.12e-05	0.0003129	9.69381e-06	9.01e-06	1.37e-05	99.7389	2.92266	0.0137877	67.4919	0.311527
37131-42	456PRC	19b	6	5.80598e-15	0.736023	0.001191	0.233151	0.0002366	0.0028161	3.25e-05	0.0002158	8.59128e-06	9.95e-05	1.37e-05	95.9814	3.02714	0.0188522	69.8585	0.425401
37131-43	456PRC	19b	6	1.02992e-14	1.30564	0.0013454	0.263986	0.0003316	0.0031288	2.59e-05	0.0005567	1.03e-05	0.0001863	1.4e-05	95.7638	4.73231	0.0183446	108.053	0.405301
37131-44	456PRC	19b	6	5.3935e-16	0.0683762	0.0009315	0.0228225	0.0001182	0.000266	1.39e-05	0.0062197	4.65e-05	2.54e-05	1.3e-05	94.3301	2.82742	0.17595	65.3319	3.98025
Weighted Mean																2.86206	0.00279621	66.1179	0.0668239
Notes: Isotope abundances are given as amplified ion beam current in nA, corrected for background, mass discrimination, and radioactive decay. Data shown in red italics are outliers interpreted as xenocrysts, altered grains, or plagioclase. Results interpreted as quartz and results affected by incorrigible mass spectrometry are excluded but not shown. Plagioclase grains were recognized based on K…
